# Supplementary material for: Large-scale single-cell long-read genomics enables high-resolution microbiome profiling
Source: Research Square preprint supplement (doi:10.21203/rs.3.rs-7858644/v1), 2025-10-21
Supplement: Supplementary file 1 [file e50df788765da5738d84fc7b.xlsx]

## Sheet: Primers_&_sequences
Oligos	Sequence 5-3
Tn5 ME and adaptor N7	GTCTCGTGGGCTCGGAGATGTGTATAAGAGACAG
Tn5 ME and adaptor N5	CTGTCTCTTATACACATCTGACGCTGCCGACGA
linear PCR Primer	see barocde beads
Bulk PCR Forward Primer	CTACACGACGCTCTTCCGATCT
Bulk PCR Reverse Primer	TCGTCGGCAGCGTC
Barcode beads
CTACACGACGCTCTTCCGATCT	NNNNNNN	ACAG	NNNNNNN	GTCA	NNNNNNN	GTCTCGTGGGCTCGG
PCR handle	Barcode1	Linker1	Barcode2	Linker2	Barcode3	N7
Final read
CTACACGACGCTCTTCCGATCT	NNNNNNNACAGNNNNNNNGTCANNNNNNN	GTCTCGTGGGCTCGGAGATGTGTATAAGAGACAG	NNNNNNNNN	CTGTCTCTTATACACATCTGACGCTGCCGACGA
PCR handle	Cell Barcode	Tn5 ME and adaptor N7	Genome fragment	Tn5 ME and adaptor N5

## Sheet: CDI_seq_info
Patient	Condition/sample	Sequencing run	Read count	Total bps	Mean read length (bp)	SAG count	mean_contigs_per_SAG	median_contigs_per_SAG	mean_Largest_contig_per_SAG (bp)	median_Largest_contig_per_SAG (bp)	mean_assembly_length (bp)	median_assembly_length (bp)	mean_GC (%)	median_GC (%)	mean_N50_per_SAG (bp)	median_N50_per_SAG (bp)
FMT-1	Before FMT	run 1	87285929	117905833530	1350.8	7940	153.615	148	20998.8	20407	585485	569685	41.4804	41.71	4869.18	4835
FMT-1	Week 2	run 1	115617367	173923205723	1504.3	2429	216.156	205	28149.6	23955	918370	853380	43.6565	42.16	5632.05	5434
FMT-2	Before FMT	run 1	64023650	66263788023	1034.99	3340	170.679	154	12067	9921.5	327158	267746	44.8037	45.13	2141.19	1931
FMT-2	Before FMT	run 2	78121652	92105427158	1179	13480	101.397	92	13540.2	12699	253973	228608	45.1646	43.2	3212.07	3002
FMT-2	Week 2	run 1	56454137	58371738262	1033.97	5541	164.108	150	12787.9	11641	336464	291457	42.4417	42.29	2360.33	2262
FMT-2	Week 2	run 2	54496464	62273108966	1142.7	4784	140.855	131	10729.8	9640	272616	241168	42.3584	42.27	2227.35	2133
FMT-2	Week 4	run 1	80958118	81805233361	1010.46	4071	228.55	193	12189.2	9149	423898	295914	44.6557	44.61	1961.46	1628
FMT-2	Week 4	run 2	71367751	79953004272	1120.3	2937	164.864	146	15601.9	14156	393523	314414	44.2216	44.35	2809.06	2647
VAN-1	Before Vancomycin treatment	run 1	82780157	166379837206	2009.9	1646	222.087	201	42441.4	33450	1.24778e+06	1131502	42.5926	42.03	7564.52	7540.5
VAN-1	Week 2	run 1	104904569	144264763055	1375.2	2032	214.105	205	51200	32678	916614	822888	45.6517	42.62	6440.59	5962
VAN-2	Before Vancomycin treatment	run 1	55946119	55311689673	988.66	2617	108.029	92	10672.2	9248	208532	156477	42.2128	42.32	2409.16	2218
VAN-2	Before Vancomycin treatment	run 2	51376985	68434144496	1332	3026	145	91	9675.77	8154.5	266712	153214	45.5069	43.06	2095.94	1947.5
VAN-2	Week 2	run 1	76727611	67267096999	876.7	7218	223.538	189	9295.16	6569.5	316173	248861	42.4272	43.01	1522.98	1393
VAN-2	Week 2	run 2	71032544	74919170780	1054.72	4113	176.273	164	14431.3	13039	379496	335808	41.8525	42.64	2534.47	2377.5
VAN-2	Week 4	run 1	72285467	73550463055	1017.5	2006	490.536	459.5	14942.5	13126.5	870732	749656	40.2264	41.86	2142.72	2030.5
VAN-2	Week 4	run 2	66731472	63670764591	954.134	2206	282.282	209	8485.02	5508.5	429212	215924	41.1589	41.55	1451.26	1087
VAN-2	Week 4	run 3	70596413	83522921310	1183.1	1671	241.097	195	15355.7	15008.5	628103	505120	53.5127	58.215	3201.72	3125.5
VAN-2	Week 4	run 4	46967055	53789044179	1145.25	1564	203.41	174.5	15408.5	14941.5	553987	466376	53.578	58.34	3280.3	3189.5

## Sheet: CDI_nnotation_info
SAG barcode	species	GCA	ANI	db	Patient	condition
CAAGAAA_CGTAGCA_ACGATAC	Escherichia coli	GCF_027945035.1	100	refseq	FMT-1	Pretreatment
CCTACAC_TTAGGAC_AACTCTT	Escherichia coli	GCF_905330275.2	100	refseq	FMT-1	Pretreatment
GCTCTGT_GATCGTA_TCGTAGA	Phocaeicola vulgatus	GCF_024022975.1	100	refseq	FMT-1	Pretreatment
CGGAGCT_ACCAAGT_AAATGAG	Phocaeicola vulgatus	GCF_024758205.1	100	refseq	FMT-1	Pretreatment
AACCGCG_CATATCG_CGATTAT	Phocaeicola vulgatus	GCF_008728395.1	100	refseq	FMT-1	Pretreatment
AAGACCT_ACGCAGA_TTGCCGT	Anaerostipes caccae	GCF_014131675.1	100	refseq	FMT-1	Pretreatment
GACGTTA_AGTTACG_GACGTTA	Phocaeicola vulgatus	GCF_024758205.1	100	refseq	FMT-1	Pretreatment
GACGTTA_TCACGAA_GCATGAT	Parabacteroides distasonis	GCF_024759645.1	100	refseq	FMT-1	Pretreatment
CGATGGC_AGACATA_TTCGGAC	Mediterraneibacter gnavus	GCF_009831375.1	100	refseq	FMT-1	Pretreatment
GACGTTA_GCGATCA_GAACCTA	Blautia producta	GCF_014131715.1	100	refseq	FMT-1	Pretreatment
AGGCCAC_GGAGCAA_GGGCTAA	Phocaeicola vulgatus	GCF_020091465.1	100	refseq	FMT-1	Pretreatment
ACTGATG_CGTGTCT_CTTGGCT	Clostridioides difficile	GCF_003482065.1	100	refseq	FMT-1	Pretreatment
GACCTGG_TTGACTC_GAAATGA	Prevotella scopos	GCF_018127785.1	100	refseq	FMT-1	Pretreatment
TTAGGCA_CGGTTAA_TGACGGC	Phocaeicola vulgatus	GCF_020091465.1	100	refseq	FMT-1	Pretreatment
TATCTCA_GTTCATT_GCCAAAT	Wansuia hejianensis	GCF_014337215.1	100	refseq	FMT-1	Pretreatment
TTTATGC_GACTGTC_AGCGGTC	Mediterraneibacter gnavus	GCF_009831375.1	100	refseq	FMT-1	Pretreatment
TCAGGAT_TTGGAAC_GGGCTAA	Bacteroides thetaiotaomicron	GCF_018289275.1	100	refseq	FMT-1	Pretreatment
TCGTAGA_CGGTTAA_ATTACTC	Amedibacterium intestinale	GCF_010537155.1	100	refseq	FMT-1	Pretreatment
TGCTGCT_GAAACTC_TCTCAGC	Thomasclavelia ramosa	GCF_016027135.1	100	refseq	FMT-1	Pretreatment
CGCTTCA_AGCCTAA_GACCTGG	Bacteroides uniformis	GCF_018291785.1	99.96	refseq	FMT-1	Pretreatment
GAAATGA_GTTCATT_TGGGAAG	Bacteroides uniformis	GCF_018291785.1	99.95	refseq	FMT-1	Pretreatment
GACGTTA_AGCCTAA_ACTACCT	Phocaeicola vulgatus	GCF_020091465.1	99.95	refseq	FMT-1	Pretreatment
TCGTAGA_ACTTTCA_TCAACGA	Phocaeicola vulgatus	GCF_000012825.1	99.95	refseq	FMT-1	Pretreatment
TCTTCGG_ACAACAC_ATAAGGG	Escherichia coli	GCF_024396575.1	99.94	refseq	FMT-1	Pretreatment
GTGTTAG_AAGACCT_TACTCAT	Phocaeicola vulgatus	GCF_018289355.1	99.94	refseq	FMT-1	Pretreatment
GTTCATT_GCGCGAT_TTTGCGC	Bacteroides eggerthii	GCF_025146565.1	99.94	refseq	FMT-1	Pretreatment
ACTTGTT_GTCGTAA_AGTGGGA	Phocaeicola vulgatus	GCF_020091465.1	99.93	refseq	FMT-1	Pretreatment
CAGAGAG_CAAGTTG_AAACAAC	Phocaeicola vulgatus	GCF_024022975.1	99.93	refseq	FMT-1	Pretreatment
ACCAGTA_TAGGCAT_GGATGTT	Eggerthella lenta	GCF_021378705.1	99.93	refseq	FMT-1	Pretreatment
GCATGCG_AACCATG_CATTCGC	Anaerostipes caccae	GCF_020181435.1	99.92	refseq	FMT-1	Pretreatment
CAGAGAG_GCGCGAT_CATAACT	Phocaeicola vulgatus	GCF_024758205.1	99.92	refseq	FMT-1	Pretreatment
TCTTCGG_GCACATA_GACCTGG	Phocaeicola vulgatus	GCF_024758205.1	99.91	refseq	FMT-1	Pretreatment
GGGCACT_GACCAAT_TGGGAAG	Phocaeicola vulgatus	GCF_000012825.1	99.91	refseq	FMT-1	Pretreatment
GTGGGTC_CGCGGTA_CGGAGTC	Phocaeicola vulgatus	GCF_000012825.1	99.91	refseq	FMT-1	Pretreatment
TCAGCTC_GTATAAG_GCTGGGT	Escherichia coli	GCF_013372305.1	99.9	refseq	FMT-1	Pretreatment
ACTTGTT_CGGTTAA_GTTGCTT	Eggerthella lenta	GCF_000024265.1	99.89	refseq	FMT-1	Pretreatment
CAGTCCT_TTAGGAC_AGAATCT	Phocaeicola vulgatus	GCF_024758205.1	99.89	refseq	FMT-1	Pretreatment
TTAGGCA_TTGACTC_GGAACTT	Escherichia coli	GCF_904864635.1	99.89	refseq	FMT-1	Pretreatment
TGCCAAA_TTTGCCA_CAGCAGC	Citrobacter sp.	GCF_013747275.1	99.89	refseq	FMT-1	Pretreatment
TACACGA_GGAGCAA_CGTTAGA	Escherichia coli	GCF_030996425.1	99.88	refseq	FMT-1	Pretreatment
TTGAACG_GGGCACT_AAACAAC	Phocaeicola vulgatus	GCF_000012825.1	99.88	refseq	FMT-1	Pretreatment
CTTCTCT_ACGTAAA_GAAATGA	Shigella flexneri	GCF_007197595.1	99.87	refseq	FMT-1	Pretreatment
CGAGAAG_CGCGGTA_GGATGTT	Phocaeicola vulgatus	GCF_018289355.1	99.87	refseq	FMT-1	Pretreatment
AGTAGTC_TTAGGAC_GTATCTT	Phocaeicola vulgatus	GCF_000012825.1	99.87	refseq	FMT-1	Pretreatment
CATTATC_GGCCGAT_AGAAAGG	Escherichia coli	GCF_030515535.1	99.87	refseq	FMT-1	Pretreatment
TCAGGAT_CACTCCA_AACTCTT	Escherichia coli	GCF_013085905.2	99.87	refseq	FMT-1	Pretreatment
AGTAGTC_TAGGCAT_TCAGATG	Eggerthella lenta	GCF_021378725.1	99.86	refseq	FMT-1	Pretreatment
CGTGAGC_ACTTTCA_TGAGAGG	Shigella flexneri	GCF_007197595.1	99.86	refseq	FMT-1	Pretreatment
GTGTTAG_TCTATTG_AGGGCTT	Phocaeicola vulgatus	GCF_020091465.1	99.86	refseq	FMT-1	Pretreatment
GGCTCGA_ACGCAGA_CATTCGC	Phocaeicola vulgatus	GCF_020091465.1	99.86	refseq	FMT-1	Pretreatment
AAGACCT_GAGTCCG_CGACTTC	Phocaeicola vulgatus	GCF_024759565.1	99.85	refseq	FMT-1	Pretreatment
TCTCATA_TGTACCT_TCGTAGA	Phocaeicola vulgatus	GCF_020091465.1	99.85	refseq	FMT-1	Pretreatment
GACTACA_CATTCGC_AGAAAGG	Citrobacter sp.	GCF_013747275.1	99.84	refseq	FMT-1	Pretreatment
CGCTTCA_TGGCTGG_AGGAGGT	Adlercreutzia hattorii	GCF_011405655.1	99.84	refseq	FMT-1	Pretreatment
CGTAGCG_ATAAGAG_ATTTCTG	Escherichia coli	GCF_016889725.1	99.84	refseq	FMT-1	Pretreatment
TACACGA_AGCTATT_GCGCAAC	Escherichia coli	GCF_027944775.1	99.84	refseq	FMT-1	Pretreatment
GGCTCGA_AGCTATT_CGCGTTT	Escherichia coli	GCF_030995185.1	99.84	refseq	FMT-1	Pretreatment
GCAAACT_GGGCACT_CGGAGTC	Eggerthella lenta	GCF_021378705.1	99.83	refseq	FMT-1	Pretreatment
CAGCAGC_GTTCATT_CACACTC	Citrobacter sp.	GCF_013747275.1	99.83	refseq	FMT-1	Pretreatment
GTGTTAG_AACCATG_ACCGTAA	Citrobacter sp.	GCF_013747275.1	99.83	refseq	FMT-1	Pretreatment
GGGCACT_ACAACAC_CGGAGTC	[Clostridium] innocuum	GCF_012317185.1	99.83	refseq	FMT-1	Pretreatment
GTATCTT_CGTGTCT_AGCTCCT	Phocaeicola vulgatus	GCF_000012825.1	99.83	refseq	FMT-1	Pretreatment
GACTACA_CGTAGCA_AAAGATG	Citrobacter sp.	GCF_013747275.1	99.82	refseq	FMT-1	Pretreatment
ACCGTAA_AAATCCA_GACCTGG	Citrobacter sp.	GCF_013747275.1	99.82	refseq	FMT-1	Pretreatment
CAGCTAA_GTAACTG_TTCGGAC	Enterocloster bolteae	GCF_016889665.1	99.82	refseq	FMT-1	Pretreatment
AAACCTG_TTAGGAC_CTTGGCT	Phocaeicola vulgatus	GCF_020091465.1	99.82	refseq	FMT-1	Pretreatment
AAACCTG_CGACGTT_AGGAGGT	Adlercreutzia hattorii	GCF_011405655.1	99.82	refseq	FMT-1	Pretreatment
TAGCCGG_GGGTTGC_CATATGG	Escherichia coli	GCF_030515535.1	99.82	refseq	FMT-1	Pretreatment
TGTGTTT_ATTGGAC_AGGGCTT	Citrobacter sp.	GCF_013791465.1	99.82	refseq	FMT-1	Pretreatment
AAGACCT_GGTAGTG_GGGTTGC	Phocaeicola vulgatus	GCF_024758205.1	99.81	refseq	FMT-1	Pretreatment
GCAAACT_CGAATGT_TTGCCGT	Eggerthella lenta	GCF_021378605.1	99.81	refseq	FMT-1	Pretreatment
CGTAGCG_AGGTGTA_CGCGTTT	Adlercreutzia hattorii	GCF_011405655.1	99.81	refseq	FMT-1	Pretreatment
ACTTTCA_GTGCGGT_TCCACAC	Citrobacter sp.	GCF_013747275.1	99.81	refseq	FMT-1	Pretreatment
TGAGCCG_GTATAAG_GTTGCTT	Escherichia coli	GCF_030988825.1	99.81	refseq	FMT-1	Pretreatment
AGGGTGA_CTCACAC_ACGATAC	Phocaeicola vulgatus	GCF_020091465.1	99.8	refseq	FMT-1	Pretreatment
TACACGA_TGAGCCG_TAGACCA	Escherichia coli	GCF_032295845.1	99.8	refseq	FMT-1	Pretreatment
GTGCAGC_CACCTTA_ATAAGGG	Faecalibacterium prausnitzii	GCF_003293635.1	99.8	refseq	FMT-1	Pretreatment
TAGCCGG_ATCATTC_GGCGACT	Escherichia coli	GCF_030988915.1	99.8	refseq	FMT-1	Pretreatment
AGGGTGA_TCGTCTT_CTCCTAG	Phocaeicola vulgatus	GCF_020091465.1	99.79	refseq	FMT-1	Pretreatment
ATGTGTG_TAAGAGA_CATATGG	Escherichia coli	GCF_025244805.1	99.79	refseq	FMT-1	Pretreatment
CTTAGGA_ACTGAAC_TGACGGC	Citrobacter sp.	GCF_013747275.1	99.79	refseq	FMT-1	Pretreatment
AAGGTTC_AAATCCA_GACCTGG	Escherichia coli	GCF_002237305.1	99.78	refseq	FMT-1	Pretreatment
AGCGTCG_AAACGTC_AAGGTTC	Citrobacter sp.	GCF_013747275.1	99.78	refseq	FMT-1	Pretreatment
TTCGGTC_GCGATCA_GTGTGCG	Phocaeicola vulgatus	GCF_008728395.1	99.78	refseq	FMT-1	Pretreatment
CTAATGG_TTGACTC_CGATTAT	Escherichia coli	GCF_024396555.1	99.77	refseq	FMT-1	Pretreatment
CGTTCTG_TACTTGT_GGGTTGC	Mediterraneibacter gnavus	GCF_030167985.1	99.77	refseq	FMT-1	Pretreatment
ACCAGTA_TAAGAGA_TTTGCGC	Phocaeicola vulgatus	GCF_024758205.1	99.77	refseq	FMT-1	Pretreatment
GATCGAT_GTCGTAA_GTAATCG	Escherichia coli	GCF_026248865.1	99.77	refseq	FMT-1	Pretreatment
ACTGATG_ACGAGGA_AGTGGGA	Escherichia coli	GCF_019443605.1	99.77	refseq	FMT-1	Pretreatment
TCGTAGA_CACTCCA_GGCGACT	Eggerthella lenta	GCF_021378685.1	99.77	refseq	FMT-1	Pretreatment
GGCTCGA_TTAGGAC_GCGGGTT	Escherichia coli	GCF_036884625.1	99.77	refseq	FMT-1	Pretreatment
GTGGGTC_GTGAAGG_TTAGGCA	Phocaeicola vulgatus	GCF_024759565.1	99.77	refseq	FMT-1	Pretreatment
TCTTCGG_GTTCTCG_GTTGCTT	Escherichia coli	GCF_034644215.1	99.77	refseq	FMT-1	Pretreatment
AGGGTGA_CGTGTCT_ACCGTAA	Heyndrickxia coagulans	GCF_019443305.1	99.76	refseq	FMT-1	Pretreatment
GACCTGG_TGAGGGA_GATCTAG	Anaerotruncus colihominis	GCF_023008305.1	99.76	refseq	FMT-1	Pretreatment
GCTCTGT_TGGCTGG_GAACCTA	Citrobacter sp.	GCF_013747275.1	99.76	refseq	FMT-1	Pretreatment
TACGGGC_GAATGAA_CGAACAT	Phocaeicola vulgatus	GCF_020091465.1	99.76	refseq	FMT-1	Pretreatment
TAGCCGG_GGAAAGC_GGTAGTG	Shouchella clausii	GCF_002250115.1	99.76	refseq	FMT-1	Pretreatment
TTTATGC_CTCAATA_GGCGACT	Escherichia coli	GCF_032295845.1	99.76	refseq	FMT-1	Pretreatment
CAGAGAG_GTCGTAA_TTGGCAA	Escherichia coli	GCF_026248865.1	99.75	refseq	FMT-1	Pretreatment
GCGCCAA_CGAATGT_TGGCGCA	Escherichia coli	GCF_027945095.1	99.75	refseq	FMT-1	Pretreatment
CAGAGAG_TGCTTGC_TAGACCA	Phocaeicola vulgatus	GCF_020091465.1	99.75	refseq	FMT-1	Pretreatment
CTAAGAC_CACAAGG_CGTTAGA	Eggerthella lenta	GCF_022845935.1	99.75	refseq	FMT-1	Pretreatment
GCATGCG_ACGTAAA_GGGTTGC	Eggerthella lenta	GCF_021378605.1	99.75	refseq	FMT-1	Pretreatment
CGTGAGC_GCGCGAT_TACTCAT	Alistipes finegoldii	GCF_022846055.1	99.75	refseq	FMT-1	Pretreatment
TTTACTG_ACTGAAC_TTAGGCA	Citrobacter sp.	GCF_013747275.1	99.75	refseq	FMT-1	Pretreatment
TTGAACG_CGAATGT_TGGCGCA	Escherichia coli	GCF_012149945.1	99.75	refseq	FMT-1	Pretreatment
GGCTCGA_CTCCTAG_TTGGCAA	Phocaeicola vulgatus	GCF_024022975.1	99.75	refseq	FMT-1	Pretreatment
GGCTCGA_GTATAAG_TACTCAT	Escherichia coli	GCF_032295845.1	99.75	refseq	FMT-1	Pretreatment
TCACGAA_AATCGGT_CGTTAGA	Eggerthella lenta	GCF_021378705.1	99.75	refseq	FMT-1	Pretreatment
GGCAATT_AGCCTAA_AGCGGTC	Escherichia coli	GCF_030515255.1	99.75	refseq	FMT-1	Pretreatment
TCTTCGG_TGAGCCG_ACTACCT	Phocaeicola vulgatus	GCF_020091465.1	99.75	refseq	FMT-1	Pretreatment
GGAAAGC_AGGTGTA_ACGCAGC	Citrobacter sp.	GCF_013747275.1	99.75	refseq	FMT-1	Pretreatment
TGAGCCG_CACACCT_GTATCTT	Anaerotruncus colihominis	GCF_023008305.1	99.75	refseq	FMT-1	Pretreatment
CTGCCTA_CAGGTGC_AAAGATG	Anaerostipes caccae	GCF_036419175.1	99.74	refseq	FMT-1	Pretreatment
AACCGCG_GTGAAGG_ACTGAGT	Eggerthella lenta	GCF_021378705.1	99.74	refseq	FMT-1	Pretreatment
ACTTGTT_TCGTCTT_CACAAAC	Phocaeicola vulgatus	GCF_024758205.1	99.74	refseq	FMT-1	Pretreatment
CGTGAGC_CTCAATA_GCGCAAC	Eggerthella lenta	GCF_022845935.1	99.74	refseq	FMT-1	Pretreatment
CGGAGCT_GACGTGC_CATAACT	Escherichia coli	GCF_036884625.1	99.74	refseq	FMT-1	Pretreatment
AGTAGTC_GTCGTAA_TGACGGC	Phocaeicola vulgatus	GCF_018289355.1	99.74	refseq	FMT-1	Pretreatment
ATCACGA_CGTAGCA_GTGCTTC	Escherichia coli	GCF_022494745.1	99.74	refseq	FMT-1	Pretreatment
ATGTGTG_GATCGTA_TCCACAC	Phocaeicola vulgatus	GCF_024758205.1	99.74	refseq	FMT-1	Pretreatment
CTAATGG_ATTGGAC_CATTCGC	Phocaeicola vulgatus	GCF_024758205.1	99.74	refseq	FMT-1	Pretreatment
CAGTCCT_TTAGGAC_GCCAAAT	Phocaeicola vulgatus	GCF_024759565.1	99.74	refseq	FMT-1	Pretreatment
CTTAGGA_ATTGGAC_CTCCTAG	Citrobacter sp.	GCF_013747275.1	99.74	refseq	FMT-1	Pretreatment
TCTCATA_AATCGGT_GGAGCAA	Escherichia coli	GCF_025244805.1	99.74	refseq	FMT-1	Pretreatment
TCAGCTC_CAAGTTG_TGGCGCA	Bacteroides thetaiotaomicron	GCF_018289275.1	99.74	refseq	FMT-1	Pretreatment
AAACCTG_GACGTGC_CGCTATC	Phocaeicola vulgatus	GCF_024759565.1	99.73	refseq	FMT-1	Pretreatment
GGTATTG_CGTTGGG_TTAGGCA	Adlercreutzia hattorii	GCF_011405655.1	99.73	refseq	FMT-1	Pretreatment
TCACGAA_AGCTATT_ACTGAGT	Citrobacter sp.	GCF_013791465.1	99.73	refseq	FMT-1	Pretreatment
TGCTGCT_GTAACTG_TACAGTG	Bacteroides caecimuris	GCF_001688725.2	99.73	refseq	FMT-1	Pretreatment
GACTACA_GGAAAGC_GATCAGT	Heyndrickxia coagulans	GCF_019443305.1	99.72	refseq	FMT-1	Pretreatment
CGCTTCA_CAAGTTG_AAATGAG	Enterocloster bolteae	GCF_002234575.2	99.72	refseq	FMT-1	Pretreatment
CTAATGG_AAACGTC_AGTAGTC	Phocaeicola vulgatus	GCF_020091465.1	99.72	refseq	FMT-1	Pretreatment
TATCTCA_GAGTCCG_GCGCAAC	Phocaeicola vulgatus	GCF_020091465.1	99.72	refseq	FMT-1	Pretreatment
CGCTTCA_GCACATA_TAAGCGT	Escherichia coli	GCF_030995185.1	99.71	refseq	FMT-1	Pretreatment
CTTAGGA_GCGCGAT_TGGCGCA	Escherichia coli	GCF_025244805.1	99.71	refseq	FMT-1	Pretreatment
CTAGCCT_CAGGTGC_AGGGCTT	Anaerostipes caccae	GCF_036419175.1	99.71	refseq	FMT-1	Pretreatment
GAAATGA_CGGAGCT_ACTGAGT	Escherichia coli	GCF_027945035.1	99.71	refseq	FMT-1	Pretreatment
ATCACGA_CAGATCA_CGCTATC	Citrobacter sp.	GCF_013747275.1	99.71	refseq	FMT-1	Pretreatment
ACCGTAA_AAACGTC_CGTAGCG	Phocaeicola vulgatus	GCF_020091465.1	99.71	refseq	FMT-1	Pretreatment
CAAGAAA_CACCTTA_AGCGGTC	Citrobacter sp.	GCF_013747275.1	99.71	refseq	FMT-1	Pretreatment
TGTGTTT_TACTTGT_TCGAGGC	Phocaeicola vulgatus	GCF_020091465.1	99.71	refseq	FMT-1	Pretreatment
GGGCACT_GGAAAGC_GGCGACT	Anaerostipes caccae	GCF_036419175.1	99.71	refseq	FMT-1	Pretreatment
TGCTGCT_CGTAGCA_CACACTC	Anaerostipes caccae	GCF_036419175.1	99.71	refseq	FMT-1	Pretreatment
TCAGCTC_AGACATA_AGAATCT	Enterocloster bolteae	GCF_016889665.1	99.71	refseq	FMT-1	Pretreatment
TTCGGTC_TCACGAA_ACACTGA	Escherichia coli	GCF_027945035.1	99.71	refseq	FMT-1	Pretreatment
ATCACGA_CGTAGCA_AATCTTG	Eggerthella lenta	GCF_002148255.1	99.7	refseq	FMT-1	Pretreatment
ATGTGTG_GTATAAG_CATATGG	Phocaeicola vulgatus	GCF_024758205.1	99.7	refseq	FMT-1	Pretreatment
AAGACCT_CACACCT_AAGGTTC	Thomasclavelia ramosa	GCF_016027135.1	99.7	refseq	FMT-1	Pretreatment
TCGGGAC_TCTGAGA_GTTGCTT	Phocaeicola vulgatus	GCF_000012825.1	99.7	refseq	FMT-1	Pretreatment
GTATCTT_CACACCT_ACCGTAA	Phocaeicola vulgatus	GCF_024022975.1	99.7	refseq	FMT-1	Pretreatment
TGCTGCT_CGATGTA_GTGTGCG	Anaerostipes caccae	GCF_036419175.1	99.7	refseq	FMT-1	Pretreatment
GGGCACT_ACGTAAA_GCGCAAC	Phocaeicola vulgatus	GCF_024758205.1	99.7	refseq	FMT-1	Pretreatment
GCATGCG_TTGACTC_ACGATAC	Escherichia coli	GCF_032295845.1	99.69	refseq	FMT-1	Pretreatment
ACTGATG_TGACTTT_AACTCTT	Eggerthella lenta	GCF_021378705.1	99.69	refseq	FMT-1	Pretreatment
ATCTACT_TTCGAAG_CTGAAAC	Citrobacter sp.	GCF_013747275.1	99.69	refseq	FMT-1	Pretreatment
CGTAGCG_GCCTCTA_AACTCTT	Escherichia coli	GCF_012149945.1	99.69	refseq	FMT-1	Pretreatment
AGGGTGA_TAAGAGA_GATCTAG	Escherichia coli	GCF_003344465.1	99.69	refseq	FMT-1	Pretreatment
TGAGCCG_GATCGTA_TACTCAT	Blautia coccoides	GCF_034355335.1	99.69	refseq	FMT-1	Pretreatment
GGGCACT_GTATAAG_CTAAGAC	Escherichia coli	GCF_030988915.1	99.69	refseq	FMT-1	Pretreatment
TTGCGTC_CGTAGCA_AGCGGTC	Escherichia coli	GCF_032295845.1	99.69	refseq	FMT-1	Pretreatment
GGCAATT_TGGCTGG_TCTTCGG	Citrobacter sp.	GCF_013747275.1	99.69	refseq	FMT-1	Pretreatment
CTTAGGA_AGCGTCG_ATCCGAA	Escherichia coli	GCF_026248865.1	99.68	refseq	FMT-1	Pretreatment
CGCTTCA_CGTAGCA_CGCGTTT	Escherichia coli	GCF_030515255.1	99.68	refseq	FMT-1	Pretreatment
AGCGTCG_ACTTTCA_GTTGCTT	Anaerotruncus colihominis	GCF_023008305.1	99.68	refseq	FMT-1	Pretreatment
CTTAGGA_ATCATTC_TGGGAAG	Enterocloster bolteae	GCF_002234575.2	99.68	refseq	FMT-1	Pretreatment
GCAAACT_CTCCTAG_CATATGG	Phocaeicola vulgatus	GCF_036419465.1	99.68	refseq	FMT-1	Pretreatment
CGATGGC_ACGTAAA_TGGGAAG	Escherichia coli	GCF_022494745.1	99.68	refseq	FMT-1	Pretreatment
CAGCAGC_CGGAGCT_ATTTCTG	Escherichia coli	GCF_032295845.1	99.68	refseq	FMT-1	Pretreatment
CTAAGAC_AGGTGTA_AGAAAGG	Eggerthella lenta	GCF_022845935.1	99.68	refseq	FMT-1	Pretreatment
CATTATC_TGTACCT_TAGACCA	Phocaeicola vulgatus	GCF_020885775.1	99.68	refseq	FMT-1	Pretreatment
CGAGAAG_CTTCTCT_GAACCTA	Citrobacter sp.	GCF_013791465.1	99.68	refseq	FMT-1	Pretreatment
ACCGTAA_GGAAAGC_ACGCAGC	Escherichia coli	GCF_030515255.1	99.68	refseq	FMT-1	Pretreatment
GGCTCGA_GTGCGGT_CTGAAAC	Enterocloster bolteae	GCF_016889665.1	99.68	refseq	FMT-1	Pretreatment
TTTATGC_GTAACTG_CGTTAGA	Escherichia coli	GCF_026074175.1	99.68	refseq	FMT-1	Pretreatment
TTAGGCA_GTCGTAA_ACGGCCA	Phocaeicola vulgatus	GCF_020091465.1	99.68	refseq	FMT-1	Pretreatment
TGCTGCT_GAATGAA_GGGCTAA	Escherichia coli	GCF_032295845.1	99.68	refseq	FMT-1	Pretreatment
GAGCAGA_TAAGAGA_CTTGGCT	Anaerotruncus colihominis	GCF_023008305.1	99.67	refseq	FMT-1	Pretreatment
GACTACA_AGTTACG_CTCCTAG	Phocaeicola vulgatus	GCF_024758205.1	99.67	refseq	FMT-1	Pretreatment
GCAAACT_GACGTGC_TTTGCGC	Eggerthella lenta	GCF_022845935.1	99.67	refseq	FMT-1	Pretreatment
GTATCTT_GACGTGC_CGGAGTC	Eggerthella lenta	GCF_021378685.1	99.67	refseq	FMT-1	Pretreatment
GTGCAGC_TACTTGT_AGCTCCT	Phocaeicola vulgatus	GCF_020091465.1	99.67	refseq	FMT-1	Pretreatment
TTTATGC_ACACCGG_ACTACCT	Phocaeicola vulgatus	GCF_020091465.1	99.67	refseq	FMT-1	Pretreatment
TGTGTTT_GCGCGAT_AGGGCTT	Phocaeicola vulgatus	GCF_018289355.1	99.67	refseq	FMT-1	Pretreatment
TCTCATA_AGCCTAA_TCTTCGG	Phocaeicola vulgatus	GCF_024758205.1	99.67	refseq	FMT-1	Pretreatment
CTAGCCT_TGGCTGG_TGACGGC	Escherichia coli	GCF_030515255.1	99.66	refseq	FMT-1	Pretreatment
CGATGGC_GTCGTAA_GACCTGG	Anaerostipes caccae	GCF_036419175.1	99.66	refseq	FMT-1	Pretreatment
CGTAGCG_GGGTTGC_AGCTCCT	Phocaeicola vulgatus	GCF_024758205.1	99.66	refseq	FMT-1	Pretreatment
CAAGAAA_CGTAGCA_CGCTATC	Anaerostipes caccae	GCF_036419175.1	99.66	refseq	FMT-1	Pretreatment
CTCGGAG_CACACCT_TGATTTC	Blautia coccoides	GCF_034355335.1	99.66	refseq	FMT-1	Pretreatment
CAGCTAA_TCAGATG_ATTCTAC	Eggerthella lenta	GCF_021378705.1	99.66	refseq	FMT-1	Pretreatment
GCTCTGT_CTTCTCT_TGACGGC	Enterocloster bolteae	GCF_016889665.1	99.66	refseq	FMT-1	Pretreatment
CACACAA_ATAAGAG_CATAACT	Anaerotruncus colihominis	GCF_023008305.1	99.66	refseq	FMT-1	Pretreatment
CAAGAAA_TGAGGGA_GACCTGG	Eggerthella lenta	GCF_022845935.1	99.66	refseq	FMT-1	Pretreatment
GTTCATT_GAATGAA_GGCGACT	Phocaeicola vulgatus	GCF_020091465.1	99.66	refseq	FMT-1	Pretreatment
TTGAACG_ACGCAGA_TGGGAAG	Anaerotruncus colihominis	GCF_023008305.1	99.66	refseq	FMT-1	Pretreatment
TGGCGCA_CAAGTTG_CGGAGTC	Enterocloster bolteae	GCF_016889665.1	99.66	refseq	FMT-1	Pretreatment
CACATTT_ACAACAC_CATAACT	Anaerostipes caccae	GCF_025146005.1	99.65	refseq	FMT-1	Pretreatment
ACTTGTT_GTTCATT_GGTAGTG	Thomasclavelia ramosa	GCF_020097255.1	99.65	refseq	FMT-1	Pretreatment
TGAGCCG_CAGATCA_GGTAGTG	Thomasclavelia ramosa	GCF_016728785.1	99.65	refseq	FMT-1	Pretreatment
TCTCATA_AATCGGT_GAAATGA	Phocaeicola vulgatus	GCF_020091465.1	99.65	refseq	FMT-1	Pretreatment
TACTTAC_CAGATCA_GGTAGTG	Phocaeicola vulgatus	GCF_018289355.1	99.65	refseq	FMT-1	Pretreatment
GGACGTC_CACCTTA_GCATGAT	Bacteroides thetaiotaomicron	GCF_024759205.1	99.65	refseq	FMT-1	Pretreatment
TGAGCCG_ACTGAAC_CTTGGCT	Anaerostipes caccae	GCF_036419175.1	99.65	refseq	FMT-1	Pretreatment
ATCTACT_GACTGTC_AGCGGTC	Phocaeicola vulgatus	GCF_020091465.1	99.64	refseq	FMT-1	Pretreatment
AGAGCTT_GCGATCA_AGAATCT	Thomasclavelia ramosa	GCF_014131695.1	99.64	refseq	FMT-1	Pretreatment
TTGAACG_ACCAAGT_CACACTC	Phocaeicola vulgatus	GCF_020091465.1	99.64	refseq	FMT-1	Pretreatment
TCTTCGG_TAGGCAT_GGCGACT	Eggerthella lenta	GCF_021378705.1	99.64	refseq	FMT-1	Pretreatment
ATCACGA_AACTCAG_TCTTCGG	Eggerthella lenta	GCF_000024265.1	99.63	refseq	FMT-1	Pretreatment
CAGAGAG_GAGTCCG_AGAAAGG	Eggerthella lenta	GCF_021378605.1	99.63	refseq	FMT-1	Pretreatment
AGCTCTC_TTAGGAC_AAAGATG	Phocaeicola vulgatus	GCF_020091465.1	99.63	refseq	FMT-1	Pretreatment
AACCGCG_GAAACTC_ATTCTAC	Hungatella hathewayi	GCF_025149285.1	99.63	refseq	FMT-1	Pretreatment
CTGCCTA_ACCAAGT_TCCACAC	Eggerthella lenta	GCF_021378705.1	99.63	refseq	FMT-1	Pretreatment
GCATGCG_GACCAAT_GGATGTT	Escherichia coli	GCF_030988915.1	99.62	refseq	FMT-1	Pretreatment
CTAATGG_AGGTGTA_AAACAAC	Eggerthella lenta	GCF_021378705.1	99.62	refseq	FMT-1	Pretreatment
GACGTTA_GAATGAA_CACAAAC	Eggerthella lenta	GCF_000024265.1	99.62	refseq	FMT-1	Pretreatment
AGGCCAC_CAGGTGC_CGATTAT	Anaerostipes caccae	GCF_036419175.1	99.62	refseq	FMT-1	Pretreatment
CTCTACG_TGGCTGG_TTTGCGC	Anaerotruncus colihominis	GCF_023008305.1	99.62	refseq	FMT-1	Pretreatment
CAGCTAA_GCCTCTA_GCATGAT	Citrobacter sp.	GCF_013747275.1	99.62	refseq	FMT-1	Pretreatment
GAAATGA_GCGCGAT_ATTACTC	[Clostridium] innocuum	GCF_012317185.1	99.62	refseq	FMT-1	Pretreatment
TGGCGCA_AGCGTCG_TGGACGC	Escherichia coli	GCF_024917535.1	99.62	refseq	FMT-1	Pretreatment
TACACGA_TGAGGGA_CGCTATC	Phocaeicola vulgatus	GCF_020091465.1	99.62	refseq	FMT-1	Pretreatment
TGTGTTT_GAGTCCG_AAGGTTC	Phocaeicola vulgatus	GCF_024022975.1	99.62	refseq	FMT-1	Pretreatment
TCAGCTC_CACCTTA_CTCCTAG	Anaerostipes caccae	GCF_036419175.1	99.62	refseq	FMT-1	Pretreatment
TCTCATA_GCCTCTA_GGGCTAA	Escherichia coli	GCF_030995185.1	99.62	refseq	FMT-1	Pretreatment
GGCAATT_TTCGAAG_CAGTAAC	Citrobacter sp.	GCF_013747275.1	99.62	refseq	FMT-1	Pretreatment
TAGCCGG_GCGATCA_AGTAGTC	Phocaeicola vulgatus	GCF_024022975.1	99.62	refseq	FMT-1	Pretreatment
GGAAAGC_AGGTGTA_GCCAAAT	Phocaeicola vulgatus	GCF_008728395.1	99.62	refseq	FMT-1	Pretreatment
GGACGTC_CGTGTCT_TAGACCA	Eggerthella lenta	GCF_021378645.1	99.62	refseq	FMT-1	Pretreatment
TGCTGCT_AGGTGTA_GCGGGTT	Eggerthella lenta	GCF_022845935.1	99.62	refseq	FMT-1	Pretreatment
ACGATAC_CTCAATA_TAAGCGT	Anaerostipes caccae	GCF_036419175.1	99.61	refseq	FMT-1	Pretreatment
CCTACAC_GCATACA_CGTAGCG	Thomasclavelia ramosa	GCF_014131695.1	99.61	refseq	FMT-1	Pretreatment
CGATGGC_GTTCTCG_GTTGCTT	Anaerostipes caccae	GCF_036419175.1	99.61	refseq	FMT-1	Pretreatment
AGTAGTC_GGCCGAT_GCATGAT	Anaerostipes caccae	GCF_036419175.1	99.61	refseq	FMT-1	Pretreatment
AGCTCTC_GACTGTC_GAAATGA	Anaerostipes caccae	GCF_036419175.1	99.61	refseq	FMT-1	Pretreatment
CGAGAAG_AAGACCT_CAGTAAC	Enterocloster bolteae	GCF_002234575.2	99.61	refseq	FMT-1	Pretreatment
CTAAGAC_CGACGTT_TGGCGCA	Phocaeicola vulgatus	GCF_024759565.1	99.61	refseq	FMT-1	Pretreatment
GAGCAGA_CACTCCA_GGATGTT	Eggerthella lenta	GCF_022845935.1	99.61	refseq	FMT-1	Pretreatment
GAAATGA_CGGAGCT_TTGGCAA	Enterocloster bolteae	GCF_016889665.1	99.61	refseq	FMT-1	Pretreatment
TTAGGCA_GAGTCCG_GCACTCT	Eggerthella lenta	GCF_021378725.1	99.61	refseq	FMT-1	Pretreatment
TCTCATA_TTAGGAC_AGAATCT	Amedibacterium intestinale	GCF_010537155.1	99.61	refseq	FMT-1	Pretreatment
TGTGTTT_TACTTGT_CAGTAAC	Enterocloster bolteae	GCF_016889665.1	99.61	refseq	FMT-1	Pretreatment
ACCGTAA_GGGTTGC_CGAACAT	Anaerostipes caccae	GCF_036419175.1	99.6	refseq	FMT-1	Pretreatment
ATCACGA_GGTAGTG_TCGTAGA	Anaerostipes caccae	GCF_036419175.1	99.6	refseq	FMT-1	Pretreatment
GACTACA_CACAAGG_AGGAGGT	Anaerostipes caccae	GCF_020181435.1	99.6	refseq	FMT-1	Pretreatment
GCTGCAG_ACGCAGA_CGTTAGA	Thomasclavelia ramosa	GCF_016027135.1	99.6	refseq	FMT-1	Pretreatment
CGGAGCT_CACCTTA_ACCGTAA	Eggerthella lenta	GCF_021378605.1	99.6	refseq	FMT-1	Pretreatment
CAGCTAA_TCAGATG_GTATCTT	Phocaeicola vulgatus	GCF_036419465.1	99.6	refseq	FMT-1	Pretreatment
AGTAGTC_GTGAAGG_GGAACTT	Phocaeicola vulgatus	GCF_024758205.1	99.6	refseq	FMT-1	Pretreatment
TGGCGCA_ACGGGTC_GATCAGT	Enterococcus faecium	GCF_900639635.1	99.6	refseq	FMT-1	Pretreatment
CAAGAAA_GTCGTAA_AATCTTG	Phocaeicola vulgatus	GCF_020885715.1	99.59	refseq	FMT-1	Pretreatment
ACTGATG_GGGCACT_TACAGTG	Phocaeicola vulgatus	GCF_024022975.1	99.59	refseq	FMT-1	Pretreatment
CTCTACG_GCGATCA_AACTCTT	Eggerthella lenta	GCF_021378705.1	99.59	refseq	FMT-1	Pretreatment
ACCAGTA_TGCTTGC_CATATGG	Enterocloster bolteae	GCF_016889665.1	99.59	refseq	FMT-1	Pretreatment
CTAAGAC_TAGGCAT_TGACGGC	Enterocloster bolteae	GCF_002234575.2	99.59	refseq	FMT-1	Pretreatment
GTGGGTC_GGGCACT_CAGCAGC	Eggerthella lenta	GCF_000024265.1	99.59	refseq	FMT-1	Pretreatment
CTTAGGA_CAAGTTG_GCTGGGT	Eggerthella lenta	GCF_021378685.1	99.58	refseq	FMT-1	Pretreatment
AACCGCG_CGGAGCT_AACTCTT	Phocaeicola vulgatus	GCF_020091465.1	99.58	refseq	FMT-1	Pretreatment
CACACAA_GTAACTG_CGAACAT	Phocaeicola vulgatus	GCF_024758205.1	99.58	refseq	FMT-1	Pretreatment
CTCTACG_CACTCCA_CATTCGC	Eggerthella lenta	GCF_022845935.1	99.58	refseq	FMT-1	Pretreatment
AGGGTGA_AACTCAG_ATTCTAC	Phocaeicola vulgatus	GCF_020091465.1	99.58	refseq	FMT-1	Pretreatment
CTCTACG_CATATCG_GACGTTA	Thomasclavelia ramosa	GCF_016027135.1	99.58	refseq	FMT-1	Pretreatment
CTAAGAC_GCACATA_GGGTTGC	Thomasclavelia ramosa	GCF_014131695.1	99.58	refseq	FMT-1	Pretreatment
ACTGATG_GCCTCTA_TGGGAAG	Phocaeicola vulgatus	GCF_020091465.1	99.58	refseq	FMT-1	Pretreatment
GACCTGG_CTGCCTA_CTGAAAC	Phocaeicola vulgatus	GCF_018289355.1	99.58	refseq	FMT-1	Pretreatment
GCAGCCA_CAAGTTG_AAACAAC	Phocaeicola vulgatus	GCF_024759565.1	99.58	refseq	FMT-1	Pretreatment
TGTGTTT_GACCAAT_GATCTAG	[Clostridium] innocuum	GCF_012317185.1	99.58	refseq	FMT-1	Pretreatment
GGTATTG_CGACGTT_TTGCCGT	Phocaeicola vulgatus	GCF_008728395.1	99.58	refseq	FMT-1	Pretreatment
TCAGCTC_TTCGAAG_CTAAGAC	Eggerthella lenta	GCF_000024265.1	99.58	refseq	FMT-1	Pretreatment
GTGGGTC_CTCTACG_CATATGG	Phocaeicola vulgatus	GCF_024758205.1	99.58	refseq	FMT-1	Pretreatment
CGCTTCA_TGGCTGG_GGAGCAA	Blautia coccoides	GCF_034355335.1	99.57	refseq	FMT-1	Pretreatment
ACGCCGA_CGCGGTA_AAACAAC	Phocaeicola vulgatus	GCF_036419465.1	99.57	refseq	FMT-1	Pretreatment
ATCACGA_CTCACAC_TGGACGC	Phocaeicola vulgatus	GCF_024758205.1	99.57	refseq	FMT-1	Pretreatment
ACCAGTA_TACTTGT_AAAGATG	Phocaeicola vulgatus	GCF_024759565.1	99.57	refseq	FMT-1	Pretreatment
TCGTAGA_AGTTACG_GGATGTT	Enterococcus faecium	GCF_900639635.1	99.57	refseq	FMT-1	Pretreatment
CGTTCTG_CGAATGT_AGCTCCT	Enterocloster bolteae	GCF_016889665.1	99.56	refseq	FMT-1	Pretreatment
GCAAACT_TCACGAA_TCGAGGC	Phocaeicola vulgatus	GCF_008728395.1	99.56	refseq	FMT-1	Pretreatment
CCTACAC_AACCATG_TTGGCAA	Eggerthella lenta	GCF_022845935.1	99.56	refseq	FMT-1	Pretreatment
CTGCCTA_TGGCTGG_CATATGG	Phocaeicola vulgatus	GCF_024758205.1	99.56	refseq	FMT-1	Pretreatment
ACGATAC_CTCACAC_GGCGACT	Phocaeicola vulgatus	GCF_024758205.1	99.56	refseq	FMT-1	Pretreatment
GTATCTT_CTCTACG_TACAGTG	Enterocloster bolteae	GCF_002234575.2	99.56	refseq	FMT-1	Pretreatment
GTAACGT_GTTCTCG_GTATCTT	Phocaeicola vulgatus	GCF_020091465.1	99.56	refseq	FMT-1	Pretreatment
GCTGGGT_TGAGCCG_GGAACTT	Anaerostipes caccae	GCF_036419175.1	99.55	refseq	FMT-1	Pretreatment
CAGCTAA_ATCATTC_GTATCTT	Anaerotruncus colihominis	GCF_023008305.1	99.55	refseq	FMT-1	Pretreatment
CGATGGC_GCATACA_GGGCTAA	Phocaeicola vulgatus	GCF_024758205.1	99.55	refseq	FMT-1	Pretreatment
ATGTGTG_GTCGTAA_ACACTGA	Eggerthella lenta	GCF_022845935.1	99.55	refseq	FMT-1	Pretreatment
CATTATC_ACTGAAC_TTAGGCA	Phocaeicola vulgatus	GCF_024758205.1	99.55	refseq	FMT-1	Pretreatment
GACGTTA_TCTGAGA_CGAACAT	Eggerthella lenta	GCF_021378645.1	99.55	refseq	FMT-1	Pretreatment
CTTCTCT_CGATGTA_TGACGGC	Thomasclavelia ramosa	GCF_016728785.1	99.55	refseq	FMT-1	Pretreatment
AGCGTCG_AGCTATT_AAATGAG	Phocaeicola vulgatus	GCF_020091465.1	99.55	refseq	FMT-1	Pretreatment
GTAACGT_CACACCT_CATATGG	Phocaeicola vulgatus	GCF_020091465.1	99.55	refseq	FMT-1	Pretreatment
GGTATTG_CACAAGG_GTGCTTC	Anaerostipes caccae	GCF_036419175.1	99.55	refseq	FMT-1	Pretreatment
TTGAACG_ACACCGG_ACGCAGC	Phocaeicola vulgatus	GCF_020091465.1	99.55	refseq	FMT-1	Pretreatment
TCAGGAT_TTCGAAG_TCAGATG	Anaerostipes caccae	GCF_020181435.1	99.55	refseq	FMT-1	Pretreatment
CTAGCCT_ACCAAGT_AGTAGTC	Citrobacter sp.	GCF_013791465.1	99.54	refseq	FMT-1	Pretreatment
CGCTTCA_GTCGTAA_CAGCAGC	Anaerostipes caccae	GCF_036419175.1	99.54	refseq	FMT-1	Pretreatment
CTAAGAC_TTTGCCA_ATAAGGG	Blautia coccoides	GCF_034355335.1	99.54	refseq	FMT-1	Pretreatment
GACCTGG_CTCTACG_AACTCTT	Anaerostipes caccae	GCF_036419175.1	99.54	refseq	FMT-1	Pretreatment
CGTAGCG_ACTTTCA_TTGCCGT	Phocaeicola vulgatus	GCF_020091465.1	99.54	refseq	FMT-1	Pretreatment
CAAGAAA_TTCGAAG_GCGCAAC	Phocaeicola vulgatus	GCF_020091465.1	99.54	refseq	FMT-1	Pretreatment
CACATTT_TTCTCAA_GCATGAT	Phocaeicola vulgatus	GCF_020091465.1	99.54	refseq	FMT-1	Pretreatment
CTAAGAC_GTTCTCG_TTTGCGC	Phocaeicola vulgatus	GCF_020091465.1	99.54	refseq	FMT-1	Pretreatment
AGCGTCG_AAACGTC_GTATCTT	Phocaeicola vulgatus	GCF_036419465.1	99.54	refseq	FMT-1	Pretreatment
CAGCTAA_TGCTTGC_TCCACAC	Eggerthella lenta	GCF_021378685.1	99.54	refseq	FMT-1	Pretreatment
GTATCTT_GAATGAA_TGGACGC	Adlercreutzia hattorii	GCF_011405655.1	99.54	refseq	FMT-1	Pretreatment
TACACGA_ATAAGAG_AAAGATG	Anaerostipes caccae	GCF_036419175.1	99.54	refseq	FMT-1	Pretreatment
CGGAGCT_ACGTAAA_ATTACTC	Phocaeicola vulgatus	GCF_020091465.1	99.53	refseq	FMT-1	Pretreatment
GCATGCG_GATCGTA_CATTCGC	Anaerostipes caccae	GCF_036419175.1	99.53	refseq	FMT-1	Pretreatment
CACATTT_ATTGGAC_AGCGGTC	Phocaeicola vulgatus	GCF_020091465.1	99.53	refseq	FMT-1	Pretreatment
CACACAA_CGTGTCT_GGATGTT	Phocaeicola vulgatus	GCF_024759565.1	99.53	refseq	FMT-1	Pretreatment
TCTTCGG_TCAGATG_CGAACAT	Thomasclavelia ramosa	GCF_016728785.1	99.53	refseq	FMT-1	Pretreatment
GGCAATT_CTCAATA_CGCTATC	Thomasclavelia ramosa	GCF_016027135.1	99.53	refseq	FMT-1	Pretreatment
GGCTCGA_CGACGTT_GCTGCAG	Anaerostipes caccae	GCF_036419175.1	99.53	refseq	FMT-1	Pretreatment
TTGAACG_TTGACTC_TCTGGAA	Anaerostipes caccae	GCF_036419175.1	99.53	refseq	FMT-1	Pretreatment
ATGTGTG_GGGCACT_AGTAGTC	Phocaeicola vulgatus	GCF_020091465.1	99.52	refseq	FMT-1	Pretreatment
ATTCTAC_GCGCGAT_TACTCAT	Phocaeicola vulgatus	GCF_020091465.1	99.52	refseq	FMT-1	Pretreatment
AGGGTGA_CTCCTAG_ATAAGGG	Eggerthella lenta	GCF_000024265.1	99.52	refseq	FMT-1	Pretreatment
CTAAGAC_GATCGTA_AGGAGGT	Eggerthella lenta	GCF_000024265.1	99.52	refseq	FMT-1	Pretreatment
ATGTGTG_TCACGAA_ATCCGAA	Thomasclavelia ramosa	GCF_016728785.1	99.52	refseq	FMT-1	Pretreatment
TCAGGAT_GATCGTA_CTTGGCT	Eggerthella lenta	GCF_021378605.1	99.52	refseq	FMT-1	Pretreatment
GATCGAT_ACCAAGT_TTTGCGC	Phocaeicola vulgatus	GCF_020091465.1	99.51	refseq	FMT-1	Pretreatment
ACCGTAA_ACGTAAA_TTTGCGC	Phocaeicola vulgatus	GCF_020091465.1	99.51	refseq	FMT-1	Pretreatment
CACACAA_CATATCG_TTAGGCA	Anaerostipes caccae	GCF_036419175.1	99.51	refseq	FMT-1	Pretreatment
GTGGGTC_CAGATCA_GTATCTT	Eggerthella lenta	GCF_022845935.1	99.51	refseq	FMT-1	Pretreatment
CAGCTAA_AATCGGT_CTCACAC	Phocaeicola vulgatus	GCF_020091465.1	99.5	refseq	FMT-1	Pretreatment
GAATAAG_GGAAAGC_AGAATCT	Phocaeicola vulgatus	GCF_020091465.1	99.5	refseq	FMT-1	Pretreatment
AAGGTTC_ATGTGTG_AAATGAG	Anaerostipes caccae	GCF_036419175.1	99.5	refseq	FMT-1	Pretreatment
AAACCTG_TTCGAAG_CTCGAAA	Phocaeicola vulgatus	GCF_000012825.1	99.5	refseq	FMT-1	Pretreatment
TGTGTTT_ATGTGTG_TCTCAGC	Eggerthella lenta	GCF_022845935.1	99.5	refseq	FMT-1	Pretreatment
GGCAATT_AGACATA_CTAAGAC	Phocaeicola vulgatus	GCF_020091465.1	99.5	refseq	FMT-1	Pretreatment
CGAACAT_CGTAGCA_GTGTGCG	Phocaeicola vulgatus	GCF_020091465.1	99.49	refseq	FMT-1	Pretreatment
GAGCAGA_CGCGGTA_CTGAAAC	Phocaeicola vulgatus	GCF_024758205.1	99.49	refseq	FMT-1	Pretreatment
CTTCTCT_GAAACTC_TTGCCGT	Enterocloster bolteae	GCF_002234575.2	99.49	refseq	FMT-1	Pretreatment
AAGGTTC_TCGTCTT_TGAGAGG	Anaerostipes caccae	GCF_036419175.1	99.49	refseq	FMT-1	Pretreatment
GCTCTGT_GGAGCAA_GTGTGCG	Anaerostipes caccae	GCF_036419175.1	99.49	refseq	FMT-1	Pretreatment
CAGAGAG_TACTTGT_CTCGAAA	Phocaeicola vulgatus	GCF_020091465.1	99.49	refseq	FMT-1	Pretreatment
ATCACGA_TGGCTGG_TGATTTC	Phocaeicola vulgatus	GCF_024758205.1	99.49	refseq	FMT-1	Pretreatment
ATCACGA_CGTAGCA_TCTTCGG	Phocaeicola vulgatus	GCF_024758205.1	99.49	refseq	FMT-1	Pretreatment
ACCGTAA_AGCCTAA_ATTTCTG	Eggerthella lenta	GCF_021378625.1	99.49	refseq	FMT-1	Pretreatment
AGTAGTC_ACGCAGA_GCCAAAT	Thomasclavelia ramosa	GCF_020097255.1	99.49	refseq	FMT-1	Pretreatment
CACACAA_CATTCGC_TTTGCGC	Phocaeicola vulgatus	GCF_020091465.1	99.49	refseq	FMT-1	Pretreatment
GTGCAGC_CACCTTA_CATTCGC	Anaerostipes caccae	GCF_036419175.1	99.49	refseq	FMT-1	Pretreatment
TCTCATA_GTCGTAA_GTGCTTC	Phocaeicola vulgatus	GCF_020091465.1	99.49	refseq	FMT-1	Pretreatment
TTAGGCA_ATCATTC_ACACTGA	Phocaeicola vulgatus	GCF_020091465.1	99.49	refseq	FMT-1	Pretreatment
TACACGA_ATGTGTG_AGAAAGG	Phocaeicola vulgatus	GCF_020091465.1	99.49	refseq	FMT-1	Pretreatment
GTGTTAG_CATATCG_ACGATAC	Phocaeicola vulgatus	GCF_020091465.1	99.49	refseq	FMT-1	Pretreatment
TCACGAA_CAAGTTG_ACGGCCA	Phocaeicola vulgatus	GCF_024022975.1	99.49	refseq	FMT-1	Pretreatment
GGAAAGC_ACGCAGA_TGACGGC	Thomasclavelia ramosa	GCF_016728785.1	99.49	refseq	FMT-1	Pretreatment
TCAGGAT_TAAGAGA_ACTGAGT	Phocaeicola vulgatus	GCF_000012825.1	99.49	refseq	FMT-1	Pretreatment
TTAGGCA_TGACTTT_AGAAAGG	Phocaeicola vulgatus	GCF_020091465.1	99.49	refseq	FMT-1	Pretreatment
GATCGAT_GACCAAT_AGGAGGT	Phocaeicola vulgatus	GCF_024022975.1	99.48	refseq	FMT-1	Pretreatment
AACCGCG_ATAAGAG_AGGGCTT	Phocaeicola vulgatus	GCF_024758205.1	99.48	refseq	FMT-1	Pretreatment
TCTCATA_GGTAGTG_GTTGCTT	Eggerthella lenta	GCF_000024265.1	99.48	refseq	FMT-1	Pretreatment
TCAGCTC_CTCCTAG_GGAGCAA	Phocaeicola vulgatus	GCF_024758205.1	99.48	refseq	FMT-1	Pretreatment
TTTATGC_GTAACTG_TAAGCGT	Phocaeicola vulgatus	GCF_008728395.1	99.48	refseq	FMT-1	Pretreatment
TTCGGTC_TTAGGAC_CGATTAT	Phocaeicola vulgatus	GCF_020885855.1	99.48	refseq	FMT-1	Pretreatment
GCTGGGT_GAAACTC_GACCTGG	Phocaeicola vulgatus	GCF_024022975.1	99.47	refseq	FMT-1	Pretreatment
GCTCTGT_GCGCGAT_ACGGCCA	Mediterraneibacter gnavus	GCF_009831375.1	99.47	refseq	FMT-1	Pretreatment
CGTAGCG_GAAACTC_TTTGCGC	Thomasclavelia ramosa	GCF_016027135.1	99.47	refseq	FMT-1	Pretreatment
TTCGGTC_GGAGCAA_CTCGAAA	Phocaeicola vulgatus	GCF_020091465.1	99.47	refseq	FMT-1	Pretreatment
TTGCGTC_CGGAGCT_TACTCAT	Eggerthella lenta	GCF_021378605.1	99.47	refseq	FMT-1	Pretreatment
ACGCCGA_AAGACCT_TGGACGC	Phocaeicola vulgatus	GCF_024758205.1	99.46	refseq	FMT-1	Pretreatment
CACATTT_GTCGTAA_CGAACAT	Phocaeicola vulgatus	GCF_000012825.1	99.46	refseq	FMT-1	Pretreatment
CAGCTAA_AATCGGT_TACTCAT	Phocaeicola vulgatus	GCF_020091465.1	99.46	refseq	FMT-1	Pretreatment
CGTAGCG_GAAACTC_TCCACAC	Phocaeicola vulgatus	GCF_024758205.1	99.46	refseq	FMT-1	Pretreatment
GGCAATT_ACGGGTC_CGCTATC	Phocaeicola vulgatus	GCF_020091465.1	99.46	refseq	FMT-1	Pretreatment
GGTATTG_TTCGAAG_GCGCAAC	Phocaeicola vulgatus	GCF_020091465.1	99.46	refseq	FMT-1	Pretreatment
CACATTT_CATATCG_AATCTTG	Anaerostipes caccae	GCF_036419175.1	99.45	refseq	FMT-1	Pretreatment
CGTGAGC_TCACGAA_ACGCAGC	Phocaeicola vulgatus	GCF_020091465.1	99.45	refseq	FMT-1	Pretreatment
CAGAGAG_ACGTAAA_CGACTTC	Phocaeicola vulgatus	GCF_020091465.1	99.45	refseq	FMT-1	Pretreatment
ACTTTCA_TCAGATG_AAAGATG	Phocaeicola vulgatus	GCF_020091465.1	99.45	refseq	FMT-1	Pretreatment
ATTCTAC_TATCTCA_AGAATCT	Anaerostipes caccae	GCF_036419175.1	99.45	refseq	FMT-1	Pretreatment
GGAAAGC_AACTCAG_CATATGG	Phocaeicola vulgatus	GCF_020091465.1	99.45	refseq	FMT-1	Pretreatment
GCTGCAG_CGTTGGG_GCTGCAG	Anaerostipes caccae	GCF_036419175.1	99.45	refseq	FMT-1	Pretreatment
GCTGCAG_CGTTGGG_GGATGTT	Enterocloster bolteae	GCF_016889665.1	99.45	refseq	FMT-1	Pretreatment
CGCTTCA_TCGTCTT_AGAATCT	Phocaeicola vulgatus	GCF_020091465.1	99.45	refseq	FMT-1	Pretreatment
CCTACAC_CACAAGG_CTGAAAC	Phocaeicola vulgatus	GCF_024758205.1	99.45	refseq	FMT-1	Pretreatment
GACGTTA_ACGTAAA_TGGACGC	Anaerostipes caccae	GCF_036419175.1	99.45	refseq	FMT-1	Pretreatment
CACACAA_TGGCTGG_TTGCCGT	Anaerostipes caccae	GCF_036419175.1	99.45	refseq	FMT-1	Pretreatment
TCAGCTC_CAGGTGC_TGGCGCA	Phocaeicola vulgatus	GCF_024758205.1	99.45	refseq	FMT-1	Pretreatment
TTTATGC_CACCTTA_TTGCCGT	Phocaeicola vulgatus	GCF_020091465.1	99.45	refseq	FMT-1	Pretreatment
GTAACGT_GTGCGGT_GCTGGGT	Anaerostipes caccae	GCF_036419175.1	99.45	refseq	FMT-1	Pretreatment
GTATCTT_GGAGCAA_GACGTTA	Phocaeicola vulgatus	GCF_024758205.1	99.45	refseq	FMT-1	Pretreatment
GTGCAGC_ATTGGAC_TGATTTC	Phocaeicola vulgatus	GCF_020091465.1	99.45	refseq	FMT-1	Pretreatment
GTGTTAG_GTCGTAA_TTGCCGT	Phocaeicola vulgatus	GCF_000012825.1	99.45	refseq	FMT-1	Pretreatment
TCTTCGG_CTCACAC_CATAACT	Anaerostipes caccae	GCF_036419175.1	99.45	refseq	FMT-1	Pretreatment
TTTACTG_CTCTACG_GGTAGTG	Phocaeicola vulgatus	GCF_020091465.1	99.45	refseq	FMT-1	Pretreatment
CGCTTCA_AAGACCT_ACTACCT	Phocaeicola vulgatus	GCF_024758205.1	99.44	refseq	FMT-1	Pretreatment
CGCTTCA_GCGCGAT_TTAGGCA	Eggerthella lenta	GCF_000024265.1	99.44	refseq	FMT-1	Pretreatment
CGTTCTG_CATATCG_TGACGGC	Phocaeicola vulgatus	GCF_024758205.1	99.44	refseq	FMT-1	Pretreatment
GCTGCAG_TTGACTC_CGACTTC	Phocaeicola vulgatus	GCF_036419465.1	99.44	refseq	FMT-1	Pretreatment
ACCAGTA_TTAGGAC_CTAAGAC	Anaerotruncus colihominis	GCF_023008305.1	99.44	refseq	FMT-1	Pretreatment
GTTCATT_GCGATCA_CGATTAT	Phocaeicola vulgatus	GCF_018289355.1	99.44	refseq	FMT-1	Pretreatment
ACTGATG_GCTGCTT_GCTGCAG	Phocaeicola vulgatus	GCF_024758205.1	99.43	refseq	FMT-1	Pretreatment
CGTTCTG_GTATAAG_GGAGCAA	Phocaeicola vulgatus	GCF_020091465.1	99.43	refseq	FMT-1	Pretreatment
AGCTCTC_TTGACTC_ACGGCCA	Phocaeicola vulgatus	GCF_024759565.1	99.43	refseq	FMT-1	Pretreatment
AGAGCTT_CTGCCTA_TCAGATG	Enterocloster bolteae	GCF_002234575.2	99.43	refseq	FMT-1	Pretreatment
CTCTACG_ACGAGGA_ACTGAGT	Anaerotruncus colihominis	GCF_023008305.1	99.43	refseq	FMT-1	Pretreatment
CACATTT_TTCTCAA_GATCAGT	Parabacteroides distasonis	GCF_018288975.1	99.43	refseq	FMT-1	Pretreatment
CGATGGC_CGGAGCT_AGTGGGA	Phocaeicola vulgatus	GCF_020091465.1	99.43	refseq	FMT-1	Pretreatment
CTTAGGA_GTGAAGG_CATAACT	Phocaeicola vulgatus	GCF_024758205.1	99.43	refseq	FMT-1	Pretreatment
CGATGGC_TTGACTC_TACAGTG	Phocaeicola vulgatus	GCF_024758205.1	99.43	refseq	FMT-1	Pretreatment
GCGCCAA_ACACCGG_ACACTGA	Phocaeicola vulgatus	GCF_020091465.1	99.43	refseq	FMT-1	Pretreatment
AGAGCTT_CGGTTAA_TTGCCGT	Phocaeicola vulgatus	GCF_020091465.1	99.43	refseq	FMT-1	Pretreatment
CGATGGC_GACCAAT_TCAACGA	Phocaeicola vulgatus	GCF_020091465.1	99.43	refseq	FMT-1	Pretreatment
CGATGGC_TTGGAAC_AGGGCTT	Phocaeicola vulgatus	GCF_020091465.1	99.43	refseq	FMT-1	Pretreatment
AAACCTG_GTATAAG_TGATTTC	Citrobacter sp.	GCF_013747275.1	99.43	refseq	FMT-1	Pretreatment
AGAGCTT_GAATGAA_GACCTGG	[Clostridium] innocuum	GCF_012317185.1	99.43	refseq	FMT-1	Pretreatment
TTTACTG_GGGCACT_GCGCAAC	Phocaeicola vulgatus	GCF_020091465.1	99.43	refseq	FMT-1	Pretreatment
GGAAAGC_CATTCGC_AGAAAGG	Anaerostipes caccae	GCF_036419175.1	99.43	refseq	FMT-1	Pretreatment
TTTACTG_TCTGAGA_TCGAGGC	Anaerotruncus colihominis	GCF_023008305.1	99.43	refseq	FMT-1	Pretreatment
GGAAAGC_GAAACTC_GAACCTA	Phocaeicola vulgatus	GCF_024022975.1	99.43	refseq	FMT-1	Pretreatment
TACGGGC_GTCGTAA_GTGTGCG	Anaerostipes caccae	GCF_036419175.1	99.43	refseq	FMT-1	Pretreatment
ATTCTAC_GAATGAA_AGAAAGG	Phocaeicola vulgatus	GCF_018289355.1	99.42	refseq	FMT-1	Pretreatment
CGCTTCA_GGCCGAT_CAGTAAC	Citrobacter sp.	GCF_013747275.1	99.42	refseq	FMT-1	Pretreatment
CTAATGG_CGATGTA_CTTGGCT	Blautia coccoides	GCF_034355335.1	99.42	refseq	FMT-1	Pretreatment
GGAAAGC_TACTTGT_GGATGTT	Thomasclavelia ramosa	GCF_016728785.1	99.42	refseq	FMT-1	Pretreatment
CAAGAAA_GGTAGTG_TACAGTG	Phocaeicola vulgatus	GCF_020091465.1	99.41	refseq	FMT-1	Pretreatment
CTAGCCT_CGAATGT_AAACAAC	Phocaeicola vulgatus	GCF_020091465.1	99.41	refseq	FMT-1	Pretreatment
AGCTCTC_ATTGGAC_ATAAGGG	Thomasclavelia ramosa	GCF_016728785.1	99.41	refseq	FMT-1	Pretreatment
ACTGATG_GACGTGC_CATTCGC	Phocaeicola vulgatus	GCF_008728395.1	99.41	refseq	FMT-1	Pretreatment
AACCGCG_AGGTGTA_AGGAGGT	Phocaeicola vulgatus	GCF_020091465.1	99.41	refseq	FMT-1	Pretreatment
GACGTTA_GGAAAGC_TGAGAGG	Anaerostipes caccae	GCF_036419175.1	99.4	refseq	FMT-1	Pretreatment
AAGACCT_TGGCTGG_TGACGGC	Thomasclavelia ramosa	GCF_016027135.1	99.4	refseq	FMT-1	Pretreatment
CTAATGG_CTCACAC_CGATTAT	Phocaeicola vulgatus	GCF_008728395.1	99.4	refseq	FMT-1	Pretreatment
CAGAGAG_GTGCGGT_GGCGACT	Eggerthella lenta	GCF_021378645.1	99.4	refseq	FMT-1	Pretreatment
TCGGGAC_TGGCTGG_TGATTTC	Phocaeicola vulgatus	GCF_024759565.1	99.4	refseq	FMT-1	Pretreatment
GGAAAGC_CACCTTA_AACTCTT	Phocaeicola vulgatus	GCF_020091465.1	99.4	refseq	FMT-1	Pretreatment
CTTAGGA_CGCGGTA_ATAAGGG	Phocaeicola vulgatus	GCF_024758205.1	99.39	refseq	FMT-1	Pretreatment
CAGCTAA_TTGGAAC_GTTGCTT	Phocaeicola vulgatus	GCF_020091465.1	99.39	refseq	FMT-1	Pretreatment
CGTAGCG_GTGCGGT_ATTTCTG	Phocaeicola vulgatus	GCF_024758205.1	99.39	refseq	FMT-1	Pretreatment
CGTGAGC_GTATAAG_ATTACTC	Phocaeicola vulgatus	GCF_008728395.1	99.39	refseq	FMT-1	Pretreatment
ATCTACT_CGTGTCT_TTCGGAC	Anaerostipes caccae	GCF_036419175.1	99.39	refseq	FMT-1	Pretreatment
CGAGAAG_GTAACTG_TGGGAAG	Anaerostipes caccae	GCF_036419175.1	99.39	refseq	FMT-1	Pretreatment
GACTACA_CATATCG_TGATTTC	Blautia coccoides	GCF_034355335.1	99.39	refseq	FMT-1	Pretreatment
CTGCCTA_CTGCCTA_CTGCGGA	Phocaeicola vulgatus	GCF_024758205.1	99.39	refseq	FMT-1	Pretreatment
GCAGCCA_TTGACTC_TAGACCA	Anaerostipes caccae	GCF_036419175.1	99.39	refseq	FMT-1	Pretreatment
CTAGCCT_AGACATA_AAACAAC	Phocaeicola vulgatus	GCF_024758205.1	99.39	refseq	FMT-1	Pretreatment
GAAATGA_CGATGTA_ACCGTAA	Phocaeicola vulgatus	GCF_020091465.1	99.39	refseq	FMT-1	Pretreatment
AAGGTTC_AGCGTCG_CATAACT	Phocaeicola vulgatus	GCF_024022975.1	99.39	refseq	FMT-1	Pretreatment
CAGAGAG_ACTTTCA_AGTAGTC	Anaerostipes caccae	GCF_036419175.1	99.39	refseq	FMT-1	Pretreatment
GTAACGT_GAGTCCG_AGAATCT	Phocaeicola vulgatus	GCF_000012825.1	99.39	refseq	FMT-1	Pretreatment
TCAGGAT_TGTACCT_ATAAGGG	Phocaeicola vulgatus	GCF_036419465.1	99.39	refseq	FMT-1	Pretreatment
GTAACGT_GCATACA_TCCACAC	Phocaeicola vulgatus	GCF_020885715.1	99.39	refseq	FMT-1	Pretreatment
CAGCAGC_GGGTTGC_ATTTCTG	Parabacteroides distasonis	GCF_018288975.1	99.38	refseq	FMT-1	Pretreatment
ATTCTAC_GAAACTC_GGATGTT	Phocaeicola vulgatus	GCF_024758205.1	99.38	refseq	FMT-1	Pretreatment
CAGCAGC_ACGGGTC_ACTACCT	Anaerostipes caccae	GCF_020181435.1	99.38	refseq	FMT-1	Pretreatment
AGCGTCG_CGGTTAA_ACTACCT	Blautia coccoides	GCF_034355335.1	99.38	refseq	FMT-1	Pretreatment
TCAGGAT_ACGAGGA_TCGTAGA	Anaerotruncus colihominis	GCF_023008305.1	99.38	refseq	FMT-1	Pretreatment
TCTCATA_GTCGTAA_GCACTCT	Phocaeicola vulgatus	GCF_036419465.1	99.38	refseq	FMT-1	Pretreatment
ACGCCGA_AGCTATT_GGGTTGC	Thomasclavelia ramosa	GCF_014131695.1	99.37	refseq	FMT-1	Pretreatment
CTGCCTA_GAATGAA_CGCGTTT	Phocaeicola vulgatus	GCF_020091465.1	99.37	refseq	FMT-1	Pretreatment
GCAGCCA_GTTCTCG_TAAGCGT	Phocaeicola vulgatus	GCF_020091465.1	99.37	refseq	FMT-1	Pretreatment
ACTGATG_GACGTGC_GGAACTT	[Clostridium] innocuum	GCF_012317185.1	99.37	refseq	FMT-1	Pretreatment
GCTGGGT_GCCTCTA_AAGGTTC	Anaerostipes caccae	GCF_036419175.1	99.37	refseq	FMT-1	Pretreatment
ACTTTCA_CACACCT_TGGGAAG	Phocaeicola vulgatus	GCF_024022975.1	99.37	refseq	FMT-1	Pretreatment
TCGGGAC_CTCCTAG_CATAACT	Phocaeicola vulgatus	GCF_024759565.1	99.37	refseq	FMT-1	Pretreatment
TACTTAC_CTCAATA_CATAACT	Phocaeicola vulgatus	GCF_020091465.1	99.37	refseq	FMT-1	Pretreatment
ACCGTAA_GGGCACT_ATTCTAC	Phocaeicola vulgatus	GCF_024758205.1	99.36	refseq	FMT-1	Pretreatment
CTTCTCT_AGTTACG_TGAGAGG	Anaerostipes caccae	GCF_036419175.1	99.36	refseq	FMT-1	Pretreatment
ACGATAC_AACTCAG_GACCTGG	Phocaeicola vulgatus	GCF_020091465.1	99.36	refseq	FMT-1	Pretreatment
GCTGCAG_ACCAAGT_TACTCAT	Anaerostipes caccae	GCF_036419175.1	99.36	refseq	FMT-1	Pretreatment
AAACCTG_TGAGCCG_AGTAGTC	Anaerotruncus colihominis	GCF_023008305.1	99.36	refseq	FMT-1	Pretreatment
AGCGTCG_GGTAGTG_TTTGCGC	Phocaeicola vulgatus	GCF_020091465.1	99.36	refseq	FMT-1	Pretreatment
AAGACCT_AGCTATT_GCCAAAT	Eggerthella lenta	GCF_021378705.1	99.36	refseq	FMT-1	Pretreatment
CGAGAAG_CATTCGC_ATTCTAC	Phocaeicola vulgatus	GCF_024758205.1	99.36	refseq	FMT-1	Pretreatment
CACACAA_GTATAAG_ACGGCCA	Phocaeicola vulgatus	GCF_024758205.1	99.36	refseq	FMT-1	Pretreatment
GCATGCG_TTTGCCA_ATTTCTG	Anaerostipes caccae	GCF_036419175.1	99.36	refseq	FMT-1	Pretreatment
CAGAGAG_CTCAATA_ATTACTC	Blautia coccoides	GCF_034355335.1	99.36	refseq	FMT-1	Pretreatment
GATCGAT_TTGGAAC_TCTCAGC	Phocaeicola vulgatus	GCF_024758205.1	99.36	refseq	FMT-1	Pretreatment
GCTCTGT_CTGCCTA_TCAGATG	Phocaeicola vulgatus	GCF_020091465.1	99.36	refseq	FMT-1	Pretreatment
GACGTTA_GTGCGGT_TCTTCGG	Phocaeicola vulgatus	GCF_024758205.1	99.36	refseq	FMT-1	Pretreatment
CTTAGGA_CGTAGCA_AAACAAC	Phocaeicola vulgatus	GCF_020091465.1	99.36	refseq	FMT-1	Pretreatment
TGCCAAA_AACTCAG_CGACTTC	Eggerthella lenta	GCF_021378625.1	99.36	refseq	FMT-1	Pretreatment
TTCGGTC_TCGTCTT_GTGCTTC	Phocaeicola vulgatus	GCF_020091465.1	99.36	refseq	FMT-1	Pretreatment
TAGCCGG_GACTGTC_CTGAAAC	Thomasclavelia ramosa	GCF_020097255.1	99.36	refseq	FMT-1	Pretreatment
GGACGTC_GTGCGGT_CTGAAAC	Phocaeicola vulgatus	GCF_024758205.1	99.36	refseq	FMT-1	Pretreatment
GTGGGTC_GCCTCTA_GATCAGT	Phocaeicola vulgatus	GCF_024758205.1	99.36	refseq	FMT-1	Pretreatment
TGGCGCA_TTCGAAG_GGAGCAA	Phocaeicola vulgatus	GCF_020091465.1	99.36	refseq	FMT-1	Pretreatment
TGCTGCT_GCCTCTA_AGGGCTT	Phocaeicola vulgatus	GCF_024758205.1	99.36	refseq	FMT-1	Pretreatment
GGGCACT_GTAACTG_AATCTTG	Phocaeicola vulgatus	GCF_020091465.1	99.36	refseq	FMT-1	Pretreatment
TCTTCGG_TTCTCAA_ACACTGA	Phocaeicola vulgatus	GCF_020091465.1	99.36	refseq	FMT-1	Pretreatment
GGACGTC_GACTGTC_GCGGGTT	Thomasclavelia ramosa	GCF_014131695.1	99.36	refseq	FMT-1	Pretreatment
TACTTAC_TCAGATG_TGGGAAG	Phocaeicola vulgatus	GCF_020091465.1	99.36	refseq	FMT-1	Pretreatment
TCACGAA_GGCCGAT_CTCGAAA	Phocaeicola vulgatus	GCF_020091465.1	99.36	refseq	FMT-1	Pretreatment
ATCACGA_AGACATA_GATCAGT	Phocaeicola vulgatus	GCF_024758205.1	99.35	refseq	FMT-1	Pretreatment
GCAGCCA_TTGGAAC_TTTGCGC	Anaerostipes caccae	GCF_036419175.1	99.35	refseq	FMT-1	Pretreatment
CCTACAC_CACACCT_ACGATAC	Phocaeicola vulgatus	GCF_024758205.1	99.35	refseq	FMT-1	Pretreatment
AGGCCAC_ACGAGGA_TAAGCGT	Anaerostipes caccae	GCF_036419175.1	99.35	refseq	FMT-1	Pretreatment
TTTATGC_GTTCTCG_AGTGGGA	Phocaeicola vulgatus	GCF_024759565.1	99.35	refseq	FMT-1	Pretreatment
TACTTAC_TGACTTT_TTTGCGC	Phocaeicola vulgatus	GCF_020091465.1	99.35	refseq	FMT-1	Pretreatment
TCAGGAT_GGAGCAA_GCCAAAT	Anaerostipes caccae	GCF_036419175.1	99.35	refseq	FMT-1	Pretreatment
GTAACGT_ACAACAC_CTGCGGA	Thomasclavelia ramosa	GCF_020097255.1	99.35	refseq	FMT-1	Pretreatment
GTGTTAG_CGTGTCT_ACACTGA	Phocaeicola vulgatus	GCF_024758205.1	99.35	refseq	FMT-1	Pretreatment
AAGGTTC_CGATGTA_CACACTC	Thomasclavelia ramosa	GCF_016728785.1	99.34	refseq	FMT-1	Pretreatment
CGAGAAG_AGCCTAA_AATCTTG	Eggerthella lenta	GCF_021378705.1	99.34	refseq	FMT-1	Pretreatment
TGCCAAA_TTAGGAC_GGTAGTG	Thomasclavelia ramosa	GCF_014131695.1	99.34	refseq	FMT-1	Pretreatment
TCGGGAC_TTCTCAA_TTAGGCA	Phocaeicola vulgatus	GCF_020885855.1	99.34	refseq	FMT-1	Pretreatment
TGTGTTT_CATATCG_AGGAGGT	Phocaeicola vulgatus	GCF_020091465.1	99.34	refseq	FMT-1	Pretreatment
GCTGCAG_GACTGTC_ACGATAC	Phocaeicola vulgatus	GCF_024758205.1	99.33	refseq	FMT-1	Pretreatment
GCTCTGT_ATAAGAG_GTGTGCG	Phocaeicola vulgatus	GCF_024758205.1	99.33	refseq	FMT-1	Pretreatment
CAAGAAA_CTCAATA_ATCCGAA	Phocaeicola vulgatus	GCF_020091465.1	99.33	refseq	FMT-1	Pretreatment
CGGAGCT_TCACGAA_AGTGGGA	Thomasclavelia ramosa	GCF_014131695.1	99.33	refseq	FMT-1	Pretreatment
CAGCTAA_ACTGAAC_AAATGAG	Phocaeicola vulgatus	GCF_024758205.1	99.33	refseq	FMT-1	Pretreatment
CGTGAGC_GATCGTA_AGAAAGG	Phocaeicola vulgatus	GCF_020091465.1	99.33	refseq	FMT-1	Pretreatment
CTCTACG_CAGATCA_CTGCGGA	Anaerostipes caccae	GCF_036419175.1	99.33	refseq	FMT-1	Pretreatment
CGCTTCA_TTCTCAA_ACACTGA	Thomasclavelia ramosa	GCF_016027135.1	99.33	refseq	FMT-1	Pretreatment
CTAAGAC_CGGTTAA_GCTGGGT	Anaerostipes caccae	GCF_020181435.1	99.33	refseq	FMT-1	Pretreatment
ATCACGA_CTCTACG_TTCGGAC	Anaerostipes caccae	GCF_036419175.1	99.33	refseq	FMT-1	Pretreatment
ACTGATG_TGAGCCG_AAACAAC	Phocaeicola vulgatus	GCF_020091465.1	99.33	refseq	FMT-1	Pretreatment
CACACAA_GTGAAGG_GTTGCTT	Phocaeicola vulgatus	GCF_024759565.1	99.33	refseq	FMT-1	Pretreatment
CGATGGC_CGAATGT_AGTAGTC	Eggerthella lenta	GCF_021378705.1	99.33	refseq	FMT-1	Pretreatment
ATCTACT_CATTCGC_GATCTAG	Streptococcus iniae	GCF_001885145.1	99.33	refseq	FMT-1	Pretreatment
CGAACAT_ACGGGTC_AGTAGTC	Phocaeicola vulgatus	GCF_020091465.1	99.33	refseq	FMT-1	Pretreatment
GCGCCAA_GATCGTA_CGATTAT	Phocaeicola vulgatus	GCF_036419465.1	99.33	refseq	FMT-1	Pretreatment
CACACAA_CTCCTAG_CTCACAC	Phocaeicola vulgatus	GCF_024758205.1	99.33	refseq	FMT-1	Pretreatment
ATGTGTG_CTCACAC_ATTTCTG	Phocaeicola vulgatus	GCF_020091465.1	99.33	refseq	FMT-1	Pretreatment
ATTCTAC_CGACGTT_TTGGCAA	Phocaeicola vulgatus	GCF_024758205.1	99.33	refseq	FMT-1	Pretreatment
TGGCGCA_GATCGTA_CACACTC	Phocaeicola vulgatus	GCF_020885715.1	99.33	refseq	FMT-1	Pretreatment
TAGCCGG_TGCTTGC_GTGCTTC	Phocaeicola vulgatus	GCF_020091465.1	99.33	refseq	FMT-1	Pretreatment
TCACGAA_AACTCAG_CGATTAT	Thomasclavelia ramosa	GCF_014131695.1	99.33	refseq	FMT-1	Pretreatment
TTTATGC_GGTAGTG_GGAGCAA	Phocaeicola vulgatus	GCF_020091465.1	99.33	refseq	FMT-1	Pretreatment
TACACGA_ACGCAGA_CTAAGAC	Phocaeicola vulgatus	GCF_024758205.1	99.33	refseq	FMT-1	Pretreatment
TTTATGC_CGGAGCT_TCCACAC	Phocaeicola vulgatus	GCF_020091465.1	99.33	refseq	FMT-1	Pretreatment
GTAACGT_CTTCTCT_CAGCAGC	Phocaeicola vulgatus	GCF_020091465.1	99.33	refseq	FMT-1	Pretreatment
GGTATTG_CGGTTAA_GACGTTA	Phocaeicola vulgatus	GCF_020091465.1	99.33	refseq	FMT-1	Pretreatment
GTGTTAG_GAAACTC_ATAAGGG	Phocaeicola vulgatus	GCF_020091465.1	99.33	refseq	FMT-1	Pretreatment
TCACGAA_ACACCGG_ATCCGAA	Phocaeicola vulgatus	GCF_020091465.1	99.33	refseq	FMT-1	Pretreatment
TTGAACG_AATCGGT_AAATGAG	Phocaeicola vulgatus	GCF_024758205.1	99.33	refseq	FMT-1	Pretreatment
TCTTCGG_GTAACTG_AGCTCCT	Phocaeicola vulgatus	GCF_020091465.1	99.33	refseq	FMT-1	Pretreatment
GTGGGTC_AATCGGT_GTATCTT	Phocaeicola vulgatus	GCF_020091465.1	99.33	refseq	FMT-1	Pretreatment
GTAACGT_TTCTCAA_TTCGGAC	Thomasclavelia ramosa	GCF_014131695.1	99.33	refseq	FMT-1	Pretreatment
TACGGGC_CACTCCA_GATCAGT	Phocaeicola vulgatus	GCF_020091465.1	99.33	refseq	FMT-1	Pretreatment
TCGGGAC_TAAGAGA_CGATTAT	Phocaeicola vulgatus	GCF_024758205.1	99.33	refseq	FMT-1	Pretreatment
TTTATGC_CTGCCTA_CAGTAAC	Phocaeicola vulgatus	GCF_020091465.1	99.33	refseq	FMT-1	Pretreatment
TTGAACG_GACCAAT_CTCCTAG	Thomasclavelia ramosa	GCF_016728785.1	99.33	refseq	FMT-1	Pretreatment
GTTCATT_ACACCGG_ATTCTAC	Phocaeicola vulgatus	GCF_036419465.1	99.32	refseq	FMT-1	Pretreatment
GACTACA_GGTAGTG_AATCTTG	Thomasclavelia ramosa	GCF_014131695.1	99.31	refseq	FMT-1	Pretreatment
AGCTCTC_GTATAAG_GAACCTA	Thomasclavelia ramosa	GCF_016728785.1	99.31	refseq	FMT-1	Pretreatment
CTCTACG_AGACATA_CGCGTTT	Thomasclavelia ramosa	GCF_014131695.1	99.31	refseq	FMT-1	Pretreatment
AAGACCT_ACACCGG_GTATCTT	Phocaeicola vulgatus	GCF_020091465.1	99.31	refseq	FMT-1	Pretreatment
CATTATC_CACAAGG_TTCGGAC	Phocaeicola vulgatus	GCF_020885855.1	99.31	refseq	FMT-1	Pretreatment
CATTATC_CGCGGTA_GTGTGCG	Phocaeicola vulgatus	GCF_020091465.1	99.31	refseq	FMT-1	Pretreatment
GCAAACT_ACTTTCA_GCTGCAG	Phocaeicola vulgatus	GCF_020091465.1	99.31	refseq	FMT-1	Pretreatment
GAAATGA_AGCGTCG_TTAGGCA	Phocaeicola vulgatus	GCF_024758205.1	99.31	refseq	FMT-1	Pretreatment
CTTAGGA_AGCCTAA_ATTTCTG	Thomasclavelia ramosa	GCF_016728785.1	99.31	refseq	FMT-1	Pretreatment
CGTGAGC_CGGTTAA_ACTGAGT	Thomasclavelia ramosa	GCF_014131695.1	99.31	refseq	FMT-1	Pretreatment
CACACAA_GCACATA_TACTCAT	Thomasclavelia ramosa	GCF_014131695.1	99.31	refseq	FMT-1	Pretreatment
ATCTACT_GATCGTA_CTCACAC	Thomasclavelia ramosa	GCF_016027135.1	99.31	refseq	FMT-1	Pretreatment
GAAATGA_ACAACAC_TGATTTC	[Clostridium] innocuum	GCF_023008265.1	99.31	refseq	FMT-1	Pretreatment
CTTAGGA_ACTTTCA_TCCACAC	Thomasclavelia ramosa	GCF_016027135.1	99.31	refseq	FMT-1	Pretreatment
CTTCTCT_GTTCATT_CATATGG	Thomasclavelia ramosa	GCF_016728785.1	99.31	refseq	FMT-1	Pretreatment
TTGCGTC_ACGCAGA_TTGCCGT	Phocaeicola vulgatus	GCF_020091465.1	99.31	refseq	FMT-1	Pretreatment
GTTCATT_AATCGGT_GACGTTA	Phocaeicola vulgatus	GCF_020091465.1	99.31	refseq	FMT-1	Pretreatment
TTTACTG_ATAAGAG_CTCACAC	Thomasclavelia ramosa	GCF_014131695.1	99.31	refseq	FMT-1	Pretreatment
GGGCACT_GAATGAA_GCGGGTT	Thomasclavelia ramosa	GCF_016728785.1	99.31	refseq	FMT-1	Pretreatment
TGTGTTT_ACCAAGT_TGATTTC	Thomasclavelia ramosa	GCF_016728785.1	99.31	refseq	FMT-1	Pretreatment
TCACGAA_ACGGGTC_TGGGAAG	Phocaeicola vulgatus	GCF_024758205.1	99.31	refseq	FMT-1	Pretreatment
GGAAAGC_GTTCTCG_GCACTCT	Phocaeicola vulgatus	GCF_000012825.1	99.31	refseq	FMT-1	Pretreatment
TACACGA_CTGCCTA_CTTGGCT	Phocaeicola vulgatus	GCF_020091465.1	99.31	refseq	FMT-1	Pretreatment
TCAGGAT_ATGTGTG_CTGCGGA	Thomasclavelia ramosa	GCF_014131695.1	99.31	refseq	FMT-1	Pretreatment
TTTACTG_TTCGAAG_TTAGGCA	Eggerthella lenta	GCF_021378705.1	99.31	refseq	FMT-1	Pretreatment
TATCTCA_AAACGTC_GTATCTT	Eggerthella lenta	GCF_022845935.1	99.31	refseq	FMT-1	Pretreatment
AGCTCTC_AACCATG_TGAGAGG	Thomasclavelia ramosa	GCF_016027135.1	99.3	refseq	FMT-1	Pretreatment
ACGATAC_CGTAGCA_CGATTAT	Thomasclavelia ramosa	GCF_014131695.1	99.3	refseq	FMT-1	Pretreatment
AACCGCG_TCACGAA_ACCGTAA	Mediterraneibacter gnavus	GCF_026278305.1	99.3	refseq	FMT-1	Pretreatment
CGAACAT_TGGCTGG_CACAAAC	Mediterraneibacter gnavus	GCF_020181455.1	99.3	refseq	FMT-1	Pretreatment
AGCTCTC_CTTCTCT_CACACTC	Thomasclavelia ramosa	GCF_020097255.1	99.3	refseq	FMT-1	Pretreatment
CGTTCTG_GTGCGGT_TGAGAGG	Phocaeicola vulgatus	GCF_020091465.1	99.3	refseq	FMT-1	Pretreatment
CGGAGCT_GAGTCCG_ACCGTAA	Thomasclavelia ramosa	GCF_014131695.1	99.3	refseq	FMT-1	Pretreatment
AGGCCAC_AGACATA_TTTGCGC	Escherichia coli	GCF_036496705.1	99.3	refseq	FMT-1	Pretreatment
CTAGCCT_GTATAAG_TGGACGC	Anaerostipes caccae	GCF_036419175.1	99.3	refseq	FMT-1	Pretreatment
TTCGGTC_TGGCTGG_TTCGGAC	Thomasclavelia ramosa	GCF_016027135.1	99.3	refseq	FMT-1	Pretreatment
TACTTAC_CACAAGG_AATCTTG	Thomasclavelia ramosa	GCF_016728785.1	99.3	refseq	FMT-1	Pretreatment
TCAGCTC_GTATAAG_GAACCTA	Thomasclavelia ramosa	GCF_014131695.1	99.3	refseq	FMT-1	Pretreatment
TTTACTG_GGGCACT_AGGAGGT	Thomasclavelia ramosa	GCF_016027135.1	99.3	refseq	FMT-1	Pretreatment
TTCGGTC_ACGTAAA_GGATGTT	Thomasclavelia ramosa	GCF_016027135.1	99.3	refseq	FMT-1	Pretreatment
TTGAACG_CATTCGC_CACACTC	Thomasclavelia ramosa	GCF_016728785.1	99.3	refseq	FMT-1	Pretreatment
GGAAAGC_AGTTACG_GGATGTT	Enterocloster bolteae	GCF_023008325.1	99.3	refseq	FMT-1	Pretreatment
GCTGGGT_CGAATGT_GAACCTA	Anaerostipes caccae	GCF_036419175.1	99.29	refseq	FMT-1	Pretreatment
CTCTACG_TCACGAA_GCTGCAG	Phocaeicola vulgatus	GCF_020091465.1	99.29	refseq	FMT-1	Pretreatment
AAACCTG_TGAGCCG_GCGCAAC	Phocaeicola vulgatus	GCF_020091465.1	99.29	refseq	FMT-1	Pretreatment
GCGCCAA_ACCAAGT_ACGATAC	Thomasclavelia ramosa	GCF_014131695.1	99.29	refseq	FMT-1	Pretreatment
CTTAGGA_TCAGATG_TACAGTG	Phocaeicola vulgatus	GCF_024758205.1	99.29	refseq	FMT-1	Pretreatment
CGGAGCT_TCGTCTT_TCTGGAA	Thomasclavelia ramosa	GCF_014131695.1	99.29	refseq	FMT-1	Pretreatment
CGAGAAG_GTATAAG_CGAACAT	Thomasclavelia ramosa	GCF_016728785.1	99.29	refseq	FMT-1	Pretreatment
CATTATC_ACGGGTC_ACCGTAA	Phocaeicola vulgatus	GCF_018289355.1	99.29	refseq	FMT-1	Pretreatment
CGTAGCG_ATTGGAC_CATAACT	Thomasclavelia ramosa	GCF_016728785.1	99.29	refseq	FMT-1	Pretreatment
GACGTTA_GTTCATT_TCGAGGC	Blautia coccoides	GCF_034355335.1	99.29	refseq	FMT-1	Pretreatment
CGGAGCT_TGAGCCG_GCATGAT	Phocaeicola vulgatus	GCF_018289355.1	99.29	refseq	FMT-1	Pretreatment
CAAGAAA_CTCACAC_CAGTAAC	Thomasclavelia ramosa	GCF_014131695.1	99.29	refseq	FMT-1	Pretreatment
ACGCCGA_GTATAAG_ACGATAC	Anaerostipes caccae	GCF_036419175.1	99.29	refseq	FMT-1	Pretreatment
AACCGCG_ACAACAC_AGGGCTT	Thomasclavelia ramosa	GCF_016027135.1	99.29	refseq	FMT-1	Pretreatment
CACACAA_TCAGATG_CTCGAAA	Phocaeicola vulgatus	GCF_024758205.1	99.29	refseq	FMT-1	Pretreatment
CTCGGAG_TAAGAGA_AGCTCCT	Enterocloster bolteae	GCF_023008325.1	99.29	refseq	FMT-1	Pretreatment
GACTACA_ACGCAGA_CATAACT	Phocaeicola vulgatus	GCF_020091465.1	99.29	refseq	FMT-1	Pretreatment
ATTCTAC_ACGTAAA_TAAGCGT	Phocaeicola vulgatus	GCF_020091465.1	99.29	refseq	FMT-1	Pretreatment
CTGCCTA_TTGACTC_AATCTTG	Thomasclavelia ramosa	GCF_014131695.1	99.29	refseq	FMT-1	Pretreatment
CCTACAC_CACTCCA_CGACTTC	Phocaeicola vulgatus	GCF_024758205.1	99.29	refseq	FMT-1	Pretreatment
CTAATGG_ATTGGAC_TAGACCA	Thomasclavelia ramosa	GCF_016728785.1	99.29	refseq	FMT-1	Pretreatment
CAGCTAA_CGAATGT_GGTAGTG	Phocaeicola vulgatus	GCF_036419465.1	99.29	refseq	FMT-1	Pretreatment
AGCGTCG_GCATACA_GTGTGCG	Phocaeicola vulgatus	GCF_020091465.1	99.29	refseq	FMT-1	Pretreatment
CTCTACG_CGACGTT_ATTCTAC	Citrobacter braakii	GCF_029715665.1	99.29	refseq	FMT-1	Pretreatment
GCAAACT_GACCAAT_CAGCAGC	Phocaeicola vulgatus	GCF_024758205.1	99.29	refseq	FMT-1	Pretreatment
CAGTCCT_CACACCT_GGTAGTG	Phocaeicola vulgatus	GCF_024758205.1	99.29	refseq	FMT-1	Pretreatment
CTAATGG_CGTAGCA_TCGAGGC	Phocaeicola vulgatus	GCF_024022975.1	99.29	refseq	FMT-1	Pretreatment
GAAATGA_GTTCTCG_TTGCCGT	Thomasclavelia ramosa	GCF_016027135.1	99.29	refseq	FMT-1	Pretreatment
GCGCCAA_CACACCT_CTCCTAG	Phocaeicola vulgatus	GCF_020091465.1	99.29	refseq	FMT-1	Pretreatment
GAGCAGA_GCTGCTT_AGGAGGT	Phocaeicola vulgatus	GCF_018289355.1	99.29	refseq	FMT-1	Pretreatment
TCTCATA_TCAGATG_CTCCTAG	Thomasclavelia ramosa	GCF_016728785.1	99.29	refseq	FMT-1	Pretreatment
TCGTAGA_GTGCGGT_ACGGCCA	Thomasclavelia ramosa	GCF_016728785.1	99.29	refseq	FMT-1	Pretreatment
GTTCATT_CTCAATA_TCGTAGA	Thomasclavelia ramosa	GCF_016027135.1	99.29	refseq	FMT-1	Pretreatment
GTAACGT_GATCGTA_CATATGG	Thomasclavelia ramosa	GCF_014131695.1	99.29	refseq	FMT-1	Pretreatment
TTGCGTC_GTATAAG_CGATTAT	Anaerostipes caccae	GCF_036419175.1	99.29	refseq	FMT-1	Pretreatment
GGTATTG_TTTGCCA_AACTCTT	Phocaeicola vulgatus	GCF_020091465.1	99.29	refseq	FMT-1	Pretreatment
TGCCAAA_CGCGGTA_TGGGAAG	Phocaeicola vulgatus	GCF_020091465.1	99.29	refseq	FMT-1	Pretreatment
TTCGGTC_GCGCGAT_GACGTTA	Thomasclavelia ramosa	GCF_016027135.1	99.29	refseq	FMT-1	Pretreatment
TGTGTTT_GCTGCTT_AGCTCCT	Phocaeicola vulgatus	GCF_024758205.1	99.29	refseq	FMT-1	Pretreatment
TTGAACG_GAGTCCG_ACGGCCA	Thomasclavelia ramosa	GCF_014131695.1	99.29	refseq	FMT-1	Pretreatment
TTAGGCA_ATGTGTG_GCTGGGT	Phocaeicola vulgatus	GCF_020091465.1	99.29	refseq	FMT-1	Pretreatment
GTTCATT_GAGTCCG_TGACGGC	Thomasclavelia ramosa	GCF_020097255.1	99.29	refseq	FMT-1	Pretreatment
TCGGGAC_TTGACTC_TTGGCAA	Thomasclavelia ramosa	GCF_016027135.1	99.29	refseq	FMT-1	Pretreatment
GTAACGT_AACTCAG_CGTTAGA	Thomasclavelia ramosa	GCF_014131695.1	99.29	refseq	FMT-1	Pretreatment
GTTCATT_CATATCG_TCCACAC	Thomasclavelia ramosa	GCF_014131695.1	99.29	refseq	FMT-1	Pretreatment
TTGCGTC_TCTGAGA_CTCACAC	Thomasclavelia ramosa	GCF_016728785.1	99.29	refseq	FMT-1	Pretreatment
TGCCAAA_CTTCTCT_CACAAAC	Phocaeicola vulgatus	GCF_024758205.1	99.29	refseq	FMT-1	Pretreatment
TTGCGTC_CGGTTAA_TCGTAGA	Phocaeicola vulgatus	GCF_020091465.1	99.29	refseq	FMT-1	Pretreatment
TACACGA_CTCCTAG_AAGGTTC	Phocaeicola vulgatus	GCF_024758205.1	99.29	refseq	FMT-1	Pretreatment
TCGTAGA_GCCTCTA_TGACGGC	Thomasclavelia ramosa	GCF_016027135.1	99.29	refseq	FMT-1	Pretreatment
TCAGGAT_GACGTGC_TAAGCGT	Anaerostipes caccae	GCF_036419175.1	99.29	refseq	FMT-1	Pretreatment
GCTGGGT_TAGGCAT_AGAAAGG	Thomasclavelia ramosa	GCF_014131695.1	99.28	refseq	FMT-1	Pretreatment
CTTAGGA_ACTGAAC_TTTGCGC	Thomasclavelia ramosa	GCF_014131695.1	99.28	refseq	FMT-1	Pretreatment
ATGTGTG_TCAGATG_ACACTGA	Thomasclavelia ramosa	GCF_016728785.1	99.28	refseq	FMT-1	Pretreatment
CAAGAAA_CAAGTTG_AGGGCTT	Thomasclavelia ramosa	GCF_016728785.1	99.28	refseq	FMT-1	Pretreatment
GGCAATT_GCATACA_GGTAGTG	Thomasclavelia ramosa	GCF_016027135.1	99.28	refseq	FMT-1	Pretreatment
TACTTAC_GTGAAGG_AGGGCTT	Thomasclavelia ramosa	GCF_016728785.1	99.28	refseq	FMT-1	Pretreatment
AGGCCAC_GGGCACT_GTATCTT	Phocaeicola vulgatus	GCF_020091465.1	99.27	refseq	FMT-1	Pretreatment
AGGGTGA_AGACATA_ATTACTC	Eggerthella lenta	GCF_021378725.1	99.27	refseq	FMT-1	Pretreatment
TCGGGAC_TATCTCA_ACACTGA	Phocaeicola vulgatus	GCF_020091465.1	99.27	refseq	FMT-1	Pretreatment
GACGTTA_TCTATTG_CAGCAGC	Thomasclavelia ramosa	GCF_016027135.1	99.26	refseq	FMT-1	Pretreatment
ACTGATG_TATCTCA_TAAGCGT	Phocaeicola vulgatus	GCF_024758205.1	99.26	refseq	FMT-1	Pretreatment
CGCTTCA_GGCCGAT_ACGGCCA	Thomasclavelia ramosa	GCF_014131695.1	99.26	refseq	FMT-1	Pretreatment
AACCGCG_TAGGCAT_TCGTAGA	Thomasclavelia ramosa	GCF_014131695.1	99.26	refseq	FMT-1	Pretreatment
AGAGCTT_TTAGGAC_CGATTAT	Anaerostipes caccae	GCF_036419175.1	99.26	refseq	FMT-1	Pretreatment
CGAACAT_ACTTTCA_ATCCGAA	Thomasclavelia ramosa	GCF_014131695.1	99.26	refseq	FMT-1	Pretreatment
CGTTCTG_GTGAAGG_AACTCTT	Thomasclavelia ramosa	GCF_016027135.1	99.26	refseq	FMT-1	Pretreatment
CACACAA_AGGTGTA_AGTAGTC	Thomasclavelia ramosa	GCF_014131695.1	99.26	refseq	FMT-1	Pretreatment
CGTTCTG_TACTTGT_CATATGG	Phocaeicola vulgatus	GCF_020091465.1	99.26	refseq	FMT-1	Pretreatment
ACGATAC_TTGGAAC_TTAGGCA	Phocaeicola vulgatus	GCF_020091465.1	99.26	refseq	FMT-1	Pretreatment
GCAGCCA_GGGCACT_CTAAGAC	Phocaeicola vulgatus	GCF_020091465.1	99.26	refseq	FMT-1	Pretreatment
CGCTTCA_TCTGAGA_GCGCAAC	Thomasclavelia ramosa	GCF_016728785.1	99.26	refseq	FMT-1	Pretreatment
CCTACAC_TATCTCA_TCGAGGC	Thomasclavelia ramosa	GCF_014131695.1	99.26	refseq	FMT-1	Pretreatment
GCTGGGT_CAGATCA_TCGTAGA	Anaerostipes caccae	GCF_036419175.1	99.26	refseq	FMT-1	Pretreatment
AAGGTTC_CTCAATA_ACCGTAA	Thomasclavelia ramosa	GCF_016027135.1	99.26	refseq	FMT-1	Pretreatment
AAACCTG_GGCCGAT_CGTAGCG	Thomasclavelia ramosa	GCF_014131695.1	99.26	refseq	FMT-1	Pretreatment
GACGTTA_AAATCCA_CGCTATC	Thomasclavelia ramosa	GCF_014131695.1	99.26	refseq	FMT-1	Pretreatment
GAAATGA_ATTGGAC_TACTCAT	Thomasclavelia ramosa	GCF_016027135.1	99.26	refseq	FMT-1	Pretreatment
CATTATC_TTGACTC_GAACCTA	Phocaeicola vulgatus	GCF_020091465.1	99.26	refseq	FMT-1	Pretreatment
CTAATGG_GAGTCCG_TCTCAGC	Thomasclavelia ramosa	GCF_014131695.1	99.26	refseq	FMT-1	Pretreatment
TACACGA_CAGGTGC_TGATTTC	Thomasclavelia ramosa	GCF_016027135.1	99.26	refseq	FMT-1	Pretreatment
TTGAACG_CAGGTGC_GCTGCAG	Mediterraneibacter gnavus	GCF_016904015.1	99.26	refseq	FMT-1	Pretreatment
TCTCATA_GTCGTAA_GATCTAG	Thomasclavelia ramosa	GCF_014131695.1	99.26	refseq	FMT-1	Pretreatment
TGAGCCG_GTGAAGG_ACACTGA	Thomasclavelia ramosa	GCF_016728785.1	99.26	refseq	FMT-1	Pretreatment
TACGGGC_CATTCGC_GTGTGCG	Phocaeicola vulgatus	GCF_024758205.1	99.26	refseq	FMT-1	Pretreatment
GTGGGTC_AAACGTC_AAAGATG	Thomasclavelia ramosa	GCF_016027135.1	99.26	refseq	FMT-1	Pretreatment
TTTATGC_CGAATGT_CTTGGCT	Thomasclavelia ramosa	GCF_016027135.1	99.26	refseq	FMT-1	Pretreatment
GTGTTAG_ACTGAAC_TTGCCGT	Anaerostipes caccae	GCF_036419175.1	99.26	refseq	FMT-1	Pretreatment
TATCTCA_TTCGAAG_GTGTGCG	Thomasclavelia ramosa	GCF_016027135.1	99.26	refseq	FMT-1	Pretreatment
AGGCCAC_AAGACCT_TGAGAGG	Blautia coccoides	GCF_034355335.1	99.25	refseq	FMT-1	Pretreatment
CAGAGAG_TTGGAAC_CACACTC	Phocaeicola vulgatus	GCF_024758205.1	99.25	refseq	FMT-1	Pretreatment
CTAGCCT_TTTGCCA_CGTAGCG	Thomasclavelia ramosa	GCF_016728785.1	99.25	refseq	FMT-1	Pretreatment
GCATGCG_TGACTTT_GATCAGT	Thomasclavelia ramosa	GCF_016728785.1	99.25	refseq	FMT-1	Pretreatment
GAGCAGA_TTGACTC_AGTGGGA	Phocaeicola vulgatus	GCF_024758205.1	99.25	refseq	FMT-1	Pretreatment
GAAATGA_GTTCTCG_TCGAGGC	Thomasclavelia ramosa	GCF_016027135.1	99.25	refseq	FMT-1	Pretreatment
CTCTACG_AGACATA_TGATTTC	Thomasclavelia ramosa	GCF_016027135.1	99.25	refseq	FMT-1	Pretreatment
CGCTTCA_ACGTAAA_TCGTAGA	Phocaeicola vulgatus	GCF_020091465.1	99.25	refseq	FMT-1	Pretreatment
TGCCAAA_CACAAGG_TCTCAGC	Thomasclavelia ramosa	GCF_014131695.1	99.25	refseq	FMT-1	Pretreatment
AAGACCT_GTATAAG_ACGCAGC	Thomasclavelia ramosa	GCF_014131695.1	99.24	refseq	FMT-1	Pretreatment
AACCGCG_GCCTCTA_GCGCAAC	Thomasclavelia ramosa	GCF_016728785.1	99.24	refseq	FMT-1	Pretreatment
CGGAGCT_GTGAAGG_GACGTTA	Eggerthella lenta	GCF_021378705.1	99.24	refseq	FMT-1	Pretreatment
CAGTCCT_GCACATA_GCCAAAT	Phocaeicola vulgatus	GCF_020091465.1	99.24	refseq	FMT-1	Pretreatment
GAAATGA_CAAGTTG_AGTAGTC	Thomasclavelia ramosa	GCF_014131695.1	99.24	refseq	FMT-1	Pretreatment
AGGGTGA_GATCGTA_ACTACCT	Thomasclavelia ramosa	GCF_016027135.1	99.24	refseq	FMT-1	Pretreatment
TTTATGC_GCGATCA_CAGTAAC	Thomasclavelia ramosa	GCF_016728785.1	99.24	refseq	FMT-1	Pretreatment
TGGCGCA_GAAACTC_CTAAGAC	Thomasclavelia ramosa	GCF_020097255.1	99.24	refseq	FMT-1	Pretreatment
TTGCGTC_GTATAAG_CTCACAC	Thomasclavelia ramosa	GCF_014131695.1	99.24	refseq	FMT-1	Pretreatment
TTAGGCA_TTTGCCA_AATCTTG	Phocaeicola vulgatus	GCF_020091465.1	99.24	refseq	FMT-1	Pretreatment
TGCCAAA_GCACATA_TGGCGCA	Phocaeicola vulgatus	GCF_020091465.1	99.24	refseq	FMT-1	Pretreatment
GGACGTC_AGGTGTA_AGGAGGT	Thomasclavelia ramosa	GCF_014131695.1	99.24	refseq	FMT-1	Pretreatment
GCAGCCA_AGGTGTA_GCTGGGT	Thomasclavelia ramosa	GCF_016027135.1	99.23	refseq	FMT-1	Pretreatment
AGAGCTT_GTATAAG_GACGTTA	Phocaeicola vulgatus	GCF_020091465.1	99.23	refseq	FMT-1	Pretreatment
CTAAGAC_GTGAAGG_ACCGTAA	Thomasclavelia ramosa	GCF_016027135.1	99.23	refseq	FMT-1	Pretreatment
GATCGAT_CGGAGCT_AACTCTT	Thomasclavelia ramosa	GCF_016027135.1	99.23	refseq	FMT-1	Pretreatment
CAAGAAA_AATCGGT_TACAGTG	Thomasclavelia ramosa	GCF_014131695.1	99.23	refseq	FMT-1	Pretreatment
CGCTTCA_GCTGCTT_TTCGGAC	Thomasclavelia ramosa	GCF_014131695.1	99.23	refseq	FMT-1	Pretreatment
GAAATGA_TTGACTC_CAGTAAC	Phocaeicola vulgatus	GCF_024758205.1	99.23	refseq	FMT-1	Pretreatment
CCTACAC_GACCAAT_GAAATGA	Thomasclavelia ramosa	GCF_014131695.1	99.23	refseq	FMT-1	Pretreatment
CTGCCTA_CACACCT_CGCGTTT	Blautia coccoides	GCF_034355335.1	99.23	refseq	FMT-1	Pretreatment
CTAATGG_CGTTGGG_TTGGCAA	Thomasclavelia ramosa	GCF_014131695.1	99.23	refseq	FMT-1	Pretreatment
CGTAGCG_GGGTTGC_GTAATCG	Thomasclavelia ramosa	GCF_016027135.1	99.23	refseq	FMT-1	Pretreatment
CACATTT_TTAGGAC_GTAATCG	Thomasclavelia ramosa	GCF_016027135.1	99.23	refseq	FMT-1	Pretreatment
GAATAAG_CGTGTCT_TAAGCGT	Thomasclavelia ramosa	GCF_014131695.1	99.23	refseq	FMT-1	Pretreatment
AGAGCTT_AATCGGT_TACAGTG	Thomasclavelia ramosa	GCF_016728785.1	99.23	refseq	FMT-1	Pretreatment
CACACAA_GTTCTCG_ATCCGAA	Thomasclavelia ramosa	GCF_020097255.1	99.23	refseq	FMT-1	Pretreatment
CAGAGAG_CAGGTGC_GGTAGTG	Thomasclavelia ramosa	GCF_016027135.1	99.23	refseq	FMT-1	Pretreatment
GAGCAGA_AACTCAG_GTTGCTT	Thomasclavelia ramosa	GCF_014131695.1	99.23	refseq	FMT-1	Pretreatment
CAGAGAG_GTATAAG_ATTACTC	Thomasclavelia ramosa	GCF_016027135.1	99.23	refseq	FMT-1	Pretreatment
AGGGTGA_TCTGAGA_ACCGTAA	Thomasclavelia ramosa	GCF_014131695.1	99.23	refseq	FMT-1	Pretreatment
GATCGAT_GTTCTCG_TCAACGA	Phocaeicola vulgatus	GCF_024758205.1	99.23	refseq	FMT-1	Pretreatment
CCTACAC_TCGTCTT_AGTGGGA	Thomasclavelia ramosa	GCF_016728785.1	99.23	refseq	FMT-1	Pretreatment
AAGACCT_GTCGTAA_GCCAAAT	Thomasclavelia ramosa	GCF_016728785.1	99.23	refseq	FMT-1	Pretreatment
CACACAA_GGTAGTG_TGGCGCA	Thomasclavelia ramosa	GCF_014131695.1	99.23	refseq	FMT-1	Pretreatment
AGGCCAC_GACGTGC_TAGACCA	Thomasclavelia ramosa	GCF_016027135.1	99.23	refseq	FMT-1	Pretreatment
CAGCAGC_TCTATTG_GTGCTTC	Phocaeicola vulgatus	GCF_024758205.1	99.23	refseq	FMT-1	Pretreatment
CAAGAAA_CGGAGCT_ATCCGAA	Thomasclavelia ramosa	GCF_016027135.1	99.23	refseq	FMT-1	Pretreatment
ATCACGA_CATTCGC_CGGAGTC	Thomasclavelia ramosa	GCF_014131695.1	99.23	refseq	FMT-1	Pretreatment
ACTTGTT_CGTGTCT_ATAAGGG	Thomasclavelia ramosa	GCF_014131695.1	99.23	refseq	FMT-1	Pretreatment
CATTATC_CATTCGC_GGATGTT	Phocaeicola vulgatus	GCF_024758205.1	99.23	refseq	FMT-1	Pretreatment
CTTAGGA_TGGCTGG_CTCACAC	Thomasclavelia ramosa	GCF_016027135.1	99.23	refseq	FMT-1	Pretreatment
CGGAGCT_ATCATTC_AGCTCCT	Thomasclavelia ramosa	GCF_014131695.1	99.23	refseq	FMT-1	Pretreatment
ATGTGTG_GACCAAT_TTCGGAC	Thomasclavelia ramosa	GCF_016728785.1	99.23	refseq	FMT-1	Pretreatment
ATGTGTG_ACACCGG_ATTCTAC	Phocaeicola vulgatus	GCF_020091465.1	99.23	refseq	FMT-1	Pretreatment
CTTAGGA_CGGTTAA_CGATTAT	Thomasclavelia ramosa	GCF_014131695.1	99.23	refseq	FMT-1	Pretreatment
AGGCCAC_GCCTCTA_TTGCCGT	Phocaeicola vulgatus	GCF_020091465.1	99.23	refseq	FMT-1	Pretreatment
ACGATAC_ACCAAGT_GCGCAAC	Anaerostipes caccae	GCF_036419175.1	99.23	refseq	FMT-1	Pretreatment
CTCGGAG_TGACTTT_ATTCTAC	[Clostridium] innocuum	GCF_023008265.1	99.23	refseq	FMT-1	Pretreatment
ATGTGTG_GGGTTGC_CGATTAT	Thomasclavelia ramosa	GCF_016027135.1	99.23	refseq	FMT-1	Pretreatment
GCTCTGT_TGAGGGA_AGTAGTC	Thomasclavelia ramosa	GCF_016728785.1	99.23	refseq	FMT-1	Pretreatment
CTAAGAC_TACTTGT_AGAAAGG	Thomasclavelia ramosa	GCF_016027135.1	99.23	refseq	FMT-1	Pretreatment
CAGCTAA_CAGGTGC_TGATTTC	Thomasclavelia ramosa	GCF_016728785.1	99.23	refseq	FMT-1	Pretreatment
CAGTCCT_GCTGCTT_AGTAGTC	Phocaeicola vulgatus	GCF_024022975.1	99.23	refseq	FMT-1	Pretreatment
GAGCAGA_CTCAATA_ACGATAC	Thomasclavelia ramosa	GCF_016728785.1	99.23	refseq	FMT-1	Pretreatment
CTCGGAG_TGGCTGG_AAAGATG	Thomasclavelia ramosa	GCF_014131695.1	99.23	refseq	FMT-1	Pretreatment
GCTGGGT_GTGCGGT_GTATCTT	Phocaeicola vulgatus	GCF_024758205.1	99.23	refseq	FMT-1	Pretreatment
TTTATGC_GGGCACT_TCGTAGA	Anaerostipes caccae	GCF_036419175.1	99.23	refseq	FMT-1	Pretreatment
GTATCTT_GAATGAA_TACAGTG	Thomasclavelia ramosa	GCF_016728785.1	99.23	refseq	FMT-1	Pretreatment
TCAGGAT_TGAGCCG_CGACTTC	Thomasclavelia ramosa	GCF_016027135.1	99.23	refseq	FMT-1	Pretreatment
GGTATTG_CGCGGTA_TCGAGGC	Phocaeicola vulgatus	GCF_024758205.1	99.23	refseq	FMT-1	Pretreatment
GTGCAGC_AGACATA_GAAATGA	Thomasclavelia ramosa	GCF_016027135.1	99.23	refseq	FMT-1	Pretreatment
GTGTTAG_GGAAAGC_GATCTAG	Thomasclavelia ramosa	GCF_016728785.1	99.23	refseq	FMT-1	Pretreatment
GTATCTT_CACACCT_AAAGATG	Thomasclavelia ramosa	GCF_014131695.1	99.23	refseq	FMT-1	Pretreatment
GGCAATT_GATCGTA_AGCTCCT	Thomasclavelia ramosa	GCF_016728785.1	99.23	refseq	FMT-1	Pretreatment
GTAACGT_AGCGTCG_GAACCTA	Thomasclavelia ramosa	GCF_016027135.1	99.23	refseq	FMT-1	Pretreatment
TAGCCGG_GCTGCTT_ATTTCTG	Thomasclavelia ramosa	GCF_016728785.1	99.23	refseq	FMT-1	Pretreatment
GTGGGTC_CGTGTCT_TAAGCGT	Thomasclavelia ramosa	GCF_014131695.1	99.23	refseq	FMT-1	Pretreatment
TTGCGTC_CGTAGCA_TCGTAGA	Thomasclavelia ramosa	GCF_016027135.1	99.23	refseq	FMT-1	Pretreatment
TGAGCCG_GCTGCTT_AAACAAC	Eggerthella lenta	GCF_021378625.1	99.23	refseq	FMT-1	Pretreatment
TTTACTG_CTCTACG_ACTGAGT	Thomasclavelia ramosa	GCF_016728785.1	99.23	refseq	FMT-1	Pretreatment
TTTATGC_GTATAAG_ATTACTC	Thomasclavelia ramosa	GCF_014131695.1	99.23	refseq	FMT-1	Pretreatment
GGCTCGA_CACAAGG_TAAGCGT	Phocaeicola vulgatus	GCF_020091465.1	99.23	refseq	FMT-1	Pretreatment
GTGGGTC_CGTTGGG_ACCGTAA	Phocaeicola vulgatus	GCF_020091465.1	99.23	refseq	FMT-1	Pretreatment
TCGTAGA_GGAAAGC_CTGAAAC	Thomasclavelia ramosa	GCF_016728785.1	99.23	refseq	FMT-1	Pretreatment
TTAGGCA_GGCCGAT_TGGGAAG	Thomasclavelia ramosa	GCF_014131695.1	99.23	refseq	FMT-1	Pretreatment
TACACGA_GGGTTGC_TACAGTG	Thomasclavelia ramosa	GCF_016027135.1	99.23	refseq	FMT-1	Pretreatment
GGTATTG_GCCTCTA_GCTGCAG	Thomasclavelia ramosa	GCF_014131695.1	99.23	refseq	FMT-1	Pretreatment
TAGCCGG_CGATGTA_GTGCTTC	Thomasclavelia ramosa	GCF_016027135.1	99.23	refseq	FMT-1	Pretreatment
TCAGGAT_GTCGTAA_CGAACAT	Anaerostipes caccae	GCF_036419175.1	99.23	refseq	FMT-1	Pretreatment
GTATCTT_CGCGGTA_AGCTCCT	Flavonifractor plautii	GCF_023008285.1	99.23	refseq	FMT-1	Pretreatment
TTGAACG_TTCGAAG_GAACCTA	Thomasclavelia ramosa	GCF_016728785.1	99.23	refseq	FMT-1	Pretreatment
TTGAACG_CGATGTA_AGAATCT	Thomasclavelia ramosa	GCF_016728785.1	99.23	refseq	FMT-1	Pretreatment
GGCTCGA_ACGGGTC_AACTCTT	Thomasclavelia ramosa	GCF_016027135.1	99.23	refseq	FMT-1	Pretreatment
GTAACGT_GGAAAGC_GTTGCTT	Thomasclavelia ramosa	GCF_016027135.1	99.23	refseq	FMT-1	Pretreatment
TGCTGCT_CGCGGTA_TGGCGCA	Thomasclavelia ramosa	GCF_016728785.1	99.23	refseq	FMT-1	Pretreatment
TCAGCTC_AATCGGT_GTGCTTC	Phocaeicola vulgatus	GCF_020091465.1	99.23	refseq	FMT-1	Pretreatment
TTGCGTC_GGGCACT_CGGAGTC	Phocaeicola vulgatus	GCF_036419465.1	99.23	refseq	FMT-1	Pretreatment
AGTAGTC_TTCGAAG_CGATTAT	Thomasclavelia ramosa	GCF_016728785.1	99.22	refseq	FMT-1	Pretreatment
ACCGTAA_GTTCATT_CGAACAT	Thomasclavelia ramosa	GCF_016728785.1	99.22	refseq	FMT-1	Pretreatment
GATCGAT_TAAGAGA_CGTAGCG	Thomasclavelia ramosa	GCF_016027135.1	99.22	refseq	FMT-1	Pretreatment
ATTCTAC_GACGTGC_TCAGATG	Thomasclavelia ramosa	GCF_014131695.1	99.22	refseq	FMT-1	Pretreatment
CGCTTCA_GTGCGGT_ATAAGGG	Thomasclavelia ramosa	GCF_020097255.1	99.22	refseq	FMT-1	Pretreatment
ACGCCGA_CTCCTAG_CACACTC	Thomasclavelia ramosa	GCF_016027135.1	99.22	refseq	FMT-1	Pretreatment
CGGAGCT_CACAAGG_GGGTTGC	Hungatella hathewayi	GCF_025149285.1	99.22	refseq	FMT-1	Pretreatment
ACTGATG_AAGACCT_ATAAGGG	Thomasclavelia ramosa	GCF_016027135.1	99.22	refseq	FMT-1	Pretreatment
CACATTT_GTAACTG_ATTACTC	Thomasclavelia ramosa	GCF_016728785.1	99.22	refseq	FMT-1	Pretreatment
GCAGCCA_ACGAGGA_CAGTAAC	Thomasclavelia ramosa	GCF_014131695.1	99.22	refseq	FMT-1	Pretreatment
CACATTT_TCAGATG_ATTCTAC	Thomasclavelia ramosa	GCF_016027135.1	99.22	refseq	FMT-1	Pretreatment
GAATAAG_CACCTTA_AAAGATG	Thomasclavelia ramosa	GCF_016728785.1	99.22	refseq	FMT-1	Pretreatment
CACACAA_CAGGTGC_ACTGAGT	Thomasclavelia ramosa	GCF_016728785.1	99.22	refseq	FMT-1	Pretreatment
CGAACAT_TAGGCAT_GCGGGTT	Phocaeicola vulgatus	GCF_020091465.1	99.22	refseq	FMT-1	Pretreatment
GCAGCCA_ACTGAAC_GATCAGT	Thomasclavelia ramosa	GCF_016027135.1	99.22	refseq	FMT-1	Pretreatment
ATGTGTG_CTCACAC_TTGGCAA	Thomasclavelia ramosa	GCF_020097255.1	99.22	refseq	FMT-1	Pretreatment
GAGCAGA_GAAACTC_GGAACTT	Thomasclavelia ramosa	GCF_016728785.1	99.22	refseq	FMT-1	Pretreatment
CGAGAAG_CAAGTTG_TTCGGAC	Thomasclavelia ramosa	GCF_016027135.1	99.22	refseq	FMT-1	Pretreatment
GCTCTGT_AATCGGT_AAAGATG	Thomasclavelia ramosa	GCF_016027135.1	99.22	refseq	FMT-1	Pretreatment
GAGCAGA_ATTGGAC_TCCACAC	Thomasclavelia ramosa	GCF_014131695.1	99.22	refseq	FMT-1	Pretreatment
CTGCCTA_TTCTCAA_CTGCGGA	Thomasclavelia ramosa	GCF_016728785.1	99.22	refseq	FMT-1	Pretreatment
CAGCTAA_GTTCATT_AGAATCT	Thomasclavelia ramosa	GCF_014131695.1	99.22	refseq	FMT-1	Pretreatment
CTTCTCT_TACTTGT_CTTGGCT	Thomasclavelia ramosa	GCF_016728785.1	99.22	refseq	FMT-1	Pretreatment
GCAGCCA_TCAGATG_AGGAGGT	Thomasclavelia ramosa	GCF_014131695.1	99.22	refseq	FMT-1	Pretreatment
CTGCCTA_AAATCCA_GGCGACT	Thomasclavelia ramosa	GCF_016728785.1	99.22	refseq	FMT-1	Pretreatment
AACGTTG_TCGTCTT_CGTTAGA	Phocaeicola vulgatus	GCF_000012825.1	99.22	refseq	FMT-1	Pretreatment
AGAGCTT_ACGAGGA_CTCCTAG	Thomasclavelia ramosa	GCF_016027135.1	99.22	refseq	FMT-1	Pretreatment
AGGGTGA_GCTGCTT_TCTGGAA	Phocaeicola vulgatus	GCF_024758205.1	99.22	refseq	FMT-1	Pretreatment
GCTGCAG_GTGAAGG_TCGAGGC	Phocaeicola vulgatus	GCF_000012825.1	99.22	refseq	FMT-1	Pretreatment
CGATGGC_TCACGAA_CTCGAAA	Thomasclavelia ramosa	GCF_014131695.1	99.22	refseq	FMT-1	Pretreatment
GAGCAGA_TCGTCTT_ACACTGA	Thomasclavelia ramosa	GCF_016728785.1	99.22	refseq	FMT-1	Pretreatment
AACCGCG_CTCTACG_GGATGTT	Thomasclavelia ramosa	GCF_016027135.1	99.22	refseq	FMT-1	Pretreatment
GAATAAG_AACTCAG_ACGATAC	Thomasclavelia ramosa	GCF_016728785.1	99.22	refseq	FMT-1	Pretreatment
GCGCCAA_GCGCGAT_ACGCAGC	Thomasclavelia ramosa	GCF_020097255.1	99.22	refseq	FMT-1	Pretreatment
TATCTCA_TATCTCA_ACTACCT	Thomasclavelia ramosa	GCF_016728785.1	99.22	refseq	FMT-1	Pretreatment
GTGTTAG_CTCCTAG_CACACTC	Thomasclavelia ramosa	GCF_014131695.1	99.22	refseq	FMT-1	Pretreatment
GTTCATT_GAGTCCG_TCTCAGC	Thomasclavelia ramosa	GCF_014131695.1	99.22	refseq	FMT-1	Pretreatment
TACGGGC_GCGATCA_CTGCGGA	Thomasclavelia ramosa	GCF_016027135.1	99.22	refseq	FMT-1	Pretreatment
GTGCAGC_ACGAGGA_ACGATAC	Phocaeicola vulgatus	GCF_020091465.1	99.22	refseq	FMT-1	Pretreatment
TAGCCGG_ACTTTCA_CACAAAC	Thomasclavelia ramosa	GCF_016728785.1	99.22	refseq	FMT-1	Pretreatment
TTTATGC_ACCAAGT_TAAGCGT	Thomasclavelia ramosa	GCF_014131695.1	99.22	refseq	FMT-1	Pretreatment
TGGCGCA_GGAAAGC_CTCCTAG	Thomasclavelia ramosa	GCF_014131695.1	99.22	refseq	FMT-1	Pretreatment
TTGAACG_GCGATCA_GTAATCG	Phocaeicola vulgatus	GCF_020091465.1	99.22	refseq	FMT-1	Pretreatment
GGCAATT_CAGGTGC_ACCGTAA	Phocaeicola vulgatus	GCF_024759565.1	99.22	refseq	FMT-1	Pretreatment
TCAGGAT_GTTCTCG_GGAGCAA	Thomasclavelia ramosa	GCF_014131695.1	99.22	refseq	FMT-1	Pretreatment
TAGCCGG_CGGTTAA_ATTCTAC	Phocaeicola vulgatus	GCF_020091465.1	99.22	refseq	FMT-1	Pretreatment
TTTACTG_TAAGAGA_GGTAGTG	Thomasclavelia ramosa	GCF_014131695.1	99.22	refseq	FMT-1	Pretreatment
GTAACGT_GTATAAG_ACGCAGC	Thomasclavelia ramosa	GCF_016027135.1	99.22	refseq	FMT-1	Pretreatment
TTGAACG_CATTCGC_TCGAGGC	Thomasclavelia ramosa	GCF_016728785.1	99.22	refseq	FMT-1	Pretreatment
TAGCCGG_ACTGAAC_CTAAGAC	Thomasclavelia ramosa	GCF_014131695.1	99.22	refseq	FMT-1	Pretreatment
TGGCGCA_TCTATTG_TGGACGC	Thomasclavelia ramosa	GCF_014131695.1	99.22	refseq	FMT-1	Pretreatment
GTAACGT_TTCTCAA_AAAGATG	Phocaeicola vulgatus	GCF_024022975.1	99.22	refseq	FMT-1	Pretreatment
TTCGGTC_TGCTTGC_GAAATGA	Thomasclavelia ramosa	GCF_014131695.1	99.22	refseq	FMT-1	Pretreatment
GTAACGT_GTAACTG_ACGGCCA	Thomasclavelia ramosa	GCF_014131695.1	99.22	refseq	FMT-1	Pretreatment
TACACGA_CACTCCA_AAACAAC	Thomasclavelia ramosa	GCF_016027135.1	99.22	refseq	FMT-1	Pretreatment
TCTTCGG_TGAGCCG_TACTCAT	Phocaeicola vulgatus	GCF_020091465.1	99.22	refseq	FMT-1	Pretreatment
TACACGA_AAGACCT_AGCTCCT	Thomasclavelia ramosa	GCF_016027135.1	99.22	refseq	FMT-1	Pretreatment
GTGCAGC_CTTCTCT_AAACAAC	Thomasclavelia ramosa	GCF_014131695.1	99.22	refseq	FMT-1	Pretreatment
AGCGTCG_TGAGCCG_GCTGCAG	Phocaeicola vulgatus	GCF_020885775.1	99.21	refseq	FMT-1	Pretreatment
CTAGCCT_TCGTCTT_GCATGAT	Phocaeicola vulgatus	GCF_020091465.1	99.21	refseq	FMT-1	Pretreatment
GAGCAGA_CTCCTAG_CGATTAT	Thomasclavelia ramosa	GCF_014131695.1	99.21	refseq	FMT-1	Pretreatment
AACGTTG_CATTCGC_GAAATGA	[Clostridium] innocuum	GCF_022845735.1	99.21	refseq	FMT-1	Pretreatment
TGGCGCA_GGCCGAT_TCAGATG	Thomasclavelia ramosa	GCF_016027135.1	99.21	refseq	FMT-1	Pretreatment
GCATGCG_TTCGAAG_ACCGTAA	Thomasclavelia ramosa	GCF_016027135.1	99.2	refseq	FMT-1	Pretreatment
AACGTTG_GGAAAGC_TCTCAGC	Thomasclavelia ramosa	GCF_016027135.1	99.2	refseq	FMT-1	Pretreatment
AAGGTTC_GAAACTC_TCGTAGA	Alistipes finegoldii	GCF_000265365.1	99.2	refseq	FMT-1	Pretreatment
CGTGAGC_CGGAGCT_CGCGTTT	Thomasclavelia ramosa	GCF_016027135.1	99.2	refseq	FMT-1	Pretreatment
ACGATAC_CTTCTCT_GTTGCTT	Thomasclavelia ramosa	GCF_016027135.1	99.2	refseq	FMT-1	Pretreatment
TTAGGCA_AATCGGT_GCGCAAC	Thomasclavelia ramosa	GCF_016728785.1	99.2	refseq	FMT-1	Pretreatment
GTTCATT_ACGCAGA_CACACTC	Thomasclavelia ramosa	GCF_016027135.1	99.2	refseq	FMT-1	Pretreatment
TACTTAC_TAGGCAT_AGAATCT	Thomasclavelia ramosa	GCF_014131695.1	99.2	refseq	FMT-1	Pretreatment
GGCTCGA_GAAACTC_AATCTTG	Phocaeicola vulgatus	GCF_020091465.1	99.2	refseq	FMT-1	Pretreatment
GGCTCGA_TTGGAAC_AAACAAC	Thomasclavelia ramosa	GCF_016728785.1	99.2	refseq	FMT-1	Pretreatment
GTAACGT_AACCATG_AGAAAGG	Thomasclavelia ramosa	GCF_016027135.1	99.2	refseq	FMT-1	Pretreatment
TCACGAA_CAGATCA_AGAAAGG	Thomasclavelia ramosa	GCF_016027135.1	99.2	refseq	FMT-1	Pretreatment
CTCGGAG_TGAGCCG_CAGTAAC	Phocaeicola vulgatus	GCF_008728395.1	99.19	refseq	FMT-1	Pretreatment
GCTGCAG_GCATACA_CTCGAAA	Thomasclavelia ramosa	GCF_016027135.1	99.19	refseq	FMT-1	Pretreatment
CTGCCTA_TGACTTT_CGCTATC	Thomasclavelia ramosa	GCF_014131695.1	99.19	refseq	FMT-1	Pretreatment
CGGAGCT_CATTCGC_CAGTAAC	Thomasclavelia ramosa	GCF_016027135.1	99.19	refseq	FMT-1	Pretreatment
GAGCAGA_AAATCCA_ATTTCTG	Thomasclavelia ramosa	GCF_014131695.1	99.19	refseq	FMT-1	Pretreatment
GAATAAG_GCGATCA_ATTTCTG	Thomasclavelia ramosa	GCF_014131695.1	99.19	refseq	FMT-1	Pretreatment
AGTAGTC_GGCCGAT_ACGCAGC	Thomasclavelia ramosa	GCF_014131695.1	99.19	refseq	FMT-1	Pretreatment
AACGTTG_TCAGATG_CTGAAAC	Phocaeicola vulgatus	GCF_020091465.1	99.19	refseq	FMT-1	Pretreatment
CGTGAGC_GGGCACT_CTCACAC	Thomasclavelia ramosa	GCF_016027135.1	99.19	refseq	FMT-1	Pretreatment
CGATGGC_CACAAGG_TCCACAC	Phocaeicola vulgatus	GCF_020091465.1	99.19	refseq	FMT-1	Pretreatment
CTTAGGA_CTCAATA_AAATGAG	Thomasclavelia ramosa	GCF_014131695.1	99.19	refseq	FMT-1	Pretreatment
GCAGCCA_TCTATTG_CTGAAAC	Thomasclavelia ramosa	GCF_014131695.1	99.19	refseq	FMT-1	Pretreatment
GACCTGG_GTAACTG_TCCACAC	Thomasclavelia ramosa	GCF_016728785.1	99.19	refseq	FMT-1	Pretreatment
CAGCAGC_GACCAAT_TGGCGCA	Phocaeicola vulgatus	GCF_020091465.1	99.19	refseq	FMT-1	Pretreatment
CAGCAGC_AGACATA_GTATCTT	Phocaeicola vulgatus	GCF_024758205.1	99.19	refseq	FMT-1	Pretreatment
GCGCCAA_CGATGTA_CGTAGCG	Phocaeicola vulgatus	GCF_024759565.1	99.19	refseq	FMT-1	Pretreatment
CGAACAT_TGACTTT_TTGGCAA	Phocaeicola vulgatus	GCF_024758205.1	99.19	refseq	FMT-1	Pretreatment
ATCACGA_TATCTCA_GATCAGT	Thomasclavelia ramosa	GCF_014131695.1	99.19	refseq	FMT-1	Pretreatment
GCAGCCA_ATAAGAG_GATCTAG	Thomasclavelia ramosa	GCF_014131695.1	99.19	refseq	FMT-1	Pretreatment
AAGGTTC_CTTCTCT_AGTAGTC	Thomasclavelia ramosa	GCF_016728785.1	99.19	refseq	FMT-1	Pretreatment
GGAAAGC_AAACGTC_CGTAGCG	Thomasclavelia ramosa	GCF_016027135.1	99.19	refseq	FMT-1	Pretreatment
CGATGGC_TTCTCAA_GTGCTTC	Thomasclavelia ramosa	GCF_016728785.1	99.19	refseq	FMT-1	Pretreatment
GCTCTGT_CATATCG_AGCGGTC	Thomasclavelia ramosa	GCF_016728785.1	99.19	refseq	FMT-1	Pretreatment
AGCGTCG_GGGCACT_CGCGTTT	Thomasclavelia ramosa	GCF_014131695.1	99.19	refseq	FMT-1	Pretreatment
ACGATAC_AAGACCT_TGGCGCA	Thomasclavelia ramosa	GCF_016027135.1	99.19	refseq	FMT-1	Pretreatment
CCTACAC_GTCGTAA_GAAATGA	Thomasclavelia ramosa	GCF_014131695.1	99.19	refseq	FMT-1	Pretreatment
AGTAGTC_AGGTGTA_GGCGACT	Thomasclavelia ramosa	GCF_014131695.1	99.19	refseq	FMT-1	Pretreatment
ACTTGTT_AAGACCT_GCCAAAT	Thomasclavelia ramosa	GCF_020097255.1	99.19	refseq	FMT-1	Pretreatment
AACGTTG_AACTCAG_TTGGCAA	Phocaeicola vulgatus	GCF_008728395.1	99.19	refseq	FMT-1	Pretreatment
CAGCAGC_GTGCGGT_CAGCAGC	Thomasclavelia ramosa	GCF_014131695.1	99.19	refseq	FMT-1	Pretreatment
CGAACAT_TTAGGAC_TCCACAC	Thomasclavelia ramosa	GCF_016027135.1	99.19	refseq	FMT-1	Pretreatment
ACTGATG_CGGTTAA_AGCTCCT	Thomasclavelia ramosa	GCF_016728785.1	99.19	refseq	FMT-1	Pretreatment
AGCTCTC_GAAACTC_CGATTAT	Thomasclavelia ramosa	GCF_014131695.1	99.19	refseq	FMT-1	Pretreatment
AGAGCTT_ACTGAAC_TCGTAGA	Thomasclavelia ramosa	GCF_016728785.1	99.19	refseq	FMT-1	Pretreatment
GATCGAT_ACGGGTC_GAACCTA	Thomasclavelia ramosa	GCF_014131695.1	99.19	refseq	FMT-1	Pretreatment
GACTACA_CACACCT_GCTGGGT	Thomasclavelia ramosa	GCF_016728785.1	99.19	refseq	FMT-1	Pretreatment
CTAATGG_CTTCTCT_CTCCTAG	Phocaeicola vulgatus	GCF_024758205.1	99.19	refseq	FMT-1	Pretreatment
AGGCCAC_CGTAGCA_CTCGAAA	Thomasclavelia ramosa	GCF_014131695.1	99.19	refseq	FMT-1	Pretreatment
CAGAGAG_AGCGTCG_TCTGGAA	Thomasclavelia ramosa	GCF_014131695.1	99.19	refseq	FMT-1	Pretreatment
GACGTTA_TCAGATG_CTAAGAC	Thomasclavelia ramosa	GCF_016027135.1	99.19	refseq	FMT-1	Pretreatment
GAATAAG_TCAGATG_GGTAGTG	Thomasclavelia ramosa	GCF_016027135.1	99.19	refseq	FMT-1	Pretreatment
AGGGTGA_AAACGTC_ACGGCCA	Thomasclavelia ramosa	GCF_014131695.1	99.19	refseq	FMT-1	Pretreatment
GAAATGA_CGCGGTA_CTGAAAC	Thomasclavelia ramosa	GCF_016027135.1	99.19	refseq	FMT-1	Pretreatment
CTTCTCT_ACGTAAA_CTGCGGA	Phocaeicola vulgatus	GCF_020091465.1	99.19	refseq	FMT-1	Pretreatment
AAACCTG_AGTTACG_TCAGATG	Thomasclavelia ramosa	GCF_020097255.1	99.19	refseq	FMT-1	Pretreatment
AGTAGTC_ACCAAGT_AACTCTT	Thomasclavelia ramosa	GCF_016728785.1	99.19	refseq	FMT-1	Pretreatment
AGCTCTC_GTTCTCG_GCACTCT	Thomasclavelia ramosa	GCF_016027135.1	99.19	refseq	FMT-1	Pretreatment
CAGAGAG_TTCTCAA_GTTGCTT	Thomasclavelia ramosa	GCF_020097255.1	99.19	refseq	FMT-1	Pretreatment
CGTAGCG_TAGGCAT_AGGAGGT	Thomasclavelia ramosa	GCF_014131695.1	99.19	refseq	FMT-1	Pretreatment
AACCGCG_AGTTACG_GGATGTT	Thomasclavelia ramosa	GCF_016728785.1	99.19	refseq	FMT-1	Pretreatment
CAGCTAA_GTTCTCG_AAAGATG	Thomasclavelia ramosa	GCF_016728785.1	99.19	refseq	FMT-1	Pretreatment
CAAGAAA_TCTATTG_CGATTAT	Thomasclavelia ramosa	GCF_014131695.1	99.19	refseq	FMT-1	Pretreatment
GCTGCAG_GTTCTCG_CATTCGC	Thomasclavelia ramosa	GCF_014131695.1	99.19	refseq	FMT-1	Pretreatment
AGCTCTC_AGGTGTA_CTCGAAA	Thomasclavelia ramosa	GCF_016728785.1	99.19	refseq	FMT-1	Pretreatment
CGATGGC_GGGCACT_CAGCAGC	Thomasclavelia ramosa	GCF_014131695.1	99.19	refseq	FMT-1	Pretreatment
GCGCCAA_GGAGCAA_CACAAAC	Phocaeicola vulgatus	GCF_020091465.1	99.19	refseq	FMT-1	Pretreatment
CGAACAT_CTCACAC_GCACTCT	Thomasclavelia ramosa	GCF_016728785.1	99.19	refseq	FMT-1	Pretreatment
GTGGGTC_GTGAAGG_AACTCTT	Thomasclavelia ramosa	GCF_016027135.1	99.19	refseq	FMT-1	Pretreatment
TCAGCTC_AGCCTAA_GCTGCAG	Thomasclavelia ramosa	GCF_016728785.1	99.19	refseq	FMT-1	Pretreatment
GGACGTC_TAAGAGA_GTTGCTT	Thomasclavelia ramosa	GCF_016728785.1	99.19	refseq	FMT-1	Pretreatment
TACACGA_TGACTTT_GGGTTGC	Phocaeicola vulgatus	GCF_024022975.1	99.19	refseq	FMT-1	Pretreatment
TTTACTG_TAGGCAT_TCAGATG	Thomasclavelia ramosa	GCF_016027135.1	99.19	refseq	FMT-1	Pretreatment
GTATCTT_CAAGTTG_CACAAAC	Thomasclavelia ramosa	GCF_016027135.1	99.19	refseq	FMT-1	Pretreatment
GGAAAGC_ACGTAAA_TCAGATG	Thomasclavelia ramosa	GCF_016027135.1	99.19	refseq	FMT-1	Pretreatment
TTGAACG_TCTATTG_TTCGGAC	Thomasclavelia ramosa	GCF_016027135.1	99.19	refseq	FMT-1	Pretreatment
GTATCTT_GTTCATT_GCATGAT	Thomasclavelia ramosa	GCF_016027135.1	99.19	refseq	FMT-1	Pretreatment
TAGCCGG_GACTGTC_CGTAGCG	Blautia coccoides	GCF_034355335.1	99.19	refseq	FMT-1	Pretreatment
TCACGAA_TGAGGGA_TAGACCA	Thomasclavelia ramosa	GCF_014131695.1	99.19	refseq	FMT-1	Pretreatment
TGTGTTT_CACTCCA_ACTGAGT	Thomasclavelia ramosa	GCF_016728785.1	99.19	refseq	FMT-1	Pretreatment
TGCTGCT_TGAGCCG_TTGCCGT	Thomasclavelia ramosa	GCF_016728785.1	99.19	refseq	FMT-1	Pretreatment
TCACGAA_CGCGGTA_CGGAGTC	Phocaeicola vulgatus	GCF_020091465.1	99.19	refseq	FMT-1	Pretreatment
GGCAATT_GTAACTG_CACAAAC	Thomasclavelia ramosa	GCF_014131695.1	99.19	refseq	FMT-1	Pretreatment
TCAGGAT_GGTAGTG_GATCTAG	Thomasclavelia ramosa	GCF_016728785.1	99.19	refseq	FMT-1	Pretreatment
TTGCGTC_GCGATCA_TTGCCGT	Thomasclavelia ramosa	GCF_016027135.1	99.19	refseq	FMT-1	Pretreatment
TCACGAA_ACACCGG_CATATGG	Phocaeicola vulgatus	GCF_020091465.1	99.19	refseq	FMT-1	Pretreatment
GTGCAGC_TAAGAGA_TTTGCGC	Thomasclavelia ramosa	GCF_016027135.1	99.19	refseq	FMT-1	Pretreatment
TACACGA_AGTTACG_TCGTAGA	Thomasclavelia ramosa	GCF_014131695.1	99.19	refseq	FMT-1	Pretreatment
TCTCATA_GGGTTGC_GTTGCTT	Thomasclavelia ramosa	GCF_016027135.1	99.19	refseq	FMT-1	Pretreatment
TTTATGC_GACCAAT_ACTACCT	Thomasclavelia ramosa	GCF_016728785.1	99.19	refseq	FMT-1	Pretreatment
TACTTAC_CGGAGCT_GGTAGTG	Thomasclavelia ramosa	GCF_016027135.1	99.19	refseq	FMT-1	Pretreatment
TGTGTTT_CACACCT_CGACTTC	Thomasclavelia ramosa	GCF_016027135.1	99.19	refseq	FMT-1	Pretreatment
GGCAATT_GGAGCAA_CTTGGCT	Thomasclavelia ramosa	GCF_016728785.1	99.19	refseq	FMT-1	Pretreatment
TGCTGCT_AGACATA_AATCTTG	Thomasclavelia ramosa	GCF_016728785.1	99.19	refseq	FMT-1	Pretreatment
TTAGGCA_AGTTACG_CTCCTAG	Thomasclavelia ramosa	GCF_016027135.1	99.19	refseq	FMT-1	Pretreatment
TCAGGAT_TGGCTGG_TTTGCGC	Phocaeicola vulgatus	GCF_024758205.1	99.19	refseq	FMT-1	Pretreatment
TCAGGAT_GTCGTAA_GACGTTA	Thomasclavelia ramosa	GCF_014131695.1	99.19	refseq	FMT-1	Pretreatment
TATCTCA_AAATCCA_GGAACTT	Phocaeicola vulgatus	GCF_020091465.1	99.19	refseq	FMT-1	Pretreatment
TGGCGCA_CGCGGTA_CAGCAGC	Thomasclavelia ramosa	GCF_016027135.1	99.19	refseq	FMT-1	Pretreatment
GTATCTT_ACTGAAC_GACCTGG	Phocaeicola vulgatus	GCF_024758205.1	99.19	refseq	FMT-1	Pretreatment
TCAGGAT_AACCATG_CGTTAGA	Phocaeicola vulgatus	GCF_024758205.1	99.19	refseq	FMT-1	Pretreatment
TCACGAA_AGCTATT_AATCTTG	Thomasclavelia ramosa	GCF_016027135.1	99.19	refseq	FMT-1	Pretreatment
TTTACTG_AGTTACG_TGATTTC	Thomasclavelia ramosa	GCF_016027135.1	99.19	refseq	FMT-1	Pretreatment
TTGAACG_CACACCT_CACAAAC	Thomasclavelia ramosa	GCF_016027135.1	99.19	refseq	FMT-1	Pretreatment
GGTATTG_CAAGTTG_TCGTAGA	Thomasclavelia ramosa	GCF_014131695.1	99.19	refseq	FMT-1	Pretreatment
GTAACGT_CTCAATA_CATAACT	Anaerostipes caccae	GCF_036419175.1	99.19	refseq	FMT-1	Pretreatment
AAACCTG_GTGAAGG_TTCGGAC	Phocaeicola vulgatus	GCF_024022975.1	99.18	refseq	FMT-1	Pretreatment
CAGCTAA_GGAAAGC_CTTGGCT	[Clostridium] innocuum	GCF_012271835.1	99.18	refseq	FMT-1	Pretreatment
AGCGTCG_TTCGAAG_ATTTCTG	Thomasclavelia ramosa	GCF_014131695.1	99.17	refseq	FMT-1	Pretreatment
CCTACAC_GGCCGAT_AAATGAG	Thomasclavelia ramosa	GCF_016027135.1	99.17	refseq	FMT-1	Pretreatment
GATCGAT_GAAACTC_GACCTGG	Phocaeicola vulgatus	GCF_020091465.1	99.17	refseq	FMT-1	Pretreatment
CGTTCTG_TGAGCCG_CAGTAAC	Phocaeicola vulgatus	GCF_020091465.1	99.17	refseq	FMT-1	Pretreatment
AGAGCTT_AGCCTAA_TGGCGCA	Thomasclavelia ramosa	GCF_016027135.1	99.17	refseq	FMT-1	Pretreatment
AGAGCTT_GTTCTCG_TGGGAAG	Thomasclavelia ramosa	GCF_016027135.1	99.17	refseq	FMT-1	Pretreatment
GATCGAT_CTGCCTA_GAAATGA	Phocaeicola vulgatus	GCF_018289355.1	99.17	refseq	FMT-1	Pretreatment
ATCTACT_CGACGTT_ATTCTAC	Phocaeicola vulgatus	GCF_020091465.1	99.17	refseq	FMT-1	Pretreatment
CCTACAC_AAACGTC_AAAGATG	Thomasclavelia ramosa	GCF_014131695.1	99.17	refseq	FMT-1	Pretreatment
ACTTGTT_TCTGAGA_TGAGAGG	Phocaeicola vulgatus	GCF_020091465.1	99.17	refseq	FMT-1	Pretreatment
ACTTGTT_GACTGTC_AGCTCCT	Phocaeicola vulgatus	GCF_024022975.1	99.17	refseq	FMT-1	Pretreatment
GTGCAGC_TGGCTGG_CGCTATC	Phocaeicola vulgatus	GCF_020091465.1	99.17	refseq	FMT-1	Pretreatment
TGCTGCT_AATCGGT_CATAACT	Thomasclavelia ramosa	GCF_016728785.1	99.17	refseq	FMT-1	Pretreatment
TCAGCTC_TTGGAAC_ATTACTC	Thomasclavelia ramosa	GCF_014131695.1	99.17	refseq	FMT-1	Pretreatment
GGACGTC_CGGAGCT_TCCACAC	Thomasclavelia ramosa	GCF_014131695.1	99.17	refseq	FMT-1	Pretreatment
TGTGTTT_ATCATTC_CAGTAAC	Thomasclavelia ramosa	GCF_016027135.1	99.17	refseq	FMT-1	Pretreatment
GACTACA_GCGATCA_TTTGCGC	Phocaeicola vulgatus	GCF_020091465.1	99.16	refseq	FMT-1	Pretreatment
ACTGATG_GCGATCA_TCAACGA	Phocaeicola vulgatus	GCF_020091465.1	99.16	refseq	FMT-1	Pretreatment
CGGAGCT_TTTGCCA_TCTGGAA	Phocaeicola vulgatus	GCF_024758205.1	99.16	refseq	FMT-1	Pretreatment
CACACAA_CACAAGG_TCAACGA	Thomasclavelia ramosa	GCF_016728785.1	99.16	refseq	FMT-1	Pretreatment
CGGAGCT_ACCAAGT_CGATTAT	Thomasclavelia ramosa	GCF_016027135.1	99.16	refseq	FMT-1	Pretreatment
AAACCTG_TAGGCAT_CTCCTAG	Thomasclavelia ramosa	GCF_016728785.1	99.16	refseq	FMT-1	Pretreatment
AAGACCT_AGTTACG_GTGCTTC	Thomasclavelia ramosa	GCF_016728785.1	99.16	refseq	FMT-1	Pretreatment
GAATAAG_GAGTCCG_ACGATAC	Thomasclavelia ramosa	GCF_014131695.1	99.16	refseq	FMT-1	Pretreatment
AGCTCTC_GCGCGAT_TCCACAC	Thomasclavelia ramosa	GCF_016027135.1	99.16	refseq	FMT-1	Pretreatment
CCTACAC_CGACGTT_CGATTAT	Thomasclavelia ramosa	GCF_020097255.1	99.16	refseq	FMT-1	Pretreatment
CGATGGC_CGCGGTA_TTAGGCA	Thomasclavelia ramosa	GCF_016728785.1	99.16	refseq	FMT-1	Pretreatment
CGCTTCA_ATAAGAG_GCTGGGT	Thomasclavelia ramosa	GCF_014131695.1	99.16	refseq	FMT-1	Pretreatment
CTAATGG_CTCCTAG_TGACGGC	Thomasclavelia ramosa	GCF_014131695.1	99.16	refseq	FMT-1	Pretreatment
CGAACAT_CACACCT_AGAATCT	Thomasclavelia ramosa	GCF_014131695.1	99.16	refseq	FMT-1	Pretreatment
CTGCCTA_GAGTCCG_CTAAGAC	Thomasclavelia ramosa	GCF_014131695.1	99.16	refseq	FMT-1	Pretreatment
ACCAGTA_CGTTGGG_TGGCGCA	Phocaeicola vulgatus	GCF_036419465.1	99.16	refseq	FMT-1	Pretreatment
CACATTT_GTGAAGG_TTGCCGT	Thomasclavelia ramosa	GCF_014131695.1	99.16	refseq	FMT-1	Pretreatment
GAGCAGA_AAATCCA_CGACTTC	Thomasclavelia ramosa	GCF_014131695.1	99.16	refseq	FMT-1	Pretreatment
GCTGCAG_TCTGAGA_GATCAGT	Thomasclavelia ramosa	GCF_016027135.1	99.16	refseq	FMT-1	Pretreatment
CAGCTAA_ACTGAAC_GCACTCT	Thomasclavelia ramosa	GCF_014131695.1	99.16	refseq	FMT-1	Pretreatment
GCTGGGT_AACTCAG_TGGGAAG	Thomasclavelia ramosa	GCF_014131695.1	99.16	refseq	FMT-1	Pretreatment
CTCGGAG_TTAGGAC_GCTGCAG	Phocaeicola vulgatus	GCF_018289355.1	99.16	refseq	FMT-1	Pretreatment
GCGCCAA_CTCAATA_AACTCTT	Thomasclavelia ramosa	GCF_016728785.1	99.16	refseq	FMT-1	Pretreatment
CCTACAC_CGCGGTA_TCTGGAA	Thomasclavelia ramosa	GCF_014131695.1	99.16	refseq	FMT-1	Pretreatment
AGAGCTT_CACACCT_GCATGAT	Thomasclavelia ramosa	GCF_014131695.1	99.16	refseq	FMT-1	Pretreatment
GCATGCG_TATCTCA_TGGGAAG	Thomasclavelia ramosa	GCF_014131695.1	99.16	refseq	FMT-1	Pretreatment
GCTCTGT_GCGATCA_ATCCGAA	Thomasclavelia ramosa	GCF_014131695.1	99.16	refseq	FMT-1	Pretreatment
CTAGCCT_CGAATGT_GGAGCAA	Thomasclavelia ramosa	GCF_016027135.1	99.16	refseq	FMT-1	Pretreatment
GCAAACT_CACTCCA_ATTCTAC	Phocaeicola vulgatus	GCF_018289355.1	99.16	refseq	FMT-1	Pretreatment
CTCTACG_CAGGTGC_CGGAGTC	Thomasclavelia ramosa	GCF_016027135.1	99.16	refseq	FMT-1	Pretreatment
AACGTTG_AAACGTC_AGCGGTC	Thomasclavelia ramosa	GCF_016728785.1	99.16	refseq	FMT-1	Pretreatment
CGCTTCA_ACGGGTC_TGAGAGG	Phocaeicola vulgatus	GCF_024758205.1	99.16	refseq	FMT-1	Pretreatment
CGTTCTG_TCTGAGA_ATAAGGG	Thomasclavelia ramosa	GCF_016027135.1	99.16	refseq	FMT-1	Pretreatment
CAAGAAA_CACAAGG_TGATTTC	Phocaeicola vulgatus	GCF_024758205.1	99.16	refseq	FMT-1	Pretreatment
CGCTTCA_CTGCCTA_AGAATCT	Phocaeicola vulgatus	GCF_020885855.1	99.16	refseq	FMT-1	Pretreatment
CAAGAAA_TATCTCA_ACCGTAA	Thomasclavelia ramosa	GCF_016728785.1	99.16	refseq	FMT-1	Pretreatment
GCGCCAA_AGACATA_TCAACGA	Thomasclavelia ramosa	GCF_014131695.1	99.16	refseq	FMT-1	Pretreatment
CTTAGGA_AGCTATT_CATATGG	Blautia coccoides	GCF_034355335.1	99.16	refseq	FMT-1	Pretreatment
ATGTGTG_TGACTTT_TAGACCA	Thomasclavelia ramosa	GCF_016027135.1	99.16	refseq	FMT-1	Pretreatment
GCTGGGT_GAGTCCG_CTCGAAA	Thomasclavelia ramosa	GCF_020097255.1	99.16	refseq	FMT-1	Pretreatment
CCTACAC_AACCATG_ATCCGAA	Blautia coccoides	GCF_034355335.1	99.16	refseq	FMT-1	Pretreatment
CCTACAC_TGCTTGC_TGATTTC	Thomasclavelia ramosa	GCF_016027135.1	99.16	refseq	FMT-1	Pretreatment
GCTGGGT_GATCGTA_TGATTTC	Phocaeicola vulgatus	GCF_024758205.1	99.16	refseq	FMT-1	Pretreatment
CTCTACG_TCAGATG_AAACAAC	Blautia coccoides	GCF_034355335.1	99.16	refseq	FMT-1	Pretreatment
ACGCCGA_AGGTGTA_GCGGGTT	Phocaeicola vulgatus	GCF_024758205.1	99.16	refseq	FMT-1	Pretreatment
GCTGGGT_TTTGCCA_ACTGAGT	Thomasclavelia ramosa	GCF_014131695.1	99.16	refseq	FMT-1	Pretreatment
CGAGAAG_CGAATGT_AGCTCCT	Blautia coccoides	GCF_034355335.1	99.16	refseq	FMT-1	Pretreatment
CAGCAGC_GTATAAG_CGTAGCG	Thomasclavelia ramosa	GCF_014131695.1	99.16	refseq	FMT-1	Pretreatment
GCTCTGT_TGAGCCG_CACACTC	Thomasclavelia ramosa	GCF_020097255.1	99.16	refseq	FMT-1	Pretreatment
AGGGTGA_ACGAGGA_AAATGAG	Thomasclavelia ramosa	GCF_016728785.1	99.16	refseq	FMT-1	Pretreatment
ACCAGTA_TCACGAA_TAAGCGT	Thomasclavelia ramosa	GCF_014131695.1	99.16	refseq	FMT-1	Pretreatment
ACTTTCA_TTGGAAC_CGTAGCG	Thomasclavelia ramosa	GCF_014131695.1	99.16	refseq	FMT-1	Pretreatment
TCGTAGA_CTGCCTA_CGCGTTT	Thomasclavelia ramosa	GCF_016027135.1	99.16	refseq	FMT-1	Pretreatment
GTGTTAG_GTATAAG_TAAGCGT	Thomasclavelia ramosa	GCF_020097255.1	99.16	refseq	FMT-1	Pretreatment
GTGCAGC_TATCTCA_CATATGG	Phocaeicola vulgatus	GCF_024758205.1	99.16	refseq	FMT-1	Pretreatment
GGAAAGC_GTGCGGT_GCATGAT	Phocaeicola vulgatus	GCF_020091465.1	99.16	refseq	FMT-1	Pretreatment
GTATCTT_TTCTCAA_TTGCCGT	Thomasclavelia ramosa	GCF_016728785.1	99.16	refseq	FMT-1	Pretreatment
GTATCTT_CACTCCA_AGCTCCT	Thomasclavelia ramosa	GCF_016027135.1	99.16	refseq	FMT-1	Pretreatment
TTGCGTC_GATCGTA_GCTGGGT	Thomasclavelia ramosa	GCF_014131695.1	99.16	refseq	FMT-1	Pretreatment
GGTATTG_AGCGTCG_CACAAAC	Phocaeicola vulgatus	GCF_024758205.1	99.16	refseq	FMT-1	Pretreatment
GGCAATT_GAAACTC_GAACCTA	Blautia coccoides	GCF_034355335.1	99.16	refseq	FMT-1	Pretreatment
GGCAATT_CGGTTAA_TTTGCGC	Thomasclavelia ramosa	GCF_016027135.1	99.16	refseq	FMT-1	Pretreatment
TAGCCGG_GACGTGC_CAGCAGC	Blautia coccoides	GCF_034355335.1	99.16	refseq	FMT-1	Pretreatment
TCAGGAT_GGCCGAT_ACGCAGC	Thomasclavelia ramosa	GCF_014131695.1	99.16	refseq	FMT-1	Pretreatment
GGTATTG_GAATGAA_TCTGGAA	Thomasclavelia ramosa	GCF_014131695.1	99.16	refseq	FMT-1	Pretreatment
GTGGGTC_GATCGTA_GGGCTAA	Phocaeicola vulgatus	GCF_036419465.1	99.16	refseq	FMT-1	Pretreatment
GGCAATT_TACTTGT_CGGAGTC	Thomasclavelia ramosa	GCF_016027135.1	99.16	refseq	FMT-1	Pretreatment
GTATCTT_CGATGTA_GAAATGA	Thomasclavelia ramosa	GCF_016027135.1	99.16	refseq	FMT-1	Pretreatment
TCAGGAT_GGTAGTG_AGGGCTT	Thomasclavelia ramosa	GCF_020097255.1	99.16	refseq	FMT-1	Pretreatment
TGCCAAA_CATTCGC_CACACTC	Thomasclavelia ramosa	GCF_014131695.1	99.16	refseq	FMT-1	Pretreatment
TTGAACG_GGAAAGC_TGACGGC	Thomasclavelia ramosa	GCF_014131695.1	99.16	refseq	FMT-1	Pretreatment
GGAAAGC_CGAATGT_ACTGAGT	Thomasclavelia ramosa	GCF_016027135.1	99.16	refseq	FMT-1	Pretreatment
TACGGGC_TGTACCT_TGATTTC	Thomasclavelia ramosa	GCF_014131695.1	99.16	refseq	FMT-1	Pretreatment
GTTCATT_AATCGGT_CTGAAAC	Thomasclavelia ramosa	GCF_016728785.1	99.16	refseq	FMT-1	Pretreatment
GGCTCGA_CACACCT_TGACGGC	Thomasclavelia ramosa	GCF_016728785.1	99.16	refseq	FMT-1	Pretreatment
GTGCAGC_GGGCACT_CATAACT	Thomasclavelia ramosa	GCF_016728785.1	99.16	refseq	FMT-1	Pretreatment
CTCTACG_TCTGAGA_GTTGCTT	Thomasclavelia ramosa	GCF_016027135.1	99.15	refseq	FMT-1	Pretreatment
GCTCTGT_TTCGAAG_GGGTTGC	Thomasclavelia ramosa	GCF_016027135.1	99.15	refseq	FMT-1	Pretreatment
GAGCAGA_CACTCCA_ATTCTAC	Thomasclavelia ramosa	GCF_014131695.1	99.15	refseq	FMT-1	Pretreatment
ACTTGTT_CATTCGC_CTCCTAG	Thomasclavelia ramosa	GCF_014131695.1	99.15	refseq	FMT-1	Pretreatment
CTTAGGA_AAATCCA_GCATGAT	Thomasclavelia ramosa	GCF_016027135.1	99.15	refseq	FMT-1	Pretreatment
CGGAGCT_TCTATTG_CTCGAAA	Thomasclavelia ramosa	GCF_014131695.1	99.15	refseq	FMT-1	Pretreatment
CGGAGCT_GATCGTA_GGCGACT	Thomasclavelia ramosa	GCF_014131695.1	99.15	refseq	FMT-1	Pretreatment
AGGCCAC_TCGTCTT_TTGGCAA	Thomasclavelia ramosa	GCF_016027135.1	99.15	refseq	FMT-1	Pretreatment
ATTCTAC_ACCAAGT_GGAGCAA	Thomasclavelia ramosa	GCF_014131695.1	99.15	refseq	FMT-1	Pretreatment
ACGCCGA_ACTTTCA_GCTGCAG	Thomasclavelia ramosa	GCF_014131695.1	99.15	refseq	FMT-1	Pretreatment
CTGCCTA_CGACGTT_GGCGACT	Thomasclavelia ramosa	GCF_014131695.1	99.15	refseq	FMT-1	Pretreatment
ACGCCGA_GTGCGGT_CGATTAT	Thomasclavelia ramosa	GCF_014131695.1	99.15	refseq	FMT-1	Pretreatment
TGCTGCT_ATTGGAC_GCACTCT	Thomasclavelia ramosa	GCF_016027135.1	99.15	refseq	FMT-1	Pretreatment
TTGCGTC_TTAGGAC_TGACGGC	Thomasclavelia ramosa	GCF_014131695.1	99.15	refseq	FMT-1	Pretreatment
TCGGGAC_CGGAGCT_GTGCTTC	Thomasclavelia ramosa	GCF_016027135.1	99.15	refseq	FMT-1	Pretreatment
GGCAATT_GGGCACT_ATAAGGG	Thomasclavelia ramosa	GCF_016728785.1	99.15	refseq	FMT-1	Pretreatment
TTTATGC_TACTTGT_TTTGCGC	Thomasclavelia ramosa	GCF_014131695.1	99.15	refseq	FMT-1	Pretreatment
CTTCTCT_GTAACTG_GCTGGGT	Anaerotruncus colihominis	GCF_023008305.1	99.14	refseq	FMT-1	Pretreatment
AAGGTTC_TGGCTGG_ACCGTAA	Thomasclavelia ramosa	GCF_016027135.1	99.14	refseq	FMT-1	Pretreatment
CTTAGGA_AGACATA_CTAAGAC	Thomasclavelia ramosa	GCF_016728785.1	99.14	refseq	FMT-1	Pretreatment
CGCTTCA_GTATAAG_GTATCTT	Thomasclavelia ramosa	GCF_014131695.1	99.14	refseq	FMT-1	Pretreatment
CAGCTAA_CGACGTT_CACACTC	Blautia coccoides	GCF_034355335.1	99.14	refseq	FMT-1	Pretreatment
CAGCTAA_ACGGGTC_ACGATAC	Thomasclavelia ramosa	GCF_016728785.1	99.14	refseq	FMT-1	Pretreatment
GCTGCAG_ACACCGG_TGGCGCA	Thomasclavelia ramosa	GCF_014131695.1	99.14	refseq	FMT-1	Pretreatment
ATCACGA_GACTGTC_TGGACGC	Thomasclavelia ramosa	GCF_016728785.1	99.14	refseq	FMT-1	Pretreatment
CTAAGAC_TAAGAGA_TTGCCGT	Phocaeicola vulgatus	GCF_020091465.1	99.14	refseq	FMT-1	Pretreatment
GAATAAG_AAATCCA_TGGGAAG	Thomasclavelia ramosa	GCF_016027135.1	99.14	refseq	FMT-1	Pretreatment
GCTGCAG_TCAGATG_TCCACAC	Phocaeicola vulgatus	GCF_020091465.1	99.14	refseq	FMT-1	Pretreatment
GAGCAGA_GGGTTGC_CATATGG	Phocaeicola vulgatus	GCF_024758205.1	99.14	refseq	FMT-1	Pretreatment
ACGATAC_CACCTTA_TTCGGAC	Thomasclavelia ramosa	GCF_020097255.1	99.14	refseq	FMT-1	Pretreatment
AACCGCG_AACCATG_GGTAGTG	Thomasclavelia ramosa	GCF_016728785.1	99.14	refseq	FMT-1	Pretreatment
CACACAA_CGACGTT_CATAACT	Thomasclavelia ramosa	GCF_016728785.1	99.14	refseq	FMT-1	Pretreatment
CGATGGC_GTAACTG_CAGTAAC	Phocaeicola vulgatus	GCF_018289355.1	99.14	refseq	FMT-1	Pretreatment
CGTAGCG_CAGATCA_AGCGGTC	Blautia coccoides	GCF_034355335.1	99.14	refseq	FMT-1	Pretreatment
AAACCTG_AGCTATT_GAACCTA	Phocaeicola vulgatus	GCF_024022975.1	99.14	refseq	FMT-1	Pretreatment
CTTAGGA_CTCAATA_GAAATGA	Thomasclavelia ramosa	GCF_016027135.1	99.14	refseq	FMT-1	Pretreatment
CACATTT_AGGTGTA_AAAGATG	Mediterraneibacter gnavus	GCF_025152275.1	99.14	refseq	FMT-1	Pretreatment
GACCTGG_AAGACCT_TAAGCGT	Thomasclavelia ramosa	GCF_016027135.1	99.14	refseq	FMT-1	Pretreatment
AACGTTG_CGACGTT_CGACTTC	Thomasclavelia ramosa	GCF_016728785.1	99.14	refseq	FMT-1	Pretreatment
GCAGCCA_GTAACTG_TACAGTG	Thomasclavelia ramosa	GCF_014131695.1	99.14	refseq	FMT-1	Pretreatment
ACCAGTA_GTGAAGG_AGAAAGG	Phocaeicola vulgatus	GCF_020091465.1	99.14	refseq	FMT-1	Pretreatment
AACGTTG_TTCTCAA_ACACTGA	Thomasclavelia ramosa	GCF_016728785.1	99.14	refseq	FMT-1	Pretreatment
CTTAGGA_CGGAGCT_AGGAGGT	Thomasclavelia ramosa	GCF_014131695.1	99.14	refseq	FMT-1	Pretreatment
CAGTCCT_TGACTTT_GACCTGG	Thomasclavelia ramosa	GCF_016728785.1	99.14	refseq	FMT-1	Pretreatment
CTGCCTA_ACGTAAA_GATCAGT	Thomasclavelia ramosa	GCF_016027135.1	99.14	refseq	FMT-1	Pretreatment
GCTGGGT_CTGCCTA_GCTGGGT	Blautia coccoides	GCF_034355335.1	99.14	refseq	FMT-1	Pretreatment
CACACAA_CGACGTT_CAGTAAC	Thomasclavelia ramosa	GCF_014131695.1	99.14	refseq	FMT-1	Pretreatment
CAGCAGC_TGACTTT_CGTTAGA	Thomasclavelia ramosa	GCF_016027135.1	99.14	refseq	FMT-1	Pretreatment
GACTACA_GACCAAT_AAGGTTC	Thomasclavelia ramosa	GCF_016728785.1	99.14	refseq	FMT-1	Pretreatment
ATCACGA_ACTGAAC_AGCGGTC	Thomasclavelia ramosa	GCF_014131695.1	99.14	refseq	FMT-1	Pretreatment
GCTGCAG_AAGACCT_AAGGTTC	Thomasclavelia ramosa	GCF_016027135.1	99.14	refseq	FMT-1	Pretreatment
GCAGCCA_TGCTTGC_GGCGACT	Thomasclavelia ramosa	GCF_016027135.1	99.14	refseq	FMT-1	Pretreatment
CCTACAC_CTCTACG_CATATGG	Thomasclavelia ramosa	GCF_016728785.1	99.14	refseq	FMT-1	Pretreatment
GCTGCAG_GCCTCTA_GCCAAAT	Thomasclavelia ramosa	GCF_014131695.1	99.14	refseq	FMT-1	Pretreatment
ACCGTAA_GGGTTGC_CTCCTAG	Thomasclavelia ramosa	GCF_014131695.1	99.14	refseq	FMT-1	Pretreatment
GCTGGGT_AGACATA_TGGCGCA	Phocaeicola vulgatus	GCF_024758205.1	99.14	refseq	FMT-1	Pretreatment
CGCTTCA_CAAGTTG_CGCTATC	Thomasclavelia ramosa	GCF_016027135.1	99.14	refseq	FMT-1	Pretreatment
CAGTCCT_GCCTCTA_TGGACGC	Phocaeicola vulgatus	GCF_018289355.1	99.14	refseq	FMT-1	Pretreatment
GCTGCAG_CGATGTA_GATCAGT	Thomasclavelia ramosa	GCF_014131695.1	99.14	refseq	FMT-1	Pretreatment
GACCTGG_CGACGTT_CAGCAGC	Thomasclavelia ramosa	GCF_014131695.1	99.14	refseq	FMT-1	Pretreatment
ATCTACT_CGCGGTA_CTCACAC	Thomasclavelia ramosa	GCF_014131695.1	99.14	refseq	FMT-1	Pretreatment
ACCAGTA_AACTCAG_GGATGTT	Thomasclavelia ramosa	GCF_014131695.1	99.14	refseq	FMT-1	Pretreatment
ACTGATG_GACGTGC_CACACTC	Thomasclavelia ramosa	GCF_014131695.1	99.14	refseq	FMT-1	Pretreatment
ACCAGTA_TGAGGGA_CATTCGC	Thomasclavelia ramosa	GCF_016728785.1	99.14	refseq	FMT-1	Pretreatment
CGTGAGC_GCGCGAT_CAGCAGC	Thomasclavelia ramosa	GCF_014131695.1	99.14	refseq	FMT-1	Pretreatment
CGAGAAG_ACGTAAA_TCTGGAA	Thomasclavelia ramosa	GCF_020097255.1	99.14	refseq	FMT-1	Pretreatment
ATGTGTG_CGGTTAA_GAACCTA	Thomasclavelia ramosa	GCF_016027135.1	99.14	refseq	FMT-1	Pretreatment
AACGTTG_ACTGAAC_AGAAAGG	Thomasclavelia ramosa	GCF_016728785.1	99.14	refseq	FMT-1	Pretreatment
CAGCAGC_TTCGAAG_CATTCGC	Thomasclavelia ramosa	GCF_014131695.1	99.14	refseq	FMT-1	Pretreatment
ACGATAC_ATCATTC_TCAACGA	Thomasclavelia ramosa	GCF_016027135.1	99.14	refseq	FMT-1	Pretreatment
ATCTACT_ATTGGAC_CGGAGTC	Thomasclavelia ramosa	GCF_016728785.1	99.14	refseq	FMT-1	Pretreatment
TGGCGCA_GCTGCTT_AAATGAG	Blautia coccoides	GCF_034355335.1	99.14	refseq	FMT-1	Pretreatment
TACTTAC_GCCTCTA_TCGAGGC	Thomasclavelia ramosa	GCF_016027135.1	99.14	refseq	FMT-1	Pretreatment
TGCCAAA_ACGGGTC_CTCGAAA	Thomasclavelia ramosa	GCF_016728785.1	99.14	refseq	FMT-1	Pretreatment
TGCCAAA_ACAACAC_CGTTAGA	Phocaeicola vulgatus	GCF_020091465.1	99.14	refseq	FMT-1	Pretreatment
TGCTGCT_CGACGTT_GCCAAAT	Thomasclavelia ramosa	GCF_014131695.1	99.14	refseq	FMT-1	Pretreatment
TTTACTG_GTTCTCG_ACACTGA	Phocaeicola vulgatus	GCF_020885775.1	99.14	refseq	FMT-1	Pretreatment
TCACGAA_GTATAAG_CATATGG	[Clostridium] innocuum	GCF_022845735.1	99.14	refseq	FMT-1	Pretreatment
GTTCATT_GAGTCCG_TCAGATG	Thomasclavelia ramosa	GCF_014131695.1	99.14	refseq	FMT-1	Pretreatment
TCACGAA_GATCGTA_CTAAGAC	Thomasclavelia ramosa	GCF_014131695.1	99.14	refseq	FMT-1	Pretreatment
TCTTCGG_CGTTGGG_AAAGATG	Thomasclavelia ramosa	GCF_016027135.1	99.14	refseq	FMT-1	Pretreatment
TTGCGTC_TTGACTC_GATCTAG	Thomasclavelia ramosa	GCF_014131695.1	99.14	refseq	FMT-1	Pretreatment
TTGCGTC_TTAGGAC_TCTGGAA	Phocaeicola vulgatus	GCF_024758205.1	99.14	refseq	FMT-1	Pretreatment
TGCTGCT_GTCGTAA_ATCCGAA	Thomasclavelia ramosa	GCF_016728785.1	99.14	refseq	FMT-1	Pretreatment
TGGCGCA_ACGCAGA_GTTGCTT	Thomasclavelia ramosa	GCF_016027135.1	99.14	refseq	FMT-1	Pretreatment
GTGCAGC_ATGTGTG_GAAATGA	Phocaeicola vulgatus	GCF_020091465.1	99.14	refseq	FMT-1	Pretreatment
GTATCTT_TGAGCCG_TGATTTC	Thomasclavelia ramosa	GCF_014131695.1	99.14	refseq	FMT-1	Pretreatment
GTGCAGC_CGGAGCT_TGGGAAG	Thomasclavelia ramosa	GCF_016728785.1	99.14	refseq	FMT-1	Pretreatment
TCAGGAT_GCCTCTA_AGCGGTC	Phocaeicola vulgatus	GCF_020091465.1	99.14	refseq	FMT-1	Pretreatment
TGCTGCT_GTGCGGT_CTCGAAA	Blautia coccoides	GCF_034355335.1	99.14	refseq	FMT-1	Pretreatment
TTAGGCA_CGGTTAA_TCCACAC	Phocaeicola vulgatus	GCF_020091465.1	99.14	refseq	FMT-1	Pretreatment
TTGAACG_CGACGTT_CTCCTAG	Blautia coccoides	GCF_034355335.1	99.14	refseq	FMT-1	Pretreatment
TAGCCGG_GTATAAG_AAATGAG	Thomasclavelia ramosa	GCF_016728785.1	99.14	refseq	FMT-1	Pretreatment
GTGGGTC_GACCAAT_CTGAAAC	Phocaeicola vulgatus	GCF_024758205.1	99.14	refseq	FMT-1	Pretreatment
TCACGAA_GACGTGC_GTGTGCG	Blautia coccoides	GCF_034355335.1	99.14	refseq	FMT-1	Pretreatment
GGAAAGC_TTCTCAA_TCCACAC	Thomasclavelia ramosa	GCF_016027135.1	99.14	refseq	FMT-1	Pretreatment
GGCTCGA_GTATAAG_GTATCTT	Thomasclavelia ramosa	GCF_014131695.1	99.14	refseq	FMT-1	Pretreatment
GGACGTC_TAAGAGA_AGTGGGA	Thomasclavelia ramosa	GCF_014131695.1	99.14	refseq	FMT-1	Pretreatment
TAGCCGG_CGTTGGG_AGTGGGA	Thomasclavelia ramosa	GCF_014131695.1	99.14	refseq	FMT-1	Pretreatment
TTGAACG_GCATACA_AAGGTTC	Phocaeicola vulgatus	GCF_018289355.1	99.14	refseq	FMT-1	Pretreatment
TTGCGTC_CGTGTCT_GCGGGTT	Blautia coccoides	GCF_034355335.1	99.14	refseq	FMT-1	Pretreatment
TTTATGC_GGGCACT_GACGTTA	Thomasclavelia ramosa	GCF_016027135.1	99.14	refseq	FMT-1	Pretreatment
ATTCTAC_TACTTGT_AGGGCTT	Thomasclavelia ramosa	GCF_014131695.1	99.13	refseq	FMT-1	Pretreatment
ACTTTCA_GGGTTGC_TAAGCGT	Thomasclavelia ramosa	GCF_016728785.1	99.13	refseq	FMT-1	Pretreatment
AGAGCTT_TTTGCCA_TCGTAGA	Thomasclavelia ramosa	GCF_016027135.1	99.13	refseq	FMT-1	Pretreatment
GCGCCAA_GATCGTA_AAAGATG	Thomasclavelia ramosa	GCF_014131695.1	99.13	refseq	FMT-1	Pretreatment
CCTACAC_GTTCATT_ATAAGGG	Thomasclavelia ramosa	GCF_014131695.1	99.13	refseq	FMT-1	Pretreatment
GGTATTG_TCGTCTT_GCGGGTT	Mediterraneibacter gnavus	GCF_030167985.1	99.13	refseq	FMT-1	Pretreatment
TCACGAA_TTGACTC_AAAGATG	Thomasclavelia ramosa	GCF_014131695.1	99.13	refseq	FMT-1	Pretreatment
TATCTCA_GGCCGAT_CATATGG	[Clostridium] innocuum	GCF_012271835.1	99.13	refseq	FMT-1	Pretreatment
TACGGGC_GGCCGAT_CTTGGCT	Thomasclavelia ramosa	GCF_016728785.1	99.13	refseq	FMT-1	Pretreatment
GTGGGTC_TTAGGAC_TCAGATG	Thomasclavelia ramosa	GCF_016027135.1	99.13	refseq	FMT-1	Pretreatment
TCGTAGA_CACAAGG_CGCTATC	Thomasclavelia ramosa	GCF_016027135.1	99.13	refseq	FMT-1	Pretreatment
GTATCTT_ACGAGGA_TTGGCAA	[Clostridium] innocuum	GCF_022845735.1	99.13	refseq	FMT-1	Pretreatment
TTCGGTC_AAGACCT_GATCTAG	Thomasclavelia ramosa	GCF_014131695.1	99.13	refseq	FMT-1	Pretreatment
TACACGA_GGAGCAA_GGGCTAA	Thomasclavelia ramosa	GCF_014131695.1	99.13	refseq	FMT-1	Pretreatment
CTTAGGA_TCAGATG_GAACCTA	[Clostridium] innocuum	GCF_022845735.1	99.11	refseq	FMT-1	Pretreatment
CAGAGAG_GCATACA_CAGCAGC	Thomasclavelia ramosa	GCF_016728785.1	99.11	refseq	FMT-1	Pretreatment
CTTCTCT_CGAATGT_AGCTCCT	Thomasclavelia ramosa	GCF_016027135.1	99.11	refseq	FMT-1	Pretreatment
CTTCTCT_GTCGTAA_GCGCAAC	Thomasclavelia ramosa	GCF_016027135.1	99.11	refseq	FMT-1	Pretreatment
ATCACGA_AACTCAG_CGCTATC	Blautia coccoides	GCF_034355335.1	99.11	refseq	FMT-1	Pretreatment
CGGAGCT_CGAATGT_GCGGGTT	Blautia coccoides	GCF_034355335.1	99.11	refseq	FMT-1	Pretreatment
AAGACCT_ACCAAGT_GCCAAAT	Phocaeicola vulgatus	GCF_008728395.1	99.11	refseq	FMT-1	Pretreatment
AGGGTGA_GACTGTC_GGGTTGC	Thomasclavelia ramosa	GCF_016728785.1	99.11	refseq	FMT-1	Pretreatment
CTAGCCT_TTGGAAC_GACGTTA	Phocaeicola vulgatus	GCF_020091465.1	99.11	refseq	FMT-1	Pretreatment
TTGCGTC_GAGTCCG_GCATGAT	Clostridium perfringens	GCF_037511265.1	99.11	refseq	FMT-1	Pretreatment
TCAGCTC_GCGCGAT_TGATTTC	[Clostridium] innocuum	GCF_012271835.1	99.11	refseq	FMT-1	Pretreatment
TCACGAA_CGCGGTA_TCGTAGA	Thomasclavelia ramosa	GCF_020097255.1	99.11	refseq	FMT-1	Pretreatment
GTTCATT_CGATGTA_CTAAGAC	Thomasclavelia ramosa	GCF_016728785.1	99.11	refseq	FMT-1	Pretreatment
TACGGGC_TCACGAA_AAACAAC	Thomasclavelia ramosa	GCF_016728785.1	99.11	refseq	FMT-1	Pretreatment
TATCTCA_CGAATGT_TGGCGCA	Thomasclavelia ramosa	GCF_014131695.1	99.11	refseq	FMT-1	Pretreatment
TGTGTTT_CATATCG_CGACTTC	Phocaeicola vulgatus	GCF_024758205.1	99.11	refseq	FMT-1	Pretreatment
TGCTGCT_ACTGAAC_ACTACCT	Thomasclavelia ramosa	GCF_016027135.1	99.11	refseq	FMT-1	Pretreatment
GTTCATT_GACCAAT_TCAACGA	Thomasclavelia ramosa	GCF_014131695.1	99.11	refseq	FMT-1	Pretreatment
TCGGGAC_CACAAGG_GTATCTT	Thomasclavelia ramosa	GCF_016728785.1	99.11	refseq	FMT-1	Pretreatment
TATCTCA_CTCACAC_TGATTTC	[Clostridium] innocuum	GCF_012271835.1	99.11	refseq	FMT-1	Pretreatment
GGACGTC_CAGATCA_GGTAGTG	Thomasclavelia ramosa	GCF_016027135.1	99.11	refseq	FMT-1	Pretreatment
GGACGTC_CATATCG_ATTCTAC	Thomasclavelia ramosa	GCF_014131695.1	99.11	refseq	FMT-1	Pretreatment
GCTGGGT_ACTTTCA_AGTGGGA	Thomasclavelia ramosa	GCF_016728785.1	99.1	refseq	FMT-1	Pretreatment
AGAGCTT_TAGGCAT_TCGTAGA	Thomasclavelia ramosa	GCF_016027135.1	99.1	refseq	FMT-1	Pretreatment
GCAAACT_TTAGGAC_GATCAGT	[Clostridium] innocuum	GCF_012271835.1	99.1	refseq	FMT-1	Pretreatment
AGGCCAC_ATCATTC_ACACTGA	Flavonifractor plautii	GCF_020181555.1	99.1	refseq	FMT-1	Pretreatment
TGTGTTT_ACGGGTC_CACAAAC	Thomasclavelia ramosa	GCF_016728785.1	99.1	refseq	FMT-1	Pretreatment
CTTCTCT_AGCTATT_GTGCTTC	Phocaeicola vulgatus	GCF_024758205.1	99.09	refseq	FMT-1	Pretreatment
ACGATAC_GACGTGC_CTGAAAC	Thomasclavelia ramosa	GCF_016728785.1	99.09	refseq	FMT-1	Pretreatment
CGAGAAG_AACTCAG_CGATTAT	Thomasclavelia ramosa	GCF_016728785.1	99.09	refseq	FMT-1	Pretreatment
CAGTCCT_ATCATTC_TTCGGAC	Phocaeicola vulgatus	GCF_020091465.1	99.09	refseq	FMT-1	Pretreatment
GAGCAGA_GCGCGAT_ATAAGGG	Thomasclavelia ramosa	GCF_020097255.1	99.09	refseq	FMT-1	Pretreatment
CAAGAAA_CGGAGCT_CATATGG	Phocaeicola vulgatus	GCF_020091465.1	99.09	refseq	FMT-1	Pretreatment
GCTGGGT_CTCCTAG_AAGGTTC	Anaerostipes caccae	GCF_036419175.1	99.09	refseq	FMT-1	Pretreatment
CTAGCCT_GGGTTGC_TTTGCGC	Blautia coccoides	GCF_034355335.1	99.09	refseq	FMT-1	Pretreatment
GCATGCG_CTTCTCT_TCAGATG	Anaerostipes caccae	GCF_036419175.1	99.09	refseq	FMT-1	Pretreatment
GATCGAT_GGAAAGC_CGTAGCG	Thomasclavelia ramosa	GCF_014131695.1	99.09	refseq	FMT-1	Pretreatment
CTGCCTA_GGAGCAA_ACTGAGT	Thomasclavelia ramosa	GCF_016027135.1	99.09	refseq	FMT-1	Pretreatment
GCGCCAA_CGTGTCT_GCTGGGT	Blautia coccoides	GCF_034355335.1	99.09	refseq	FMT-1	Pretreatment
CACACAA_TGAGCCG_TAAGCGT	Thomasclavelia ramosa	GCF_014131695.1	99.09	refseq	FMT-1	Pretreatment
CTCGGAG_TCTGAGA_CATTCGC	Blautia coccoides	GCF_034355335.1	99.09	refseq	FMT-1	Pretreatment
CCTACAC_TAGGCAT_CGGAGTC	Thomasclavelia ramosa	GCF_016027135.1	99.09	refseq	FMT-1	Pretreatment
CACATTT_ACGAGGA_TTCGGAC	Thomasclavelia ramosa	GCF_016728785.1	99.09	refseq	FMT-1	Pretreatment
ACTTTCA_GTTCATT_CTGAAAC	Phocaeicola vulgatus	GCF_018289355.1	99.09	refseq	FMT-1	Pretreatment
AGCTCTC_GGCCGAT_GGAGCAA	Thomasclavelia ramosa	GCF_014131695.1	99.09	refseq	FMT-1	Pretreatment
CAAGAAA_CGATGTA_GCTGGGT	Phocaeicola vulgatus	GCF_024758205.1	99.09	refseq	FMT-1	Pretreatment
CGTTCTG_AGGTGTA_CGCTATC	Blautia coccoides	GCF_034355335.1	99.09	refseq	FMT-1	Pretreatment
ATGTGTG_GCATACA_TGGCGCA	Phocaeicola vulgatus	GCF_024758205.1	99.09	refseq	FMT-1	Pretreatment
AGCTCTC_GACCAAT_TAAGCGT	Phocaeicola vulgatus	GCF_024758205.1	99.09	refseq	FMT-1	Pretreatment
ATGTGTG_TCGTCTT_GGGCTAA	Thomasclavelia ramosa	GCF_014131695.1	99.09	refseq	FMT-1	Pretreatment
ACCGTAA_GACTGTC_AGCGGTC	Blautia coccoides	GCF_034355335.1	99.09	refseq	FMT-1	Pretreatment
CACACAA_GGAAAGC_TACAGTG	Thomasclavelia ramosa	GCF_014131695.1	99.09	refseq	FMT-1	Pretreatment
ACCAGTA_CTTCTCT_CGACTTC	Thomasclavelia ramosa	GCF_014131695.1	99.09	refseq	FMT-1	Pretreatment
CTCTACG_GCTGCTT_TTGCCGT	Thomasclavelia ramosa	GCF_014131695.1	99.09	refseq	FMT-1	Pretreatment
GCAGCCA_AACCATG_AAATGAG	Thomasclavelia ramosa	GCF_016728785.1	99.09	refseq	FMT-1	Pretreatment
AGAGCTT_GTGAAGG_AAGGTTC	Phocaeicola vulgatus	GCF_024758205.1	99.09	refseq	FMT-1	Pretreatment
CAGCAGC_AGCTATT_CGACTTC	Thomasclavelia ramosa	GCF_016027135.1	99.09	refseq	FMT-1	Pretreatment
CTGCCTA_AAGACCT_GGTAGTG	Thomasclavelia ramosa	GCF_016027135.1	99.09	refseq	FMT-1	Pretreatment
CAGCTAA_ACTGAAC_TACAGTG	Thomasclavelia ramosa	GCF_016728785.1	99.09	refseq	FMT-1	Pretreatment
CTGCCTA_GTGAAGG_GATCTAG	Thomasclavelia ramosa	GCF_014131695.1	99.09	refseq	FMT-1	Pretreatment
CCTACAC_AATCGGT_TTCGGAC	Blautia coccoides	GCF_034355335.1	99.09	refseq	FMT-1	Pretreatment
CGAGAAG_CGACGTT_ACCGTAA	Blautia coccoides	GCF_034355335.1	99.09	refseq	FMT-1	Pretreatment
GACGTTA_AGTTACG_TCTGGAA	Blautia coccoides	GCF_034355335.1	99.09	refseq	FMT-1	Pretreatment
CGGAGCT_TCTGAGA_TGGCGCA	Blautia coccoides	GCF_034355335.1	99.09	refseq	FMT-1	Pretreatment
CGATGGC_TTGACTC_GCATGAT	Thomasclavelia ramosa	GCF_014131695.1	99.09	refseq	FMT-1	Pretreatment
AAACCTG_TGTACCT_AAGGTTC	Blautia coccoides	GCF_034355335.1	99.09	refseq	FMT-1	Pretreatment
GTTCATT_CTCCTAG_CATAACT	Thomasclavelia ramosa	GCF_016027135.1	99.09	refseq	FMT-1	Pretreatment
GGGCACT_TAGGCAT_GGATGTT	Blautia coccoides	GCF_034355335.1	99.09	refseq	FMT-1	Pretreatment
TGCTGCT_GAATGAA_CACACTC	Thomasclavelia ramosa	GCF_016027135.1	99.09	refseq	FMT-1	Pretreatment
TAGCCGG_GTGAAGG_AGAATCT	Thomasclavelia ramosa	GCF_014131695.1	99.09	refseq	FMT-1	Pretreatment
TGGCGCA_GTAACTG_GCCAAAT	Thomasclavelia ramosa	GCF_016027135.1	99.09	refseq	FMT-1	Pretreatment
TGGCGCA_GCACATA_TGACGGC	Thomasclavelia ramosa	GCF_020097255.1	99.09	refseq	FMT-1	Pretreatment
TCGGGAC_ACTGAAC_GACCTGG	Blautia coccoides	GCF_034355335.1	99.09	refseq	FMT-1	Pretreatment
GGTATTG_GACTGTC_CGATTAT	Thomasclavelia ramosa	GCF_014131695.1	99.09	refseq	FMT-1	Pretreatment
TTGCGTC_ACAACAC_AGGGCTT	Thomasclavelia ramosa	GCF_016728785.1	99.09	refseq	FMT-1	Pretreatment
TCAGCTC_TTAGGAC_TGGACGC	Thomasclavelia ramosa	GCF_016027135.1	99.09	refseq	FMT-1	Pretreatment
GGTATTG_AGCCTAA_GTTGCTT	Thomasclavelia ramosa	GCF_016027135.1	99.09	refseq	FMT-1	Pretreatment
TACTTAC_AGCCTAA_GATCAGT	Thomasclavelia ramosa	GCF_016027135.1	99.09	refseq	FMT-1	Pretreatment
TTGAACG_TGAGCCG_GGATGTT	Phocaeicola vulgatus	GCF_024758205.1	99.09	refseq	FMT-1	Pretreatment
TGCCAAA_TATCTCA_GGTAGTG	Blautia coccoides	GCF_034355335.1	99.09	refseq	FMT-1	Pretreatment
GTGTTAG_GACCAAT_AGAAAGG	Thomasclavelia ramosa	GCF_014131695.1	99.09	refseq	FMT-1	Pretreatment
TCTTCGG_CGTAGCA_TGGCGCA	Phocaeicola vulgatus	GCF_024759565.1	99.09	refseq	FMT-1	Pretreatment
TTCGGTC_GTGCGGT_AAGGTTC	Phocaeicola vulgatus	GCF_024758205.1	99.09	refseq	FMT-1	Pretreatment
TGCCAAA_GCTGCTT_ATTTCTG	Blautia coccoides	GCF_034355335.1	99.09	refseq	FMT-1	Pretreatment
GTTCATT_TCTATTG_CTGCGGA	Thomasclavelia ramosa	GCF_016027135.1	99.09	refseq	FMT-1	Pretreatment
TCTTCGG_CACACCT_AAACAAC	Thomasclavelia ramosa	GCF_016027135.1	99.09	refseq	FMT-1	Pretreatment
TCTCATA_CGATGTA_CGTTAGA	Thomasclavelia ramosa	GCF_014131695.1	99.09	refseq	FMT-1	Pretreatment
TGCTGCT_TCGTCTT_TCAGATG	Thomasclavelia ramosa	GCF_016728785.1	99.09	refseq	FMT-1	Pretreatment
GTATCTT_GTGCGGT_GGCGACT	Anaerostipes caccae	GCF_036419175.1	99.09	refseq	FMT-1	Pretreatment
TAGCCGG_GACCAAT_CATATGG	Thomasclavelia ramosa	GCF_016027135.1	99.09	refseq	FMT-1	Pretreatment
TCGTAGA_CGACGTT_ATTCTAC	Thomasclavelia ramosa	GCF_016728785.1	99.09	refseq	FMT-1	Pretreatment
GTAACGT_TTCGAAG_TTGCCGT	Thomasclavelia ramosa	GCF_016027135.1	99.09	refseq	FMT-1	Pretreatment
GGCAATT_TGACTTT_AGTAGTC	Enterocloster bolteae	GCF_023008325.1	99.09	refseq	FMT-1	Pretreatment
GTATCTT_TTAGGAC_ATTACTC	Thomasclavelia ramosa	GCF_016027135.1	99.09	refseq	FMT-1	Pretreatment
AACGTTG_GACGTGC_ATTACTC	Phocaeicola vulgatus	GCF_024758205.1	99.08	refseq	FMT-1	Pretreatment
CAGCTAA_ATTGGAC_ATCCGAA	Thomasclavelia ramosa	GCF_016027135.1	99.08	refseq	FMT-1	Pretreatment
CAGAGAG_TACTTGT_ATAAGGG	Thomasclavelia ramosa	GCF_016027135.1	99.08	refseq	FMT-1	Pretreatment
GAAATGA_GTTCTCG_ACGCAGC	Thomasclavelia ramosa	GCF_016728785.1	99.08	refseq	FMT-1	Pretreatment
AGGCCAC_AGCGTCG_GGATGTT	Blautia coccoides	GCF_034355335.1	99.08	refseq	FMT-1	Pretreatment
CAAGAAA_GTCGTAA_GCGGGTT	Phocaeicola vulgatus	GCF_020091465.1	99.08	refseq	FMT-1	Pretreatment
ACCAGTA_GACTGTC_GCATGAT	Thomasclavelia ramosa	GCF_016728785.1	99.08	refseq	FMT-1	Pretreatment
ACTGATG_GCATACA_CATAACT	Thomasclavelia ramosa	GCF_016027135.1	99.08	refseq	FMT-1	Pretreatment
AGGGTGA_TAGGCAT_AGTGGGA	Thomasclavelia ramosa	GCF_016728785.1	99.08	refseq	FMT-1	Pretreatment
CTAGCCT_GTATAAG_CATATGG	Phocaeicola vulgatus	GCF_000012825.1	99.08	refseq	FMT-1	Pretreatment
CGGAGCT_AAATCCA_CGATTAT	[Clostridium] innocuum	GCF_012271835.1	99.08	refseq	FMT-1	Pretreatment
CAGAGAG_GTTCTCG_TGGGAAG	Blautia coccoides	GCF_034355335.1	99.08	refseq	FMT-1	Pretreatment
AGCTCTC_CGCGGTA_AAAGATG	Blautia coccoides	GCF_034355335.1	99.08	refseq	FMT-1	Pretreatment
AACCGCG_TTTGCCA_TCCACAC	Thomasclavelia ramosa	GCF_020097255.1	99.08	refseq	FMT-1	Pretreatment
AGCTCTC_ATGTGTG_TAGACCA	Thomasclavelia ramosa	GCF_016027135.1	99.08	refseq	FMT-1	Pretreatment
CTAAGAC_CGATGTA_TCTTCGG	Blautia coccoides	GCF_034355335.1	99.08	refseq	FMT-1	Pretreatment
CTAATGG_CATTCGC_ACGGCCA	Blautia coccoides	GCF_034355335.1	99.08	refseq	FMT-1	Pretreatment
ACCAGTA_CGATGTA_GGAACTT	Blautia coccoides	GCF_034355335.1	99.08	refseq	FMT-1	Pretreatment
ACGATAC_CGGAGCT_TAGACCA	Phocaeicola vulgatus	GCF_020091465.1	99.08	refseq	FMT-1	Pretreatment
AGGGTGA_CGTTGGG_GCGGGTT	Phocaeicola vulgatus	GCF_008728395.1	99.08	refseq	FMT-1	Pretreatment
AGTAGTC_TTTGCCA_AACTCTT	Blautia coccoides	GCF_034355335.1	99.08	refseq	FMT-1	Pretreatment
AAGGTTC_TAGGCAT_ATTCTAC	Thomasclavelia ramosa	GCF_016027135.1	99.08	refseq	FMT-1	Pretreatment
AGGCCAC_CAGGTGC_AGTGGGA	Blautia coccoides	GCF_034355335.1	99.08	refseq	FMT-1	Pretreatment
CTAGCCT_TGAGGGA_CATAACT	Thomasclavelia ramosa	GCF_016027135.1	99.08	refseq	FMT-1	Pretreatment
AGCGTCG_GATCGTA_ACCGTAA	Thomasclavelia ramosa	GCF_016027135.1	99.08	refseq	FMT-1	Pretreatment
TGGCGCA_CGTGTCT_ACGATAC	Thomasclavelia ramosa	GCF_016728785.1	99.08	refseq	FMT-1	Pretreatment
TTTATGC_GGCCGAT_TGATTTC	Thomasclavelia ramosa	GCF_014131695.1	99.08	refseq	FMT-1	Pretreatment
GTGCAGC_CGGTTAA_ATAAGGG	Thomasclavelia ramosa	GCF_014131695.1	99.08	refseq	FMT-1	Pretreatment
TCACGAA_GGCCGAT_TCAACGA	Thomasclavelia ramosa	GCF_016728785.1	99.08	refseq	FMT-1	Pretreatment
TTGCGTC_CGTGTCT_GCTGGGT	Thomasclavelia ramosa	GCF_014131695.1	99.08	refseq	FMT-1	Pretreatment
TCGGGAC_TTAGGAC_TAGACCA	Phocaeicola vulgatus	GCF_024758205.1	99.08	refseq	FMT-1	Pretreatment
TCGGGAC_CGAATGT_GCGGGTT	Blautia coccoides	GCF_034355335.1	99.08	refseq	FMT-1	Pretreatment
TACTTAC_TACTTGT_AGCTCCT	Phocaeicola vulgatus	GCF_024758205.1	99.08	refseq	FMT-1	Pretreatment
TCAGGAT_GTATAAG_CTTGGCT	Thomasclavelia ramosa	GCF_014131695.1	99.08	refseq	FMT-1	Pretreatment
GGCAATT_ACGTAAA_GCTGCAG	Thomasclavelia ramosa	GCF_016027135.1	99.08	refseq	FMT-1	Pretreatment
TGCTGCT_GCTGCTT_TGATTTC	Blautia coccoides	GCF_034355335.1	99.08	refseq	FMT-1	Pretreatment
TCTCATA_GACCAAT_TTTGCGC	Phocaeicola vulgatus	GCF_020091465.1	99.08	refseq	FMT-1	Pretreatment
TACGGGC_GGAGCAA_TACTCAT	Thomasclavelia ramosa	GCF_016728785.1	99.08	refseq	FMT-1	Pretreatment
TTAGGCA_TCGTCTT_GCACTCT	Thomasclavelia ramosa	GCF_014131695.1	99.08	refseq	FMT-1	Pretreatment
AAGACCT_CGTGTCT_CAGTAAC	Thomasclavelia ramosa	GCF_014131695.1	99.07	refseq	FMT-1	Pretreatment
CGCTTCA_GACGTGC_TGGGAAG	Thomasclavelia ramosa	GCF_016027135.1	99.07	refseq	FMT-1	Pretreatment
CGATGGC_ACGGGTC_GTGCTTC	Blautia coccoides	GCF_034355335.1	99.07	refseq	FMT-1	Pretreatment
ACTTTCA_AGTTACG_GGTAGTG	Thomasclavelia ramosa	GCF_014131695.1	99.07	refseq	FMT-1	Pretreatment
CAGAGAG_TGAGGGA_AGTAGTC	Thomasclavelia ramosa	GCF_016027135.1	99.07	refseq	FMT-1	Pretreatment
ACCAGTA_ACGGGTC_AGGGCTT	Thomasclavelia ramosa	GCF_016728785.1	99.07	refseq	FMT-1	Pretreatment
ACTTTCA_CTCTACG_GACGTTA	Phocaeicola vulgatus	GCF_000012825.1	99.07	refseq	FMT-1	Pretreatment
ACTTTCA_AACCATG_CTTGGCT	Thomasclavelia ramosa	GCF_016027135.1	99.07	refseq	FMT-1	Pretreatment
AAGACCT_CTCACAC_CGCTATC	Thomasclavelia ramosa	GCF_014131695.1	99.07	refseq	FMT-1	Pretreatment
GACGTTA_AGACATA_ATCCGAA	Thomasclavelia ramosa	GCF_014131695.1	99.07	refseq	FMT-1	Pretreatment
CGTAGCG_CTTCTCT_ATAAGGG	Blautia coccoides	GCF_034355335.1	99.07	refseq	FMT-1	Pretreatment
CAGAGAG_GTATAAG_CTCGAAA	Blautia coccoides	GCF_034355335.1	99.07	refseq	FMT-1	Pretreatment
CAGCTAA_CGTGTCT_GCGCAAC	Eggerthella lenta	GCF_021378705.1	99.07	refseq	FMT-1	Pretreatment
CGTGAGC_GGAGCAA_CTGAAAC	Thomasclavelia ramosa	GCF_016728785.1	99.07	refseq	FMT-1	Pretreatment
TGCCAAA_GCGATCA_CACAAAC	Blautia producta	GCF_010669205.1	99.07	refseq	FMT-1	Pretreatment
TGCTGCT_TGGCTGG_GTGCTTC	Thomasclavelia ramosa	GCF_014131695.1	99.07	refseq	FMT-1	Pretreatment
GTGGGTC_CACTCCA_TTGCCGT	Blautia coccoides	GCF_034355335.1	99.07	refseq	FMT-1	Pretreatment
GGACGTC_GTTCATT_CAGCAGC	Blautia coccoides	GCF_034355335.1	99.07	refseq	FMT-1	Pretreatment
TGGCGCA_CACAAGG_AGCTCCT	Phocaeicola vulgatus	GCF_024758205.1	99.07	refseq	FMT-1	Pretreatment
TGAGCCG_TGGCTGG_CTCGAAA	Thomasclavelia ramosa	GCF_016728785.1	99.07	refseq	FMT-1	Pretreatment
TATCTCA_AGTTACG_CGACTTC	Thomasclavelia ramosa	GCF_014131695.1	99.07	refseq	FMT-1	Pretreatment
TGCTGCT_TGAGCCG_AGAATCT	[Clostridium] innocuum	GCF_023008265.1	99.07	refseq	FMT-1	Pretreatment
TGCTGCT_AAATCCA_GATCAGT	Thomasclavelia ramosa	GCF_014131695.1	99.07	refseq	FMT-1	Pretreatment
TCGGGAC_TTTGCCA_GCCAAAT	Thomasclavelia ramosa	GCF_014131695.1	99.07	refseq	FMT-1	Pretreatment
TTCGGTC_TCACGAA_TCAACGA	Thomasclavelia ramosa	GCF_020097255.1	99.07	refseq	FMT-1	Pretreatment
GTAACGT_TGGCTGG_ACGATAC	Thomasclavelia ramosa	GCF_014131695.1	99.07	refseq	FMT-1	Pretreatment
GACGTTA_AGGTGTA_ACGCAGC	[Clostridium] innocuum	GCF_023008265.1	99.06	refseq	FMT-1	Pretreatment
TCGGGAC_TCTGAGA_GGGTTGC	[Clostridium] innocuum	GCF_012271835.1	99.06	refseq	FMT-1	Pretreatment
CAGAGAG_GTTCATT_TGGCGCA	Thomasclavelia ramosa	GCF_014131695.1	99.05	refseq	FMT-1	Pretreatment
CAGCAGC_CTTCTCT_AGTGGGA	Thomasclavelia ramosa	GCF_016728785.1	99.05	refseq	FMT-1	Pretreatment
AGCGTCG_TCTATTG_TCTTCGG	Thomasclavelia ramosa	GCF_016728785.1	99.05	refseq	FMT-1	Pretreatment
AAGACCT_TCACGAA_GGGTTGC	Phocaeicola vulgatus	GCF_024759565.1	99.05	refseq	FMT-1	Pretreatment
CGATGGC_CACCTTA_TAAGCGT	Thomasclavelia ramosa	GCF_016728785.1	99.05	refseq	FMT-1	Pretreatment
GAGCAGA_CACACCT_TTGCCGT	Phocaeicola vulgatus	GCF_020091465.1	99.05	refseq	FMT-1	Pretreatment
TAGCCGG_CACTCCA_ATCCGAA	Blautia coccoides	GCF_034355335.1	99.05	refseq	FMT-1	Pretreatment
TTTATGC_TGAGCCG_GGGTTGC	Thomasclavelia ramosa	GCF_014131695.1	99.05	refseq	FMT-1	Pretreatment
TATCTCA_CACAAGG_AAAGATG	Thomasclavelia ramosa	GCF_014131695.1	99.05	refseq	FMT-1	Pretreatment
GGCAATT_AAATCCA_GCATGAT	Thomasclavelia ramosa	GCF_014131695.1	99.05	refseq	FMT-1	Pretreatment
GGCAATT_TCTGAGA_TTCGGAC	Phocaeicola vulgatus	GCF_024758205.1	99.05	refseq	FMT-1	Pretreatment
CCTACAC_ATCATTC_TTTGCGC	Mediterraneibacter gnavus	GCF_016904015.1	99.04	refseq	FMT-1	Pretreatment
GCTGCAG_GCATACA_TTTGCGC	[Clostridium] innocuum	GCF_022845735.1	99.04	refseq	FMT-1	Pretreatment
AGAGCTT_GGAAAGC_AGAAAGG	Blautia coccoides	GCF_034355335.1	99.03	refseq	FMT-1	Pretreatment
ACTGATG_AGCCTAA_CATATGG	Blautia coccoides	GCF_034355335.1	99.03	refseq	FMT-1	Pretreatment
CTAATGG_GAGTCCG_GCGCAAC	Thomasclavelia ramosa	GCF_014131695.1	99.03	refseq	FMT-1	Pretreatment
AGCGTCG_GGTAGTG_AAAGATG	Thomasclavelia ramosa	GCF_016027135.1	99.03	refseq	FMT-1	Pretreatment
GACCTGG_AGACATA_CTGCGGA	Thomasclavelia ramosa	GCF_016027135.1	99.03	refseq	FMT-1	Pretreatment
ACTTTCA_AGACATA_TCTCAGC	Phocaeicola vulgatus	GCF_020885855.1	99.03	refseq	FMT-1	Pretreatment
AAGGTTC_CAGGTGC_GCCAAAT	Blautia coccoides	GCF_034355335.1	99.03	refseq	FMT-1	Pretreatment
AGAGCTT_ACGCAGA_GCACTCT	Thomasclavelia ramosa	GCF_016027135.1	99.03	refseq	FMT-1	Pretreatment
ACGCCGA_CAGATCA_AGTAGTC	Thomasclavelia ramosa	GCF_016027135.1	99.03	refseq	FMT-1	Pretreatment
CGCTTCA_AAGACCT_AAACAAC	Blautia coccoides	GCF_034355335.1	99.03	refseq	FMT-1	Pretreatment
AACCGCG_AGGTGTA_TGGACGC	Eggerthella lenta	GCF_000024265.1	99.03	refseq	FMT-1	Pretreatment
AGGCCAC_CTCAATA_ATCCGAA	Blautia coccoides	GCF_034355335.1	99.03	refseq	FMT-1	Pretreatment
ACTTGTT_CAAGTTG_CGGAGTC	Thomasclavelia ramosa	GCF_020097255.1	99.03	refseq	FMT-1	Pretreatment
ACTTTCA_CGTTGGG_AGCGGTC	Phocaeicola vulgatus	GCF_020091465.1	99.03	refseq	FMT-1	Pretreatment
CAGTCCT_GACTGTC_CATAACT	Phocaeicola vulgatus	GCF_000012825.1	99.03	refseq	FMT-1	Pretreatment
GAAATGA_CGGTTAA_ACGATAC	Thomasclavelia ramosa	GCF_016728785.1	99.03	refseq	FMT-1	Pretreatment
GCTCTGT_ATTGGAC_AGAAAGG	Thomasclavelia ramosa	GCF_016027135.1	99.03	refseq	FMT-1	Pretreatment
AGCTCTC_CTCACAC_CGCGTTT	Thomasclavelia ramosa	GCF_016027135.1	99.03	refseq	FMT-1	Pretreatment
CACACAA_CACAAGG_GTGCTTC	Blautia coccoides	GCF_034355335.1	99.03	refseq	FMT-1	Pretreatment
CTCGGAG_TTAGGAC_GCATGAT	Blautia coccoides	GCF_034355335.1	99.03	refseq	FMT-1	Pretreatment
CTAAGAC_ACTGAAC_TAAGCGT	Thomasclavelia ramosa	GCF_016728785.1	99.03	refseq	FMT-1	Pretreatment
CGTTCTG_GGAAAGC_ACTACCT	Thomasclavelia ramosa	GCF_014131695.1	99.03	refseq	FMT-1	Pretreatment
AGCGTCG_GTAACTG_CTAAGAC	Thomasclavelia ramosa	GCF_016027135.1	99.03	refseq	FMT-1	Pretreatment
ACGATAC_CGTGTCT_AAATGAG	Blautia coccoides	GCF_034355335.1	99.03	refseq	FMT-1	Pretreatment
AAGACCT_ACGTAAA_AAAGATG	Blautia coccoides	GCF_034355335.1	99.03	refseq	FMT-1	Pretreatment
CGTGAGC_CAAGTTG_CGTAGCG	Thomasclavelia ramosa	GCF_020097255.1	99.03	refseq	FMT-1	Pretreatment
CGGAGCT_CGATGTA_GTAATCG	Thomasclavelia ramosa	GCF_016027135.1	99.03	refseq	FMT-1	Pretreatment
GCTGCAG_GTATAAG_GATCAGT	Blautia coccoides	GCF_034355335.1	99.03	refseq	FMT-1	Pretreatment
AGTAGTC_CGTGTCT_GAAATGA	Thomasclavelia ramosa	GCF_016027135.1	99.03	refseq	FMT-1	Pretreatment
CACATTT_AACCATG_ATTTCTG	Phocaeicola vulgatus	GCF_020091465.1	99.03	refseq	FMT-1	Pretreatment
CCTACAC_TTAGGAC_GTTGCTT	Blautia coccoides	GCF_034355335.1	99.03	refseq	FMT-1	Pretreatment
ACCGTAA_GTGCGGT_CACACTC	Thomasclavelia ramosa	GCF_016728785.1	99.03	refseq	FMT-1	Pretreatment
AGGCCAC_GACTGTC_ATAAGGG	Thomasclavelia ramosa	GCF_016027135.1	99.03	refseq	FMT-1	Pretreatment
CACATTT_AGACATA_CTAAGAC	Thomasclavelia ramosa	GCF_016728785.1	99.03	refseq	FMT-1	Pretreatment
GACCTGG_CGTGTCT_AAATGAG	Thomasclavelia ramosa	GCF_014131695.1	99.03	refseq	FMT-1	Pretreatment
CTAAGAC_CTCACAC_CAGTAAC	Phocaeicola vulgatus	GCF_000012825.1	99.03	refseq	FMT-1	Pretreatment
CTTCTCT_GCGCGAT_GCTGCAG	Blautia coccoides	GCF_034355335.1	99.03	refseq	FMT-1	Pretreatment
GACGTTA_GTGAAGG_GCTGCAG	Phocaeicola vulgatus	GCF_020885715.1	99.03	refseq	FMT-1	Pretreatment
CGCTTCA_GTGAAGG_CAGTAAC	Blautia coccoides	GCF_034355335.1	99.03	refseq	FMT-1	Pretreatment
CGATGGC_GTAACTG_AAGGTTC	Thomasclavelia ramosa	GCF_016728785.1	99.03	refseq	FMT-1	Pretreatment
CTTCTCT_CGTGTCT_TCCACAC	Thomasclavelia ramosa	GCF_014131695.1	99.03	refseq	FMT-1	Pretreatment
CTGCCTA_AACCATG_ACGGCCA	Thomasclavelia ramosa	GCF_014131695.1	99.03	refseq	FMT-1	Pretreatment
CACATTT_GGAAAGC_CTCACAC	Blautia coccoides	GCF_034355335.1	99.03	refseq	FMT-1	Pretreatment
CTCTACG_TGTACCT_ACGCAGC	Thomasclavelia ramosa	GCF_014131695.1	99.03	refseq	FMT-1	Pretreatment
ACGCCGA_CGTGTCT_AATCTTG	Thomasclavelia ramosa	GCF_014131695.1	99.03	refseq	FMT-1	Pretreatment
ATCTACT_GCCTCTA_GCTGGGT	Phocaeicola vulgatus	GCF_008728395.1	99.03	refseq	FMT-1	Pretreatment
GCTGGGT_TGTACCT_CGCGTTT	Blautia coccoides	GCF_034355335.1	99.03	refseq	FMT-1	Pretreatment
AGGGTGA_GACGTGC_GTAATCG	Blautia coccoides	GCF_034355335.1	99.03	refseq	FMT-1	Pretreatment
CACATTT_AATCGGT_CGACTTC	Thomasclavelia ramosa	GCF_016027135.1	99.03	refseq	FMT-1	Pretreatment
CAAGAAA_TCGTCTT_AAGGTTC	Thomasclavelia ramosa	GCF_016728785.1	99.03	refseq	FMT-1	Pretreatment
CGATGGC_GACCAAT_CGAACAT	Thomasclavelia ramosa	GCF_014131695.1	99.03	refseq	FMT-1	Pretreatment
CAGCTAA_CATTCGC_GCGCAAC	Phocaeicola vulgatus	GCF_024758205.1	99.03	refseq	FMT-1	Pretreatment
GACCTGG_GTATAAG_CACAAAC	Blautia coccoides	GCF_034355335.1	99.03	refseq	FMT-1	Pretreatment
GCAAACT_TCTATTG_ATTTCTG	Phocaeicola vulgatus	GCF_024758205.1	99.03	refseq	FMT-1	Pretreatment
GACTACA_ACCAAGT_TCTGGAA	[Clostridium] innocuum	GCF_023008265.1	99.03	refseq	FMT-1	Pretreatment
AAGACCT_GGAGCAA_TCTTCGG	Thomasclavelia ramosa	GCF_016027135.1	99.03	refseq	FMT-1	Pretreatment
CTTAGGA_CAGGTGC_GCTGCAG	Thomasclavelia ramosa	GCF_020097255.1	99.03	refseq	FMT-1	Pretreatment
AGTAGTC_ATCATTC_TCTGGAA	Blautia coccoides	GCF_034355335.1	99.03	refseq	FMT-1	Pretreatment
GCGCCAA_TTAGGAC_AAGGTTC	Phocaeicola vulgatus	GCF_020091465.1	99.03	refseq	FMT-1	Pretreatment
GCTCTGT_GGAGCAA_CATATGG	Blautia coccoides	GCF_034355335.1	99.03	refseq	FMT-1	Pretreatment
AACGTTG_GTCGTAA_CAGTAAC	Thomasclavelia ramosa	GCF_014131695.1	99.03	refseq	FMT-1	Pretreatment
GACCTGG_TGACTTT_TGACGGC	Thomasclavelia ramosa	GCF_014131695.1	99.03	refseq	FMT-1	Pretreatment
ACGATAC_CTCTACG_TCTTCGG	Blautia coccoides	GCF_034355335.1	99.03	refseq	FMT-1	Pretreatment
TTAGGCA_GGCCGAT_GGGTTGC	Phocaeicola vulgatus	GCF_024022975.1	99.03	refseq	FMT-1	Pretreatment
TCAGGAT_AATCGGT_CACAAAC	Thomasclavelia ramosa	GCF_014131695.1	99.03	refseq	FMT-1	Pretreatment
TTGCGTC_CTCACAC_GTGCTTC	Phocaeicola vulgatus	GCF_020885855.1	99.03	refseq	FMT-1	Pretreatment
TACTTAC_TCAGATG_AAAGATG	Thomasclavelia ramosa	GCF_016728785.1	99.03	refseq	FMT-1	Pretreatment
TCGTAGA_CGTTGGG_CAGCAGC	Thomasclavelia ramosa	GCF_016027135.1	99.03	refseq	FMT-1	Pretreatment
GTGTTAG_CTCACAC_GTTGCTT	Thomasclavelia ramosa	GCF_016027135.1	99.03	refseq	FMT-1	Pretreatment
TTAGGCA_TCGTCTT_ATAAGGG	Phocaeicola vulgatus	GCF_020091465.1	99.03	refseq	FMT-1	Pretreatment
TGCCAAA_GCGCGAT_TCGTAGA	Phocaeicola vulgatus	GCF_024758205.1	99.03	refseq	FMT-1	Pretreatment
TCACGAA_GCATACA_GGAACTT	Thomasclavelia ramosa	GCF_016027135.1	99.03	refseq	FMT-1	Pretreatment
TCGGGAC_AGTTACG_TGGCGCA	Thomasclavelia ramosa	GCF_016728785.1	99.03	refseq	FMT-1	Pretreatment
GGCTCGA_AACCATG_GACCTGG	Thomasclavelia ramosa	GCF_014131695.1	99.03	refseq	FMT-1	Pretreatment
TCGGGAC_TCGTCTT_TGGACGC	Thomasclavelia ramosa	GCF_014131695.1	99.03	refseq	FMT-1	Pretreatment
TAGCCGG_GTGAAGG_CGCGTTT	Thomasclavelia ramosa	GCF_016027135.1	99.03	refseq	FMT-1	Pretreatment
TCAGCTC_TAGGCAT_GGATGTT	Blautia coccoides	GCF_034355335.1	99.03	refseq	FMT-1	Pretreatment
TGTGTTT_GTATAAG_AGCGGTC	Thomasclavelia ramosa	GCF_020097255.1	99.03	refseq	FMT-1	Pretreatment
GTAACGT_TAGGCAT_ATTACTC	Blautia coccoides	GCF_034355335.1	99.03	refseq	FMT-1	Pretreatment
GGACGTC_GGGCACT_CAGTAAC	Thomasclavelia ramosa	GCF_020097255.1	99.03	refseq	FMT-1	Pretreatment
TGGCGCA_CGCGGTA_GGAACTT	Blautia coccoides	GCF_034355335.1	99.03	refseq	FMT-1	Pretreatment
TTTACTG_GTAACTG_CGGAGTC	Phocaeicola vulgatus	GCF_020091465.1	99.03	refseq	FMT-1	Pretreatment
TAGCCGG_CGATGTA_ACGCAGC	Thomasclavelia ramosa	GCF_014131695.1	99.03	refseq	FMT-1	Pretreatment
TGTGTTT_TTTGCCA_CATATGG	Blautia coccoides	GCF_034355335.1	99.03	refseq	FMT-1	Pretreatment
GTGGGTC_GTGCGGT_TCGTAGA	Blautia coccoides	GCF_034355335.1	99.03	refseq	FMT-1	Pretreatment
TGCTGCT_GTTCATT_TCCACAC	Blautia coccoides	GCF_034355335.1	99.03	refseq	FMT-1	Pretreatment
TTTATGC_GGGTTGC_GACGTTA	Thomasclavelia ramosa	GCF_014131695.1	99.03	refseq	FMT-1	Pretreatment
GGCAATT_CACCTTA_ACCGTAA	Blautia coccoides	GCF_034355335.1	99.03	refseq	FMT-1	Pretreatment
TTCGGTC_AGGTGTA_AGGGCTT	Phocaeicola vulgatus	GCF_020091465.1	99.03	refseq	FMT-1	Pretreatment
TACTTAC_GGAAAGC_AGAAAGG	Blautia coccoides	GCF_034355335.1	99.03	refseq	FMT-1	Pretreatment
GTTCATT_GCGATCA_AATCTTG	Blautia coccoides	GCF_034355335.1	99.03	refseq	FMT-1	Pretreatment
TACTTAC_GCGCGAT_ATTACTC	Thomasclavelia ramosa	GCF_014131695.1	99.03	refseq	FMT-1	Pretreatment
GGCAATT_TCGTCTT_CGTAGCG	Thomasclavelia ramosa	GCF_016728785.1	99.03	refseq	FMT-1	Pretreatment
GGTATTG_GCGCGAT_ATTACTC	Blautia coccoides	GCF_034355335.1	99.03	refseq	FMT-1	Pretreatment
GTTCATT_TCTATTG_CGATTAT	Blautia coccoides	GCF_034355335.1	99.03	refseq	FMT-1	Pretreatment
GGGCACT_GGTAGTG_TCTTCGG	Blautia coccoides	GCF_034355335.1	99.03	refseq	FMT-1	Pretreatment
GACCTGG_GCACATA_GCGGGTT	Mediterraneibacter gnavus	GCF_020181455.1	99.02	refseq	FMT-1	Pretreatment
AGAGCTT_GTATAAG_TGGACGC	[Clostridium] innocuum	GCF_022845735.1	99.02	refseq	FMT-1	Pretreatment
CTCTACG_GCGATCA_TTGGCAA	Mediterraneibacter gnavus	GCF_020181455.1	99.02	refseq	FMT-1	Pretreatment
GCTGCAG_AGACATA_ACGATAC	[Clostridium] innocuum	GCF_022845735.1	99.02	refseq	FMT-1	Pretreatment
CTAAGAC_ATAAGAG_CTCGAAA	[Clostridium] innocuum	GCF_012271835.1	99.02	refseq	FMT-1	Pretreatment
ACCAGTA_GGGTTGC_AACTCTT	Phocaeicola vulgatus	GCF_020091465.1	99.02	refseq	FMT-1	Pretreatment
GTGTTAG_CGATGTA_GCGGGTT	Enterocloster bolteae	GCF_013112035.1	99.02	refseq	FMT-1	Pretreatment
TTTATGC_GATCGTA_CTAAGAC	Thomasclavelia ramosa	GCF_014131695.1	99.02	refseq	FMT-1	Pretreatment
TCGTAGA_CAAGTTG_TCGAGGC	Blautia coccoides	GCF_034355335.1	99.02	refseq	FMT-1	Pretreatment
GAGCAGA_AGCTATT_GACCTGG	Anaerostipes caccae	GCF_036419175.1	99.01	refseq	FMT-1	Pretreatment
GCAAACT_GTGCGGT_TTGGCAA	Blautia coccoides	GCF_034355335.1	99.01	refseq	FMT-1	Pretreatment
GGTATTG_GCGATCA_GCATGAT	Phocaeicola vulgatus	GCF_000012825.1	99.01	refseq	FMT-1	Pretreatment
TTGAACG_ACGTAAA_CTCGAAA	Mediterraneibacter gnavus	GCF_016904015.1	99.01	refseq	FMT-1	Pretreatment
ACCAGTA_CGTAGCA_AAGGTTC	[Clostridium] innocuum	GCF_023008265.1	99	refseq	FMT-1	Pretreatment
AGAGCTT_TGAGGGA_GAAATGA	Phocaeicola vulgatus	GCF_024758205.1	99	refseq	FMT-1	Pretreatment
GCTCTGT_GAGTCCG_CACAAAC	Blautia coccoides	GCF_034355335.1	99	refseq	FMT-1	Pretreatment
CACACAA_ACAACAC_ATTACTC	Thomasclavelia ramosa	GCF_014131695.1	99	refseq	FMT-1	Pretreatment
CGTTCTG_GAATGAA_GTGCTTC	Blautia coccoides	GCF_034355335.1	99	refseq	FMT-1	Pretreatment
CATTATC_ACTGAAC_TCTTCGG	Blautia coccoides	GCF_034355335.1	99	refseq	FMT-1	Pretreatment
CATTATC_ACTTTCA_ATCCGAA	Phocaeicola vulgatus	GCF_000012825.1	99	refseq	FMT-1	Pretreatment
CGTAGCG_AGCGTCG_ACGCAGC	Phocaeicola vulgatus	GCF_020091465.1	99	refseq	FMT-1	Pretreatment
ACTGATG_CTGCCTA_GACGTTA	Phocaeicola vulgatus	GCF_036419465.1	99	refseq	FMT-1	Pretreatment
GCTGCAG_TGAGCCG_TTTGCGC	Blautia coccoides	GCF_034355335.1	99	refseq	FMT-1	Pretreatment
AAGACCT_GCGCGAT_CAGCAGC	Thomasclavelia ramosa	GCF_016027135.1	99	refseq	FMT-1	Pretreatment
AAGGTTC_CACAAGG_ATAAGGG	Thomasclavelia ramosa	GCF_016027135.1	99	refseq	FMT-1	Pretreatment
ACTTTCA_AGTTACG_GACCTGG	Phocaeicola vulgatus	GCF_018289355.1	99	refseq	FMT-1	Pretreatment
CGATGGC_AAACGTC_CACAAAC	Thomasclavelia ramosa	GCF_014131695.1	99	refseq	FMT-1	Pretreatment
AACCGCG_GCATACA_GAAATGA	Thomasclavelia ramosa	GCF_016027135.1	99	refseq	FMT-1	Pretreatment
CTCTACG_GCGATCA_ATTCTAC	Blautia coccoides	GCF_034355335.1	99	refseq	FMT-1	Pretreatment
AAGACCT_TATCTCA_AAATGAG	Blautia coccoides	GCF_034355335.1	99	refseq	FMT-1	Pretreatment
AACGTTG_TTCTCAA_CGTTAGA	Blautia coccoides	GCF_034355335.1	99	refseq	FMT-1	Pretreatment
GCGCCAA_TACTTGT_TCTCAGC	Blautia coccoides	GCF_034355335.1	99	refseq	FMT-1	Pretreatment
GAATAAG_AGTTACG_CGATTAT	Blautia coccoides	GCF_034355335.1	99	refseq	FMT-1	Pretreatment
GCAAACT_CACTCCA_AGGGCTT	Blautia coccoides	GCF_034355335.1	99	refseq	FMT-1	Pretreatment
CTTCTCT_CATATCG_CACACTC	Blautia coccoides	GCF_034355335.1	99	refseq	FMT-1	Pretreatment
CTAAGAC_GACGTGC_ATAAGGG	Thomasclavelia ramosa	GCF_016027135.1	99	refseq	FMT-1	Pretreatment
CAGCTAA_GAATGAA_GCATGAT	Phocaeicola vulgatus	GCF_020091465.1	99	refseq	FMT-1	Pretreatment
CAGCAGC_CTTCTCT_TCTTCGG	Blautia coccoides	GCF_034355335.1	99	refseq	FMT-1	Pretreatment
GTATCTT_GAGTCCG_TCTTCGG	Thomasclavelia ramosa	GCF_016027135.1	99	refseq	FMT-1	Pretreatment
TTTATGC_ATTGGAC_CGGAGTC	Thomasclavelia ramosa	GCF_014131695.1	99	refseq	FMT-1	Pretreatment
GTGGGTC_CATATCG_GCTGGGT	Thomasclavelia ramosa	GCF_016027135.1	99	refseq	FMT-1	Pretreatment
TCTTCGG_TTCTCAA_ATTTCTG	Blautia coccoides	GCF_034355335.1	99	refseq	FMT-1	Pretreatment
GGGCACT_AATCGGT_TGGACGC	Blautia coccoides	GCF_034355335.1	99	refseq	FMT-1	Pretreatment
GGTATTG_TGACTTT_TCCACAC	Thomasclavelia ramosa	GCF_020097255.1	99	refseq	FMT-1	Pretreatment
TACGGGC_TTAGGAC_TGGGAAG	Blautia coccoides	GCF_034355335.1	99	refseq	FMT-1	Pretreatment
TCAGGAT_GTGAAGG_ATTACTC	Blautia coccoides	GCF_034355335.1	99	refseq	FMT-1	Pretreatment
CCTACAC_AGACATA_CGTTAGA	[Clostridium] innocuum	GCF_023008265.1	98.99	refseq	FMT-1	Pretreatment
AGCTCTC_TAGGCAT_TCCACAC	[Clostridium] innocuum	GCF_023008265.1	98.99	refseq	FMT-1	Pretreatment
GCAGCCA_GGAAAGC_GCACTCT	Enterocloster bolteae	GCF_023008325.1	98.99	refseq	FMT-1	Pretreatment
CTAATGG_CAGATCA_GCATGAT	[Clostridium] innocuum	GCF_012271835.1	98.99	refseq	FMT-1	Pretreatment
GTTCATT_TCACGAA_GACGTTA	Blautia coccoides	GCF_034355335.1	98.99	refseq	FMT-1	Pretreatment
CTCGGAG_ACACCGG_CGTTAGA	Phocaeicola vulgatus	GCF_020885775.1	98.98	refseq	FMT-1	Pretreatment
CAGCTAA_ACGGGTC_CGTAGCG	Thomasclavelia ramosa	GCF_020097255.1	98.98	refseq	FMT-1	Pretreatment
ACGCCGA_TATCTCA_ATTTCTG	Thomasclavelia ramosa	GCF_016728785.1	98.98	refseq	FMT-1	Pretreatment
CGTAGCG_GATCGTA_TTAGGCA	[Clostridium] innocuum	GCF_023008265.1	98.98	refseq	FMT-1	Pretreatment
GCGCCAA_CAGATCA_ACGCAGC	Blautia coccoides	GCF_034355335.1	98.98	refseq	FMT-1	Pretreatment
CGCTTCA_GTGAAGG_ACGATAC	[Clostridium] innocuum	GCF_023008265.1	98.98	refseq	FMT-1	Pretreatment
AGGCCAC_AACCATG_CACAAAC	Thomasclavelia ramosa	GCF_016027135.1	98.98	refseq	FMT-1	Pretreatment
TACGGGC_GTATAAG_CGACTTC	[Clostridium] innocuum	GCF_023008265.1	98.98	refseq	FMT-1	Pretreatment
GGGCACT_TGTACCT_CTCGAAA	Phocaeicola vulgatus	GCF_024758205.1	98.98	refseq	FMT-1	Pretreatment
TTGAACG_AGCCTAA_TGGCGCA	[Clostridium] innocuum	GCF_012271835.1	98.98	refseq	FMT-1	Pretreatment
GACTACA_AGGTGTA_ATTCTAC	[Clostridium] innocuum	GCF_012271835.1	98.97	refseq	FMT-1	Pretreatment
ATCTACT_ATCATTC_TGAGAGG	[Clostridium] innocuum	GCF_012271835.1	98.97	refseq	FMT-1	Pretreatment
CTCGGAG_CATATCG_TCGAGGC	[Clostridium] innocuum	GCF_022845735.1	98.97	refseq	FMT-1	Pretreatment
ACTTGTT_GACCAAT_CGTAGCG	[Clostridium] innocuum	GCF_023008265.1	98.97	refseq	FMT-1	Pretreatment
GACGTTA_GTGCGGT_AATCTTG	[Clostridium] innocuum	GCF_022845735.1	98.97	refseq	FMT-1	Pretreatment
TTGCGTC_GGGTTGC_GGATGTT	Thomasclavelia ramosa	GCF_014131695.1	98.97	refseq	FMT-1	Pretreatment
GTGGGTC_GGGTTGC_TGAGAGG	Blautia coccoides	GCF_034355335.1	98.97	refseq	FMT-1	Pretreatment
CACACAA_GAGTCCG_GTGCTTC	Thomasclavelia ramosa	GCF_016027135.1	98.96	refseq	FMT-1	Pretreatment
AGTAGTC_CACACCT_AGTGGGA	Blautia coccoides	GCF_034355335.1	98.96	refseq	FMT-1	Pretreatment
ACTTGTT_TTGACTC_CGACTTC	Thomasclavelia ramosa	GCF_014131695.1	98.96	refseq	FMT-1	Pretreatment
AGGGTGA_AAACGTC_TCTGGAA	Thomasclavelia ramosa	GCF_016027135.1	98.96	refseq	FMT-1	Pretreatment
AAACCTG_CGGAGCT_ACCGTAA	Blautia coccoides	GCF_034355335.1	98.96	refseq	FMT-1	Pretreatment
CATTATC_GGCCGAT_GGGCTAA	Phocaeicola vulgatus	GCF_020091465.1	98.96	refseq	FMT-1	Pretreatment
AAGGTTC_GCATACA_CATAACT	Blautia coccoides	GCF_034355335.1	98.96	refseq	FMT-1	Pretreatment
ATCTACT_ACTTTCA_GGCGACT	Blautia coccoides	GCF_034355335.1	98.96	refseq	FMT-1	Pretreatment
CACACAA_TTGGAAC_TGGGAAG	Blautia coccoides	GCF_034355335.1	98.96	refseq	FMT-1	Pretreatment
CGAGAAG_AATCGGT_TCGAGGC	[Clostridium] innocuum	GCF_012317185.1	98.96	refseq	FMT-1	Pretreatment
AGTAGTC_GACCAAT_AAACAAC	Blautia coccoides	GCF_034355335.1	98.96	refseq	FMT-1	Pretreatment
CGGAGCT_TAGGCAT_ACGCAGC	Thomasclavelia ramosa	GCF_016728785.1	98.96	refseq	FMT-1	Pretreatment
GCGCCAA_GTGAAGG_CTGCGGA	Blautia coccoides	GCF_034355335.1	98.96	refseq	FMT-1	Pretreatment
AACGTTG_GTGCGGT_CATTCGC	Blautia coccoides	GCF_034355335.1	98.96	refseq	FMT-1	Pretreatment
AGTAGTC_GTATAAG_GTGCTTC	Blautia coccoides	GCF_034355335.1	98.96	refseq	FMT-1	Pretreatment
GACCTGG_TGTACCT_AACTCTT	Blautia coccoides	GCF_034355335.1	98.96	refseq	FMT-1	Pretreatment
ACTTGTT_GACCAAT_TAGACCA	Blautia coccoides	GCF_034355335.1	98.96	refseq	FMT-1	Pretreatment
CTCTACG_GTGCGGT_AGCGGTC	Eggerthella lenta	GCF_022845935.1	98.96	refseq	FMT-1	Pretreatment
CAGCTAA_AATCGGT_CGCGTTT	Blautia coccoides	GCF_034355335.1	98.96	refseq	FMT-1	Pretreatment
CACACAA_GCGATCA_TTTGCGC	Phocaeicola vulgatus	GCF_000012825.1	98.96	refseq	FMT-1	Pretreatment
GAAATGA_CTCAATA_AGTGGGA	Thomasclavelia ramosa	GCF_016728785.1	98.96	refseq	FMT-1	Pretreatment
CAAGAAA_GGGCACT_TGGCGCA	Phocaeicola vulgatus	GCF_020885775.1	98.96	refseq	FMT-1	Pretreatment
GACGTTA_GCACATA_GGAACTT	Blautia coccoides	GCF_034355335.1	98.96	refseq	FMT-1	Pretreatment
CTGCCTA_TAAGAGA_GTTGCTT	Blautia coccoides	GCF_034355335.1	98.96	refseq	FMT-1	Pretreatment
CTCTACG_TGAGCCG_CGTTAGA	Blautia coccoides	GCF_034355335.1	98.96	refseq	FMT-1	Pretreatment
ATGTGTG_GCTGCTT_TCAGATG	Phocaeicola vulgatus	GCF_008728395.1	98.96	refseq	FMT-1	Pretreatment
CTTAGGA_GACTGTC_CATAACT	Blautia coccoides	GCF_034355335.1	98.96	refseq	FMT-1	Pretreatment
CGAGAAG_CTCTACG_ATTTCTG	Phocaeicola vulgatus	GCF_008728395.1	98.96	refseq	FMT-1	Pretreatment
CTAGCCT_GAATGAA_CAGCAGC	Thomasclavelia ramosa	GCF_014131695.1	98.96	refseq	FMT-1	Pretreatment
CGAGAAG_TGCTTGC_CGGAGTC	Blautia coccoides	GCF_034355335.1	98.96	refseq	FMT-1	Pretreatment
CAAGAAA_AGCTATT_CGCGTTT	Blautia coccoides	GCF_034355335.1	98.96	refseq	FMT-1	Pretreatment
CTTAGGA_TTCGAAG_CTGAAAC	Phocaeicola vulgatus	GCF_020091465.1	98.96	refseq	FMT-1	Pretreatment
GAATAAG_TAAGAGA_TGAGAGG	Blautia coccoides	GCF_034355335.1	98.96	refseq	FMT-1	Pretreatment
ACGCCGA_TACTTGT_ATTTCTG	Phocaeicola vulgatus	GCF_020885855.1	98.96	refseq	FMT-1	Pretreatment
CTAGCCT_TCTGAGA_AAAGATG	Blautia coccoides	GCF_034355335.1	98.96	refseq	FMT-1	Pretreatment
GCATGCG_ACTGAAC_AAACAAC	Blautia coccoides	GCF_034355335.1	98.96	refseq	FMT-1	Pretreatment
GAATAAG_ACGAGGA_GACCTGG	Blautia coccoides	GCF_034355335.1	98.96	refseq	FMT-1	Pretreatment
CATTATC_AACTCAG_CGCGTTT	Blautia coccoides	GCF_034355335.1	98.96	refseq	FMT-1	Pretreatment
CTAAGAC_TATCTCA_ACGCAGC	Blautia coccoides	GCF_034355335.1	98.96	refseq	FMT-1	Pretreatment
ACTGATG_CACCTTA_AAACAAC	Blautia coccoides	GCF_034355335.1	98.96	refseq	FMT-1	Pretreatment
GAATAAG_GCACATA_AGCTCCT	Blautia coccoides	GCF_034355335.1	98.96	refseq	FMT-1	Pretreatment
ACTTGTT_ACTTTCA_TAGACCA	Phocaeicola vulgatus	GCF_020885715.1	98.96	refseq	FMT-1	Pretreatment
CTGCCTA_CGGAGCT_AGAATCT	Phocaeicola vulgatus	GCF_008728395.1	98.96	refseq	FMT-1	Pretreatment
CGAACAT_ACCAAGT_TTGCCGT	Blautia coccoides	GCF_034355335.1	98.96	refseq	FMT-1	Pretreatment
CGAACAT_TGAGGGA_AAGGTTC	Phocaeicola vulgatus	GCF_020091465.1	98.96	refseq	FMT-1	Pretreatment
CTTAGGA_TGAGGGA_TGGGAAG	Thomasclavelia ramosa	GCF_016027135.1	98.96	refseq	FMT-1	Pretreatment
AACGTTG_GACTGTC_ACGCAGC	Blautia coccoides	GCF_034355335.1	98.96	refseq	FMT-1	Pretreatment
CGAACAT_GACTGTC_GTGTGCG	Phocaeicola vulgatus	GCF_024022975.1	98.96	refseq	FMT-1	Pretreatment
GACTACA_GACCAAT_AGCTCCT	Phocaeicola vulgatus	GCF_020091465.1	98.96	refseq	FMT-1	Pretreatment
CGGAGCT_CACAAGG_TAAGCGT	Blautia coccoides	GCF_034355335.1	98.96	refseq	FMT-1	Pretreatment
CGTGAGC_AGACATA_AATCTTG	[Clostridium] innocuum	GCF_022845735.1	98.96	refseq	FMT-1	Pretreatment
ATGTGTG_GTGAAGG_TTAGGCA	Blautia coccoides	GCF_034355335.1	98.96	refseq	FMT-1	Pretreatment
GCAAACT_ACGGGTC_GACCTGG	Blautia coccoides	GCF_034355335.1	98.96	refseq	FMT-1	Pretreatment
CTTAGGA_CATATCG_TGACGGC	Blautia coccoides	GCF_034355335.1	98.96	refseq	FMT-1	Pretreatment
CTCGGAG_CATATCG_CGACTTC	Blautia coccoides	GCF_034355335.1	98.96	refseq	FMT-1	Pretreatment
AGGGTGA_CGAATGT_TCAGATG	Mediterraneibacter gnavus	GCF_016904015.1	98.96	refseq	FMT-1	Pretreatment
CAGAGAG_TGGCTGG_TACAGTG	Blautia coccoides	GCF_034355335.1	98.96	refseq	FMT-1	Pretreatment
GAATAAG_ACAACAC_ACCGTAA	Blautia coccoides	GCF_034355335.1	98.96	refseq	FMT-1	Pretreatment
GATCGAT_TGGCTGG_TGGACGC	Thomasclavelia ramosa	GCF_016728785.1	98.96	refseq	FMT-1	Pretreatment
TCGGGAC_CTCCTAG_GTGTGCG	Thomasclavelia ramosa	GCF_014131695.1	98.96	refseq	FMT-1	Pretreatment
TACACGA_GCCTCTA_ACGATAC	Thomasclavelia ramosa	GCF_014131695.1	98.96	refseq	FMT-1	Pretreatment
TGCTGCT_TAAGAGA_CTAAGAC	Blautia coccoides	GCF_034355335.1	98.96	refseq	FMT-1	Pretreatment
TCTCATA_AGCGTCG_TGATTTC	Blautia coccoides	GCF_034355335.1	98.96	refseq	FMT-1	Pretreatment
GTTCATT_GACTGTC_ACTGAGT	[Clostridium] innocuum	GCF_023008265.1	98.96	refseq	FMT-1	Pretreatment
TGCTGCT_CACCTTA_TCAGATG	Phocaeicola vulgatus	GCF_036419465.1	98.96	refseq	FMT-1	Pretreatment
GGCTCGA_GGTAGTG_CTCACAC	Blautia coccoides	GCF_034355335.1	98.96	refseq	FMT-1	Pretreatment
GTGTTAG_TCTGAGA_AGGAGGT	Blautia coccoides	GCF_034355335.1	98.96	refseq	FMT-1	Pretreatment
GTTCATT_CAGGTGC_TCCACAC	[Clostridium] innocuum	GCF_022845735.1	98.96	refseq	FMT-1	Pretreatment
TCGGGAC_AACCATG_TGGGAAG	Blautia coccoides	GCF_034355335.1	98.96	refseq	FMT-1	Pretreatment
TTTATGC_ACTTTCA_CTCACAC	Blautia coccoides	GCF_034355335.1	98.96	refseq	FMT-1	Pretreatment
TCTCATA_CAGATCA_CGATTAT	Phocaeicola vulgatus	GCF_020885855.1	98.96	refseq	FMT-1	Pretreatment
TCGGGAC_TGAGGGA_CATTCGC	Blautia coccoides	GCF_034355335.1	98.96	refseq	FMT-1	Pretreatment
TTAGGCA_CTCAATA_GGAACTT	Blautia coccoides	GCF_034355335.1	98.96	refseq	FMT-1	Pretreatment
TGCCAAA_AACCATG_AGAATCT	Blautia coccoides	GCF_034355335.1	98.96	refseq	FMT-1	Pretreatment
TGAGCCG_TGAGCCG_CACACTC	Blautia coccoides	GCF_034355335.1	98.96	refseq	FMT-1	Pretreatment
GTGCAGC_TGACTTT_AGTGGGA	Blautia coccoides	GCF_034355335.1	98.96	refseq	FMT-1	Pretreatment
TTTACTG_ATCATTC_CATTCGC	Blautia coccoides	GCF_034355335.1	98.96	refseq	FMT-1	Pretreatment
TTGAACG_CGGAGCT_CGTAGCG	Blautia coccoides	GCF_034355335.1	98.96	refseq	FMT-1	Pretreatment
TTTATGC_AAGACCT_CACAAAC	Phocaeicola vulgatus	GCF_024022975.1	98.96	refseq	FMT-1	Pretreatment
GGAAAGC_GACGTGC_CGGAGTC	Blautia coccoides	GCF_034355335.1	98.96	refseq	FMT-1	Pretreatment
GGGCACT_ATAAGAG_TACTCAT	Blautia coccoides	GCF_034355335.1	98.96	refseq	FMT-1	Pretreatment
GGCAATT_CTTCTCT_AGCTCCT	Thomasclavelia ramosa	GCF_014131695.1	98.96	refseq	FMT-1	Pretreatment
GGTATTG_TCAGATG_CGGAGTC	Blautia coccoides	GCF_034355335.1	98.96	refseq	FMT-1	Pretreatment
TTGCGTC_CACAAGG_ACGGCCA	Thomasclavelia ramosa	GCF_014131695.1	98.96	refseq	FMT-1	Pretreatment
TCACGAA_GGGCACT_GGTAGTG	Thomasclavelia ramosa	GCF_016728785.1	98.96	refseq	FMT-1	Pretreatment
GCTGGGT_AGCGTCG_GGAGCAA	Blautia coccoides	GCF_034355335.1	98.95	refseq	FMT-1	Pretreatment
ACTTGTT_GACGTGC_GGCGACT	[Clostridium] innocuum	GCF_023008265.1	98.95	refseq	FMT-1	Pretreatment
GGTATTG_AACTCAG_GGGTTGC	[Clostridium] innocuum	GCF_012271835.1	98.95	refseq	FMT-1	Pretreatment
TTGCGTC_TTGGAAC_GAACCTA	Mediterraneibacter gnavus	GCF_009831375.1	98.95	refseq	FMT-1	Pretreatment
GCTGGGT_TAAGAGA_TACAGTG	Phocaeicola vulgatus	GCF_000012825.1	98.94	refseq	FMT-1	Pretreatment
GCAGCCA_ACGGGTC_TTGCCGT	Phocaeicola vulgatus	GCF_024758205.1	98.94	refseq	FMT-1	Pretreatment
AGCGTCG_GGGTTGC_CGCTATC	[Clostridium] innocuum	GCF_012271835.1	98.94	refseq	FMT-1	Pretreatment
CGTAGCG_CGATGTA_GACCTGG	Blautia coccoides	GCF_034355335.1	98.94	refseq	FMT-1	Pretreatment
CTGCCTA_CAAGTTG_CTCACAC	[Clostridium] innocuum	GCF_012271835.1	98.94	refseq	FMT-1	Pretreatment
GCTGGGT_CACACCT_ACGATAC	[Clostridium] innocuum	GCF_012271835.1	98.94	refseq	FMT-1	Pretreatment
CCTACAC_GGGTTGC_CTTGGCT	[Clostridium] innocuum	GCF_012271835.1	98.94	refseq	FMT-1	Pretreatment
ATCTACT_CGCGGTA_GTTGCTT	[Clostridium] innocuum	GCF_023008265.1	98.94	refseq	FMT-1	Pretreatment
CTAAGAC_CTCTACG_AGGGCTT	[Clostridium] innocuum	GCF_012271835.1	98.94	refseq	FMT-1	Pretreatment
GTGTTAG_AGTTACG_TTCGGAC	Blautia coccoides	GCF_034355335.1	98.94	refseq	FMT-1	Pretreatment
GACCTGG_GTTCATT_TTCGGAC	[Clostridium] innocuum	GCF_012271835.1	98.93	refseq	FMT-1	Pretreatment
CTCGGAG_ATTGGAC_TAAGCGT	[Clostridium] innocuum	GCF_012271835.1	98.93	refseq	FMT-1	Pretreatment
GCAGCCA_CTGCCTA_TGGCGCA	[Clostridium] innocuum	GCF_012271835.1	98.93	refseq	FMT-1	Pretreatment
GCAGCCA_CACCTTA_ATTCTAC	[Clostridium] innocuum	GCF_023008265.1	98.93	refseq	FMT-1	Pretreatment
TCTTCGG_GTGAAGG_ACGATAC	Thomasclavelia ramosa	GCF_014131695.1	98.93	refseq	FMT-1	Pretreatment
GGAAAGC_GGCCGAT_GAACCTA	[Clostridium] innocuum	GCF_012271835.1	98.93	refseq	FMT-1	Pretreatment
TACTTAC_ACGGGTC_GCACTCT	Phocaeicola vulgatus	GCF_024758205.1	98.93	refseq	FMT-1	Pretreatment
CGAGAAG_AAGACCT_TGGCGCA	Thomasclavelia ramosa	GCF_016027135.1	98.92	refseq	FMT-1	Pretreatment
AGGCCAC_TTAGGAC_CGATTAT	[Clostridium] innocuum	GCF_012271835.1	98.92	refseq	FMT-1	Pretreatment
ACGCCGA_ATAAGAG_AACTCTT	Thomasclavelia ramosa	GCF_014131695.1	98.92	refseq	FMT-1	Pretreatment
CACACAA_TTGGAAC_TTTGCGC	Thomasclavelia ramosa	GCF_016027135.1	98.92	refseq	FMT-1	Pretreatment
CTAAGAC_CGTTGGG_TAGACCA	Thomasclavelia ramosa	GCF_016728785.1	98.92	refseq	FMT-1	Pretreatment
GCTGGGT_TTGGAAC_TCGTAGA	Phocaeicola vulgatus	GCF_000012825.1	98.92	refseq	FMT-1	Pretreatment
GAAATGA_CGATGTA_TTTGCGC	Blautia coccoides	GCF_034355335.1	98.92	refseq	FMT-1	Pretreatment
AAGACCT_TGAGGGA_ACTACCT	Blautia coccoides	GCF_034355335.1	98.92	refseq	FMT-1	Pretreatment
CAGCAGC_ACTGAAC_CATTCGC	Phocaeicola vulgatus	GCF_008728395.1	98.92	refseq	FMT-1	Pretreatment
AAGACCT_GAATGAA_AATCTTG	Blautia coccoides	GCF_034355335.1	98.92	refseq	FMT-1	Pretreatment
AACGTTG_GAGTCCG_CGCTATC	Blautia coccoides	GCF_034355335.1	98.92	refseq	FMT-1	Pretreatment
CTTAGGA_TGCTTGC_GAACCTA	Blautia coccoides	GCF_034355335.1	98.92	refseq	FMT-1	Pretreatment
CACATTT_ACGAGGA_CGAACAT	Blautia coccoides	GCF_034355335.1	98.92	refseq	FMT-1	Pretreatment
CACACAA_CGATGTA_GGGCTAA	Blautia coccoides	GCF_034355335.1	98.92	refseq	FMT-1	Pretreatment
AACCGCG_GTGCGGT_TACAGTG	Blautia coccoides	GCF_034355335.1	98.92	refseq	FMT-1	Pretreatment
GACCTGG_CTTCTCT_AGCGGTC	[Clostridium] innocuum	GCF_012271835.1	98.92	refseq	FMT-1	Pretreatment
CGAACAT_GTCGTAA_TACAGTG	Thomasclavelia ramosa	GCF_016027135.1	98.92	refseq	FMT-1	Pretreatment
CAGCAGC_GAATGAA_AGTAGTC	Blautia coccoides	GCF_034355335.1	98.92	refseq	FMT-1	Pretreatment
CTTAGGA_ATGTGTG_TGACGGC	Blautia coccoides	GCF_034355335.1	98.92	refseq	FMT-1	Pretreatment
CGAGAAG_GTTCATT_CTTGGCT	Blautia coccoides	GCF_034355335.1	98.92	refseq	FMT-1	Pretreatment
GACGTTA_GTTCTCG_GCTGCAG	Blautia coccoides	GCF_034355335.1	98.92	refseq	FMT-1	Pretreatment
GATCGAT_GTTCATT_AGGGCTT	Blautia coccoides	GCF_034355335.1	98.92	refseq	FMT-1	Pretreatment
ATGTGTG_ACGAGGA_GGGCTAA	Blautia coccoides	GCF_034355335.1	98.92	refseq	FMT-1	Pretreatment
CTAATGG_TTTGCCA_CGTAGCG	Phocaeicola vulgatus	GCF_020091465.1	98.92	refseq	FMT-1	Pretreatment
AGAGCTT_ACAACAC_AAATGAG	Blautia coccoides	GCF_034355335.1	98.92	refseq	FMT-1	Pretreatment
GACCTGG_GATCGTA_GTGCTTC	Thomasclavelia ramosa	GCF_014131695.1	98.92	refseq	FMT-1	Pretreatment
ACGCCGA_GAGTCCG_TCAGATG	Blautia coccoides	GCF_034355335.1	98.92	refseq	FMT-1	Pretreatment
ACCGTAA_AAGACCT_CGCGTTT	Blautia coccoides	GCF_034355335.1	98.92	refseq	FMT-1	Pretreatment
CATTATC_AGCGTCG_ACCGTAA	Blautia coccoides	GCF_034355335.1	98.92	refseq	FMT-1	Pretreatment
CTGCCTA_CACAAGG_GGAACTT	Phocaeicola vulgatus	GCF_024758205.1	98.92	refseq	FMT-1	Pretreatment
GCAAACT_CTCACAC_GGAACTT	Phocaeicola vulgatus	GCF_018289355.1	98.92	refseq	FMT-1	Pretreatment
TCACGAA_ACTTTCA_ACACTGA	Blautia coccoides	GCF_034355335.1	98.92	refseq	FMT-1	Pretreatment
GGACGTC_GTATAAG_ACTGAGT	Blautia coccoides	GCF_034355335.1	98.92	refseq	FMT-1	Pretreatment
TTTATGC_CAGATCA_GATCTAG	Blautia coccoides	GCF_034355335.1	98.92	refseq	FMT-1	Pretreatment
TCAGCTC_TTCGAAG_CACAAAC	Blautia coccoides	GCF_034355335.1	98.92	refseq	FMT-1	Pretreatment
GGACGTC_CTCAATA_ATTACTC	Blautia coccoides	GCF_034355335.1	98.92	refseq	FMT-1	Pretreatment
GTAACGT_GACCAAT_GGAGCAA	Thomasclavelia ramosa	GCF_016027135.1	98.92	refseq	FMT-1	Pretreatment
TCAGCTC_ATGTGTG_TTTGCGC	Blautia coccoides	GCF_034355335.1	98.92	refseq	FMT-1	Pretreatment
TGCCAAA_TTCGAAG_AATCTTG	Blautia coccoides	GCF_034355335.1	98.92	refseq	FMT-1	Pretreatment
TTTATGC_ATAAGAG_TGAGAGG	Blautia coccoides	GCF_034355335.1	98.92	refseq	FMT-1	Pretreatment
TGCCAAA_TCTATTG_CGATTAT	Blautia coccoides	GCF_034355335.1	98.92	refseq	FMT-1	Pretreatment
TCAGGAT_TTCTCAA_AAACAAC	Blautia coccoides	GCF_034355335.1	98.92	refseq	FMT-1	Pretreatment
TCTCATA_AGTTACG_GACCTGG	Thomasclavelia ramosa	GCF_014131695.1	98.92	refseq	FMT-1	Pretreatment
TCAGCTC_GTTCATT_GAAATGA	Blautia coccoides	GCF_034355335.1	98.92	refseq	FMT-1	Pretreatment
GGCTCGA_GATCGTA_ATTACTC	Blautia coccoides	GCF_034355335.1	98.92	refseq	FMT-1	Pretreatment
GTGCAGC_ATAAGAG_GCCAAAT	Enterocloster bolteae	GCF_023008325.1	98.92	refseq	FMT-1	Pretreatment
TCGTAGA_CACACCT_CAGTAAC	Blautia coccoides	GCF_034355335.1	98.92	refseq	FMT-1	Pretreatment
TGCCAAA_GCCTCTA_GAACCTA	Blautia coccoides	GCF_034355335.1	98.92	refseq	FMT-1	Pretreatment
TAGCCGG_TATCTCA_TACTCAT	Blautia coccoides	GCF_034355335.1	98.92	refseq	FMT-1	Pretreatment
GCTCTGT_TGACTTT_CGACTTC	Blautia coccoides	GCF_034355335.1	98.91	refseq	FMT-1	Pretreatment
GATCGAT_CTTCTCT_TACAGTG	Blautia coccoides	GCF_034355335.1	98.91	refseq	FMT-1	Pretreatment
CTAATGG_GTAACTG_GGTAGTG	[Clostridium] innocuum	GCF_023008265.1	98.91	refseq	FMT-1	Pretreatment
CGTGAGC_GTTCATT_CGCGTTT	Thomasclavelia ramosa	GCF_016728785.1	98.91	refseq	FMT-1	Pretreatment
ATGTGTG_GCGCGAT_GCCAAAT	Phocaeicola vulgatus	GCF_008728395.1	98.91	refseq	FMT-1	Pretreatment
GATCGAT_ACTGAAC_GAAATGA	Blautia coccoides	GCF_034355335.1	98.91	refseq	FMT-1	Pretreatment
ACCGTAA_CAGGTGC_CGACTTC	Blautia coccoides	GCF_034355335.1	98.91	refseq	FMT-1	Pretreatment
GAATAAG_ACTGAAC_CAGTAAC	Blautia coccoides	GCF_034355335.1	98.91	refseq	FMT-1	Pretreatment
GACGTTA_GTATAAG_CGATTAT	Blautia coccoides	GCF_034355335.1	98.91	refseq	FMT-1	Pretreatment
GACGTTA_AGACATA_AGCGGTC	Blautia coccoides	GCF_034355335.1	98.91	refseq	FMT-1	Pretreatment
GCAGCCA_CACACCT_ACGATAC	Thomasclavelia ramosa	GCF_016728785.1	98.91	refseq	FMT-1	Pretreatment
GACGTTA_TATCTCA_TTTGCGC	Blautia coccoides	GCF_034355335.1	98.91	refseq	FMT-1	Pretreatment
GCTGCAG_GCACATA_CGCGTTT	Blautia coccoides	GCF_034355335.1	98.91	refseq	FMT-1	Pretreatment
CCTACAC_CGATGTA_TAGACCA	Thomasclavelia ramosa	GCF_016728785.1	98.91	refseq	FMT-1	Pretreatment
CAGCTAA_CATTCGC_GCGGGTT	Phocaeicola vulgatus	GCF_020091465.1	98.91	refseq	FMT-1	Pretreatment
AGTAGTC_GGGTTGC_AGTGGGA	Blautia coccoides	GCF_034355335.1	98.91	refseq	FMT-1	Pretreatment
CAGCAGC_AGGTGTA_ATTTCTG	Thomasclavelia ramosa	GCF_016027135.1	98.91	refseq	FMT-1	Pretreatment
CCTACAC_CGTTGGG_CATATGG	Thomasclavelia ramosa	GCF_020097255.1	98.91	refseq	FMT-1	Pretreatment
TGTGTTT_CTCAATA_GAAATGA	Blautia coccoides	GCF_034355335.1	98.91	refseq	FMT-1	Pretreatment
TCTTCGG_GGGCACT_AAAGATG	Blautia coccoides	GCF_034355335.1	98.91	refseq	FMT-1	Pretreatment
TGTGTTT_GATCGTA_TAGACCA	Blautia coccoides	GCF_034355335.1	98.91	refseq	FMT-1	Pretreatment
TCGGGAC_GTATAAG_ACCGTAA	Thomasclavelia ramosa	GCF_014131695.1	98.91	refseq	FMT-1	Pretreatment
GGACGTC_GAAACTC_GTTGCTT	Blautia coccoides	GCF_034355335.1	98.91	refseq	FMT-1	Pretreatment
GGTATTG_GGTAGTG_CGATTAT	Blautia coccoides	GCF_034355335.1	98.91	refseq	FMT-1	Pretreatment
TCGTAGA_AGTTACG_ACGGCCA	[Clostridium] innocuum	GCF_022845735.1	98.91	refseq	FMT-1	Pretreatment
TCTCATA_GATCGTA_AATCTTG	Phocaeicola vulgatus	GCF_024758205.1	98.91	refseq	FMT-1	Pretreatment
TTGAACG_AAGACCT_AAATGAG	[Clostridium] innocuum	GCF_023008265.1	98.91	refseq	FMT-1	Pretreatment
TTAGGCA_CGTAGCA_CGTTAGA	Blautia coccoides	GCF_034355335.1	98.91	refseq	FMT-1	Pretreatment
TCAGCTC_TTGACTC_CATTCGC	Blautia coccoides	GCF_034355335.1	98.91	refseq	FMT-1	Pretreatment
CAGCAGC_GAAACTC_GCACTCT	[Clostridium] innocuum	GCF_012271835.1	98.9	refseq	FMT-1	Pretreatment
CTTCTCT_GGTAGTG_CGCGTTT	[Clostridium] innocuum	GCF_023008265.1	98.9	refseq	FMT-1	Pretreatment
TGTGTTT_ACCAAGT_TTGGCAA	[Clostridium] innocuum	GCF_012271835.1	98.9	refseq	FMT-1	Pretreatment
TCTTCGG_ACGGGTC_CGTAGCG	Mediterraneibacter gnavus	GCF_020181455.1	98.9	refseq	FMT-1	Pretreatment
TCTCATA_ATGTGTG_GATCTAG	[Clostridium] innocuum	GCF_023008265.1	98.9	refseq	FMT-1	Pretreatment
GTGCAGC_GACCAAT_AGAATCT	[Clostridium] innocuum	GCF_023008265.1	98.9	refseq	FMT-1	Pretreatment
CGATGGC_AATCGGT_ACGATAC	Blautia coccoides	GCF_034355335.1	98.89	refseq	FMT-1	Pretreatment
ACCAGTA_GCTGCTT_CGTTAGA	Blautia coccoides	GCF_034355335.1	98.89	refseq	FMT-1	Pretreatment
ACTTGTT_GTTCTCG_AATCTTG	Blautia coccoides	GCF_034355335.1	98.89	refseq	FMT-1	Pretreatment
AGGGTGA_TAAGAGA_CTGAAAC	Blautia coccoides	GCF_034355335.1	98.89	refseq	FMT-1	Pretreatment
AGCTCTC_GGCCGAT_TACAGTG	Blautia coccoides	GCF_034355335.1	98.89	refseq	FMT-1	Pretreatment
CTTAGGA_GTGCGGT_AAACAAC	Blautia coccoides	GCF_034355335.1	98.89	refseq	FMT-1	Pretreatment
CGATGGC_TTGACTC_ACTACCT	Phocaeicola vulgatus	GCF_020091465.1	98.89	refseq	FMT-1	Pretreatment
CACATTT_GTAACTG_TTGGCAA	Blautia coccoides	GCF_034355335.1	98.89	refseq	FMT-1	Pretreatment
GACGTTA_TGACTTT_AGTGGGA	Phocaeicola vulgatus	GCF_018289355.1	98.89	refseq	FMT-1	Pretreatment
AACCGCG_GTTCTCG_GGGCTAA	Blautia coccoides	GCF_034355335.1	98.89	refseq	FMT-1	Pretreatment
CACATTT_TGACTTT_GGGTTGC	Blautia coccoides	GCF_034355335.1	98.89	refseq	FMT-1	Pretreatment
GAATAAG_ACGAGGA_AGGGCTT	Blautia coccoides	GCF_034355335.1	98.89	refseq	FMT-1	Pretreatment
CGCTTCA_AAGACCT_GCGGGTT	Thomasclavelia ramosa	GCF_016027135.1	98.89	refseq	FMT-1	Pretreatment
CTAATGG_CGTGTCT_TTTGCGC	Blautia coccoides	GCF_034355335.1	98.89	refseq	FMT-1	Pretreatment
GACCTGG_CGCGGTA_ACTGAGT	Blautia coccoides	GCF_034355335.1	98.89	refseq	FMT-1	Pretreatment
CTCTACG_TGACTTT_CACACTC	Blautia coccoides	GCF_034355335.1	98.89	refseq	FMT-1	Pretreatment
CGTAGCG_CTGCCTA_GTGCTTC	Phocaeicola vulgatus	GCF_020091465.1	98.89	refseq	FMT-1	Pretreatment
CGATGGC_CTCTACG_AAACAAC	Blautia coccoides	GCF_034355335.1	98.89	refseq	FMT-1	Pretreatment
CTCTACG_TCAGATG_TGGACGC	Blautia coccoides	GCF_034355335.1	98.89	refseq	FMT-1	Pretreatment
AGGGTGA_GTATAAG_AGGGCTT	Blautia coccoides	GCF_034355335.1	98.89	refseq	FMT-1	Pretreatment
CGTTCTG_CATTCGC_GATCTAG	Blautia coccoides	GCF_034355335.1	98.89	refseq	FMT-1	Pretreatment
CATTATC_GACCAAT_CATTCGC	Blautia coccoides	GCF_034355335.1	98.89	refseq	FMT-1	Pretreatment
CGCTTCA_AAGACCT_ACTGAGT	Anaerostipes caccae	GCF_036419175.1	98.89	refseq	FMT-1	Pretreatment
GCTGCAG_TGTACCT_AGAATCT	[Clostridium] innocuum	GCF_023008265.1	98.89	refseq	FMT-1	Pretreatment
AAACCTG_TTGGAAC_ACGATAC	Blautia coccoides	GCF_034355335.1	98.89	refseq	FMT-1	Pretreatment
CAGCTAA_CAAGTTG_GTAATCG	Thomasclavelia ramosa	GCF_016728785.1	98.89	refseq	FMT-1	Pretreatment
CTCGGAG_GTTCTCG_AAAGATG	Phocaeicola vulgatus	GCF_024758205.1	98.89	refseq	FMT-1	Pretreatment
CAAGAAA_AGGTGTA_GAAATGA	Blautia coccoides	GCF_034355335.1	98.89	refseq	FMT-1	Pretreatment
ACTTGTT_TCTGAGA_GCTGCAG	Blautia coccoides	GCF_034355335.1	98.89	refseq	FMT-1	Pretreatment
ACCGTAA_CTCAATA_GACGTTA	Blautia coccoides	GCF_034355335.1	98.89	refseq	FMT-1	Pretreatment
CATTATC_TGAGCCG_GCACTCT	Phocaeicola vulgatus	GCF_020885855.1	98.89	refseq	FMT-1	Pretreatment
CTCTACG_GTTCATT_ACTGAGT	Blautia coccoides	GCF_034355335.1	98.89	refseq	FMT-1	Pretreatment
ATCTACT_ACTTTCA_GCGCAAC	Blautia coccoides	GCF_034355335.1	98.89	refseq	FMT-1	Pretreatment
CGATGGC_TCAGATG_GATCTAG	Thomasclavelia ramosa	GCF_016728785.1	98.89	refseq	FMT-1	Pretreatment
AGGGTGA_GGAGCAA_ACTGAGT	[Clostridium] innocuum	GCF_023008265.1	98.89	refseq	FMT-1	Pretreatment
ACTTGTT_ACGAGGA_AAGGTTC	Blautia coccoides	GCF_034355335.1	98.89	refseq	FMT-1	Pretreatment
GACTACA_AGCTATT_CTCGAAA	Blautia coccoides	GCF_034355335.1	98.89	refseq	FMT-1	Pretreatment
AGGGTGA_TAAGAGA_GTAATCG	Blautia coccoides	GCF_034355335.1	98.89	refseq	FMT-1	Pretreatment
AACGTTG_AGCCTAA_ATCCGAA	Blautia coccoides	GCF_034355335.1	98.89	refseq	FMT-1	Pretreatment
CGTAGCG_CGTGTCT_GATCTAG	Blautia coccoides	GCF_034355335.1	98.89	refseq	FMT-1	Pretreatment
GAAATGA_AACCATG_GGGCTAA	Blautia coccoides	GCF_034355335.1	98.89	refseq	FMT-1	Pretreatment
ATGTGTG_ATCATTC_CTTGGCT	Thomasclavelia ramosa	GCF_014131695.1	98.89	refseq	FMT-1	Pretreatment
GGAAAGC_AAGACCT_AGAATCT	Phocaeicola vulgatus	GCF_000012825.1	98.89	refseq	FMT-1	Pretreatment
ACTGATG_ACTGAAC_GCGGGTT	Blautia coccoides	GCF_034355335.1	98.89	refseq	FMT-1	Pretreatment
ACTTTCA_TCAGATG_ACTACCT	Thomasclavelia ramosa	GCF_014131695.1	98.89	refseq	FMT-1	Pretreatment
CGAACAT_GACGTGC_AGGGCTT	Eggerthella lenta	GCF_021378705.1	98.89	refseq	FMT-1	Pretreatment
GATCGAT_GAATGAA_AACTCTT	Blautia coccoides	GCF_034355335.1	98.89	refseq	FMT-1	Pretreatment
GGCTCGA_TAAGAGA_TTTGCGC	Blautia coccoides	GCF_034355335.1	98.89	refseq	FMT-1	Pretreatment
TACACGA_GTGAAGG_CTGAAAC	Blautia coccoides	GCF_034355335.1	98.89	refseq	FMT-1	Pretreatment
TTTACTG_AAATCCA_CATATGG	Blautia coccoides	GCF_034355335.1	98.89	refseq	FMT-1	Pretreatment
TCTCATA_AACTCAG_ACTGAGT	Blautia coccoides	GCF_034355335.1	98.89	refseq	FMT-1	Pretreatment
GTGCAGC_AGCCTAA_TGACGGC	Blautia coccoides	GCF_034355335.1	98.89	refseq	FMT-1	Pretreatment
TTTATGC_TGTACCT_CGATTAT	Blautia coccoides	GCF_034355335.1	98.89	refseq	FMT-1	Pretreatment
GGCTCGA_CTTCTCT_CGACTTC	Blautia coccoides	GCF_034355335.1	98.89	refseq	FMT-1	Pretreatment
TCACGAA_CGTAGCA_TGACGGC	Blautia coccoides	GCF_034355335.1	98.89	refseq	FMT-1	Pretreatment
GGAAAGC_GTGCGGT_CACACTC	Blautia coccoides	GCF_034355335.1	98.89	refseq	FMT-1	Pretreatment
TTGCGTC_TGCTTGC_CGTAGCG	Blautia coccoides	GCF_034355335.1	98.89	refseq	FMT-1	Pretreatment
GTGGGTC_CTGCCTA_ACCGTAA	Blautia coccoides	GCF_034355335.1	98.89	refseq	FMT-1	Pretreatment
TCACGAA_GTGAAGG_TGGGAAG	[Clostridium] innocuum	GCF_012271835.1	98.89	refseq	FMT-1	Pretreatment
GTAACGT_GGGTTGC_TCAGATG	Blautia coccoides	GCF_034355335.1	98.89	refseq	FMT-1	Pretreatment
TCGTAGA_AAGACCT_ACACTGA	Blautia coccoides	GCF_034355335.1	98.89	refseq	FMT-1	Pretreatment
GTGGGTC_GTCGTAA_GCGCAAC	Thomasclavelia ramosa	GCF_014131695.1	98.89	refseq	FMT-1	Pretreatment
TACTTAC_CATTCGC_CATAACT	Blautia coccoides	GCF_034355335.1	98.89	refseq	FMT-1	Pretreatment
GGCAATT_AGCTATT_AGGGCTT	Blautia coccoides	GCF_034355335.1	98.89	refseq	FMT-1	Pretreatment
TCGTAGA_TCGTCTT_CGGAGTC	Blautia coccoides	GCF_034355335.1	98.89	refseq	FMT-1	Pretreatment
TACACGA_ACAACAC_CTGCGGA	Blautia coccoides	GCF_034355335.1	98.89	refseq	FMT-1	Pretreatment
GTATCTT_CACTCCA_CAGCAGC	Blautia coccoides	GCF_034355335.1	98.89	refseq	FMT-1	Pretreatment
GGGCACT_ACGGGTC_TCTGGAA	Blautia coccoides	GCF_034355335.1	98.89	refseq	FMT-1	Pretreatment
TCACGAA_CTGCCTA_TGGACGC	Blautia coccoides	GCF_034355335.1	98.89	refseq	FMT-1	Pretreatment
TAGCCGG_TCACGAA_GGGTTGC	Blautia coccoides	GCF_034355335.1	98.89	refseq	FMT-1	Pretreatment
GTGGGTC_GGGTTGC_CGATTAT	Phocaeicola vulgatus	GCF_020885855.1	98.89	refseq	FMT-1	Pretreatment
TGCCAAA_ACGCAGA_TTGGCAA	[Clostridium] innocuum	GCF_023008265.1	98.88	refseq	FMT-1	Pretreatment
GGGCACT_CAGATCA_GCTGGGT	Thomasclavelia ramosa	GCF_016728785.1	98.88	refseq	FMT-1	Pretreatment
ACTTTCA_GACTGTC_CTTGGCT	[Clostridium] innocuum	GCF_022845735.1	98.87	refseq	FMT-1	Pretreatment
ACGCCGA_AAACGTC_CTCCTAG	[Clostridium] innocuum	GCF_012271835.1	98.87	refseq	FMT-1	Pretreatment
ATCACGA_GGCCGAT_GCACTCT	Blautia coccoides	GCF_034355335.1	98.87	refseq	FMT-1	Pretreatment
TACACGA_ACGTAAA_AACTCTT	Thomasclavelia ramosa	GCF_016728785.1	98.87	refseq	FMT-1	Pretreatment
GTGTTAG_ATGTGTG_CGAACAT	[Clostridium] innocuum	GCF_012271835.1	98.87	refseq	FMT-1	Pretreatment
GTGGGTC_AGGTGTA_GCGGGTT	[Clostridium] innocuum	GCF_012271835.1	98.87	refseq	FMT-1	Pretreatment
CACACAA_CTGCCTA_GAAATGA	[Clostridium] innocuum	GCF_023008265.1	98.86	refseq	FMT-1	Pretreatment
AGGCCAC_GAGTCCG_TCTGGAA	[Clostridium] innocuum	GCF_022845735.1	98.86	refseq	FMT-1	Pretreatment
GCTGCAG_AACCATG_GACCTGG	Enterocloster bolteae	GCF_023008325.1	98.86	refseq	FMT-1	Pretreatment
GACGTTA_GGCCGAT_CATATGG	[Clostridium] innocuum	GCF_012271835.1	98.86	refseq	FMT-1	Pretreatment
GGCAATT_TTAGGAC_GGAGCAA	[Clostridium] innocuum	GCF_023008265.1	98.86	refseq	FMT-1	Pretreatment
TTTATGC_ACGTAAA_CGTAGCG	[Clostridium] innocuum	GCF_022845735.1	98.86	refseq	FMT-1	Pretreatment
TCACGAA_TCTGAGA_ATTTCTG	[Clostridium] innocuum	GCF_012271835.1	98.86	refseq	FMT-1	Pretreatment
CGCTTCA_TGCTTGC_CTTGGCT	Blautia coccoides	GCF_034355335.1	98.85	refseq	FMT-1	Pretreatment
GCAGCCA_CGGAGCT_CTCACAC	Blautia coccoides	GCF_034355335.1	98.85	refseq	FMT-1	Pretreatment
CAGAGAG_CGCGGTA_CTCGAAA	Blautia coccoides	GCF_034355335.1	98.85	refseq	FMT-1	Pretreatment
AGGGTGA_AGCCTAA_GCTGGGT	Blautia coccoides	GCF_034355335.1	98.85	refseq	FMT-1	Pretreatment
CGTAGCG_ATAAGAG_ACTACCT	Blautia coccoides	GCF_034355335.1	98.85	refseq	FMT-1	Pretreatment
CGCTTCA_GTATAAG_TTTGCGC	Blautia coccoides	GCF_034355335.1	98.85	refseq	FMT-1	Pretreatment
CTGCCTA_AAACGTC_CGCTATC	Blautia coccoides	GCF_034355335.1	98.85	refseq	FMT-1	Pretreatment
AACCGCG_AAACGTC_GGATGTT	Blautia coccoides	GCF_034355335.1	98.85	refseq	FMT-1	Pretreatment
CAAGAAA_ACTGAAC_TCCACAC	Blautia coccoides	GCF_034355335.1	98.85	refseq	FMT-1	Pretreatment
ACCGTAA_TGAGCCG_TGAGAGG	Blautia coccoides	GCF_034355335.1	98.85	refseq	FMT-1	Pretreatment
AAGGTTC_CGAATGT_GCTGCAG	Blautia coccoides	GCF_034355335.1	98.85	refseq	FMT-1	Pretreatment
GATCGAT_TGCTTGC_TGGGAAG	Blautia coccoides	GCF_034355335.1	98.85	refseq	FMT-1	Pretreatment
CTTCTCT_AGACATA_AGTGGGA	[Clostridium] innocuum	GCF_012271835.1	98.85	refseq	FMT-1	Pretreatment
AGGCCAC_GGAGCAA_GGGTTGC	Blautia coccoides	GCF_034355335.1	98.85	refseq	FMT-1	Pretreatment
AGGCCAC_GACCAAT_TTTGCGC	Blautia coccoides	GCF_034355335.1	98.85	refseq	FMT-1	Pretreatment
CGAACAT_GTCGTAA_TGGACGC	Blautia coccoides	GCF_034355335.1	98.85	refseq	FMT-1	Pretreatment
AGCTCTC_TTGGAAC_CATAACT	Blautia coccoides	GCF_034355335.1	98.85	refseq	FMT-1	Pretreatment
ATTCTAC_GTAACTG_GCTGCAG	Blautia coccoides	GCF_034355335.1	98.85	refseq	FMT-1	Pretreatment
CTAAGAC_ACGAGGA_TAAGCGT	Blautia coccoides	GCF_034355335.1	98.85	refseq	FMT-1	Pretreatment
CTTAGGA_CTCAATA_GGAACTT	Blautia coccoides	GCF_034355335.1	98.85	refseq	FMT-1	Pretreatment
GACCTGG_ACAACAC_AAACAAC	Blautia coccoides	GCF_034355335.1	98.85	refseq	FMT-1	Pretreatment
CGTAGCG_TGGCTGG_AGTGGGA	Blautia coccoides	GCF_034355335.1	98.85	refseq	FMT-1	Pretreatment
CAGTCCT_CTTCTCT_AAGGTTC	Blautia coccoides	GCF_034355335.1	98.85	refseq	FMT-1	Pretreatment
AACCGCG_CTCTACG_GCGCAAC	Blautia coccoides	GCF_034355335.1	98.85	refseq	FMT-1	Pretreatment
ACCGTAA_GTTCTCG_TGGACGC	Thomasclavelia ramosa	GCF_016728785.1	98.85	refseq	FMT-1	Pretreatment
CGAACAT_CATATCG_CGCTATC	[Clostridium] innocuum	GCF_012317185.1	98.85	refseq	FMT-1	Pretreatment
ATGTGTG_TGGCTGG_ACCGTAA	Blautia coccoides	GCF_034355335.1	98.85	refseq	FMT-1	Pretreatment
CGAACAT_GTATAAG_GGGTTGC	Blautia coccoides	GCF_034355335.1	98.85	refseq	FMT-1	Pretreatment
CGCTTCA_TGAGCCG_GTGTGCG	Phocaeicola vulgatus	GCF_024758205.1	98.85	refseq	FMT-1	Pretreatment
CAGAGAG_GTAACTG_TAGACCA	Thomasclavelia ramosa	GCF_016027135.1	98.85	refseq	FMT-1	Pretreatment
CAAGAAA_CGACGTT_GGATGTT	Blautia coccoides	GCF_034355335.1	98.85	refseq	FMT-1	Pretreatment
CGAGAAG_GTAACTG_AGCGGTC	Blautia coccoides	GCF_034355335.1	98.85	refseq	FMT-1	Pretreatment
GCATGCG_CGCGGTA_AGGGCTT	Blautia coccoides	GCF_034355335.1	98.85	refseq	FMT-1	Pretreatment
GATCGAT_CACACCT_CATTCGC	Blautia coccoides	GCF_034355335.1	98.85	refseq	FMT-1	Pretreatment
GCATGCG_CTCAATA_GGATGTT	Blautia coccoides	GCF_034355335.1	98.85	refseq	FMT-1	Pretreatment
ACTTGTT_GCCTCTA_GTGTGCG	Blautia coccoides	GCF_034355335.1	98.85	refseq	FMT-1	Pretreatment
CGGAGCT_ATGTGTG_CATAACT	Blautia coccoides	GCF_034355335.1	98.85	refseq	FMT-1	Pretreatment
GACTACA_CATTCGC_ACGATAC	Phocaeicola vulgatus	GCF_008728395.1	98.85	refseq	FMT-1	Pretreatment
GCAGCCA_CACTCCA_AGGAGGT	Mediterraneibacter gnavus	GCF_026278325.1	98.85	refseq	FMT-1	Pretreatment
CGTTCTG_AAATCCA_AATCTTG	Blautia coccoides	GCF_034355335.1	98.85	refseq	FMT-1	Pretreatment
GACTACA_ACTTTCA_AAGGTTC	Phocaeicola vulgatus	GCF_024758205.1	98.85	refseq	FMT-1	Pretreatment
GAATAAG_ATCATTC_TGGCGCA	Blautia coccoides	GCF_034355335.1	98.85	refseq	FMT-1	Pretreatment
TTGCGTC_TGGCTGG_GTTGCTT	Blautia coccoides	GCF_034355335.1	98.85	refseq	FMT-1	Pretreatment
GTTCATT_ATCATTC_TTTGCGC	Phocaeicola vulgatus	GCF_020091465.1	98.85	refseq	FMT-1	Pretreatment
TTAGGCA_CTCCTAG_ACCGTAA	Blautia coccoides	GCF_034355335.1	98.85	refseq	FMT-1	Pretreatment
TTCGGTC_GTGAAGG_GGTAGTG	Phocaeicola vulgatus	GCF_000012825.1	98.85	refseq	FMT-1	Pretreatment
GTGCAGC_TCACGAA_GAAATGA	Thomasclavelia ramosa	GCF_020097255.1	98.85	refseq	FMT-1	Pretreatment
TCGTAGA_TGCTTGC_GTATCTT	Thomasclavelia ramosa	GCF_016027135.1	98.85	refseq	FMT-1	Pretreatment
TTTATGC_ACGGGTC_AGAATCT	Phocaeicola vulgatus	GCF_024758205.1	98.85	refseq	FMT-1	Pretreatment
TACTTAC_TGAGCCG_ACTACCT	Blautia coccoides	GCF_034355335.1	98.85	refseq	FMT-1	Pretreatment
TTCGGTC_CTCCTAG_CGTAGCG	Blautia coccoides	GCF_034355335.1	98.85	refseq	FMT-1	Pretreatment
TTTATGC_ACCAAGT_GAAATGA	Blautia coccoides	GCF_034355335.1	98.85	refseq	FMT-1	Pretreatment
TACTTAC_TGGCTGG_AAACAAC	Phocaeicola vulgatus	GCF_024758205.1	98.85	refseq	FMT-1	Pretreatment
GTGCAGC_AGGTGTA_TCAACGA	Blautia coccoides	GCF_034355335.1	98.85	refseq	FMT-1	Pretreatment
GGTATTG_GGAGCAA_TTGCCGT	[Clostridium] innocuum	GCF_023008265.1	98.85	refseq	FMT-1	Pretreatment
TGTGTTT_TAAGAGA_TGAGAGG	Phocaeicola vulgatus	GCF_020091465.1	98.85	refseq	FMT-1	Pretreatment
GTAACGT_AAGACCT_ACGGCCA	Blautia coccoides	GCF_034355335.1	98.85	refseq	FMT-1	Pretreatment
TGAGCCG_TTTGCCA_GGCGACT	Blautia coccoides	GCF_034355335.1	98.85	refseq	FMT-1	Pretreatment
GTTCATT_CGTTGGG_CATTCGC	Blautia coccoides	GCF_034355335.1	98.85	refseq	FMT-1	Pretreatment
TTTACTG_CACCTTA_GACGTTA	Blautia coccoides	GCF_034355335.1	98.85	refseq	FMT-1	Pretreatment
TACGGGC_GTATAAG_TTGGCAA	Blautia coccoides	GCF_034355335.1	98.85	refseq	FMT-1	Pretreatment
TACACGA_CACACCT_CTTGGCT	Blautia coccoides	GCF_034355335.1	98.85	refseq	FMT-1	Pretreatment
TATCTCA_CGCGGTA_CGAACAT	Blautia coccoides	GCF_034355335.1	98.85	refseq	FMT-1	Pretreatment
TTAGGCA_TTAGGAC_AGAATCT	Blautia coccoides	GCF_034355335.1	98.85	refseq	FMT-1	Pretreatment
AAGGTTC_AAGACCT_CTTGGCT	[Clostridium] innocuum	GCF_023008265.1	98.84	refseq	FMT-1	Pretreatment
ATCTACT_GCACATA_AAACAAC	[Clostridium] innocuum	GCF_012271835.1	98.84	refseq	FMT-1	Pretreatment
AAGGTTC_GCACATA_TGGGAAG	[Clostridium] innocuum	GCF_022845735.1	98.84	refseq	FMT-1	Pretreatment
CGTTCTG_TTGACTC_GGGTTGC	Blautia coccoides	GCF_034355335.1	98.83	refseq	FMT-1	Pretreatment
GCATGCG_CACTCCA_TACTCAT	Blautia coccoides	GCF_034355335.1	98.83	refseq	FMT-1	Pretreatment
CAAGAAA_CGTAGCA_GGCGACT	Blautia coccoides	GCF_034355335.1	98.83	refseq	FMT-1	Pretreatment
ACGATAC_TTCGAAG_TTCGGAC	Blautia coccoides	GCF_034355335.1	98.83	refseq	FMT-1	Pretreatment
AAGGTTC_TTCGAAG_TCTTCGG	Blautia coccoides	GCF_034355335.1	98.83	refseq	FMT-1	Pretreatment
AACGTTG_ATTGGAC_CTGAAAC	Blautia coccoides	GCF_034355335.1	98.83	refseq	FMT-1	Pretreatment
CAGAGAG_GGAGCAA_AAATGAG	Blautia coccoides	GCF_034355335.1	98.83	refseq	FMT-1	Pretreatment
GCATGCG_TGAGCCG_CTCGAAA	[Clostridium] innocuum	GCF_023008265.1	98.83	refseq	FMT-1	Pretreatment
CACACAA_GTCGTAA_AGGAGGT	Blautia coccoides	GCF_034355335.1	98.83	refseq	FMT-1	Pretreatment
ATTCTAC_ACACCGG_AGAATCT	Thomasclavelia ramosa	GCF_014131695.1	98.83	refseq	FMT-1	Pretreatment
ATTCTAC_CACTCCA_GGAACTT	Blautia coccoides	GCF_034355335.1	98.83	refseq	FMT-1	Pretreatment
CTCGGAG_GGAGCAA_TCAACGA	Blautia coccoides	GCF_034355335.1	98.83	refseq	FMT-1	Pretreatment
CAGTCCT_CTCCTAG_TTGCCGT	Flavonifractor plautii	GCF_001688625.2	98.83	refseq	FMT-1	Pretreatment
ATCTACT_CTCACAC_CACAAAC	Blautia coccoides	GCF_034355335.1	98.83	refseq	FMT-1	Pretreatment
CTCGGAG_TGAGGGA_CTGAAAC	Phocaeicola vulgatus	GCF_018289355.1	98.83	refseq	FMT-1	Pretreatment
GCGCCAA_GGGCACT_TGACGGC	Blautia coccoides	GCF_034355335.1	98.83	refseq	FMT-1	Pretreatment
CAGCTAA_CACAAGG_TGAGAGG	Blautia coccoides	GCF_034355335.1	98.83	refseq	FMT-1	Pretreatment
AGAGCTT_CGGTTAA_TTAGGCA	Thomasclavelia ramosa	GCF_020097255.1	98.83	refseq	FMT-1	Pretreatment
GCTGCAG_TCTGAGA_TGGGAAG	Blautia coccoides	GCF_034355335.1	98.83	refseq	FMT-1	Pretreatment
CGGAGCT_AAACGTC_GATCAGT	Blautia coccoides	GCF_034355335.1	98.83	refseq	FMT-1	Pretreatment
ACGCCGA_GCTGCTT_GAAATGA	Blautia coccoides	GCF_034355335.1	98.83	refseq	FMT-1	Pretreatment
ACCGTAA_CATTCGC_GGAACTT	Blautia coccoides	GCF_034355335.1	98.83	refseq	FMT-1	Pretreatment
AGTAGTC_TCAGATG_ACACTGA	[Clostridium] innocuum	GCF_023008265.1	98.83	refseq	FMT-1	Pretreatment
CGTAGCG_ACACCGG_TGACGGC	Blautia coccoides	GCF_034355335.1	98.83	refseq	FMT-1	Pretreatment
CAGAGAG_CAGGTGC_TAGACCA	Blautia coccoides	GCF_034355335.1	98.83	refseq	FMT-1	Pretreatment
GCATGCG_AAGACCT_GCCAAAT	Blautia coccoides	GCF_034355335.1	98.83	refseq	FMT-1	Pretreatment
GACCTGG_CTGCCTA_AATCTTG	Blautia coccoides	GCF_034355335.1	98.83	refseq	FMT-1	Pretreatment
CACATTT_TTTGCCA_ATTACTC	Blautia coccoides	GCF_034355335.1	98.83	refseq	FMT-1	Pretreatment
ATTCTAC_GTCGTAA_AGCGGTC	[Clostridium] innocuum	GCF_012317185.1	98.83	refseq	FMT-1	Pretreatment
CTTAGGA_GCACATA_CGACTTC	Phocaeicola vulgatus	GCF_036419465.1	98.83	refseq	FMT-1	Pretreatment
GGAAAGC_TTTGCCA_GTAATCG	Phocaeicola vulgatus	GCF_020091465.1	98.83	refseq	FMT-1	Pretreatment
TACTTAC_GTTCTCG_TCAGATG	Blautia coccoides	GCF_034355335.1	98.83	refseq	FMT-1	Pretreatment
TACTTAC_TTGGAAC_AACTCTT	Blautia coccoides	GCF_034355335.1	98.83	refseq	FMT-1	Pretreatment
TACGGGC_TTAGGAC_TCGAGGC	Blautia coccoides	GCF_034355335.1	98.83	refseq	FMT-1	Pretreatment
TATCTCA_AAACGTC_ATTACTC	Blautia coccoides	GCF_034355335.1	98.83	refseq	FMT-1	Pretreatment
TTGCGTC_TCAGATG_TGATTTC	Blautia coccoides	GCF_034355335.1	98.83	refseq	FMT-1	Pretreatment
GTTCATT_TGTACCT_GACCTGG	Blautia coccoides	GCF_034355335.1	98.83	refseq	FMT-1	Pretreatment
GTGGGTC_GTTCATT_CTGAAAC	Blautia coccoides	GCF_034355335.1	98.83	refseq	FMT-1	Pretreatment
TCACGAA_TTCTCAA_AAAGATG	Blautia coccoides	GCF_034355335.1	98.83	refseq	FMT-1	Pretreatment
GTGCAGC_CAGATCA_ATTACTC	Blautia coccoides	GCF_034355335.1	98.83	refseq	FMT-1	Pretreatment
GGTATTG_GAATGAA_GACGTTA	Blautia coccoides	GCF_034355335.1	98.83	refseq	FMT-1	Pretreatment
GTGTTAG_AGACATA_GAAATGA	Blautia coccoides	GCF_034355335.1	98.83	refseq	FMT-1	Pretreatment
GGGCACT_GGTAGTG_TTGGCAA	Blautia coccoides	GCF_034355335.1	98.83	refseq	FMT-1	Pretreatment
TGGCGCA_AGGTGTA_AAACAAC	Blautia coccoides	GCF_034355335.1	98.83	refseq	FMT-1	Pretreatment
GTGTTAG_ACGCAGA_GCTGGGT	Blautia coccoides	GCF_034355335.1	98.83	refseq	FMT-1	Pretreatment
TCAGGAT_TTGACTC_GATCAGT	Blautia coccoides	GCF_034355335.1	98.83	refseq	FMT-1	Pretreatment
TGAGCCG_GTGAAGG_GTTGCTT	Blautia coccoides	GCF_034355335.1	98.83	refseq	FMT-1	Pretreatment
GTTCATT_CAGGTGC_TCGTAGA	Blautia coccoides	GCF_034355335.1	98.83	refseq	FMT-1	Pretreatment
TATCTCA_CAGATCA_CAGCAGC	Blautia coccoides	GCF_034355335.1	98.83	refseq	FMT-1	Pretreatment
CAGAGAG_GGAAAGC_CGATTAT	Blautia coccoides	GCF_034355335.1	98.82	refseq	FMT-1	Pretreatment
CAGTCCT_TGGCTGG_ACCGTAA	[Clostridium] innocuum	GCF_012271835.1	98.81	refseq	FMT-1	Pretreatment
CTCTACG_GGGTTGC_ATTCTAC	Mediterraneibacter gnavus	GCF_026278325.1	98.81	refseq	FMT-1	Pretreatment
GCAGCCA_CAGATCA_CTCACAC	Mediterraneibacter gnavus	GCF_009831375.1	98.81	refseq	FMT-1	Pretreatment
GTGTTAG_ATGTGTG_AAACAAC	[Clostridium] innocuum	GCF_023008265.1	98.81	refseq	FMT-1	Pretreatment
GTGTTAG_TTCGAAG_ATTTCTG	[Clostridium] innocuum	GCF_012271835.1	98.81	refseq	FMT-1	Pretreatment
GACGTTA_TCTATTG_AGTAGTC	[Clostridium] innocuum	GCF_012271835.1	98.8	refseq	FMT-1	Pretreatment
AAGGTTC_CTGCCTA_CTGAAAC	Blautia coccoides	GCF_034355335.1	98.8	refseq	FMT-1	Pretreatment
CGTAGCG_GTCGTAA_AGCGGTC	[Clostridium] innocuum	GCF_022845735.1	98.8	refseq	FMT-1	Pretreatment
CTGCCTA_CGTTGGG_GCACTCT	[Clostridium] innocuum	GCF_012271835.1	98.8	refseq	FMT-1	Pretreatment
GTATCTT_GACTGTC_CTCCTAG	Blautia coccoides	GCF_034355335.1	98.8	refseq	FMT-1	Pretreatment
TCAGGAT_ACGAGGA_CGACTTC	Blautia coccoides	GCF_034355335.1	98.8	refseq	FMT-1	Pretreatment
CACACAA_CGGTTAA_ATCCGAA	[Clostridium] innocuum	GCF_012271835.1	98.79	refseq	FMT-1	Pretreatment
TTGCGTC_GCACATA_CATAACT	[Clostridium] innocuum	GCF_012271835.1	98.79	refseq	FMT-1	Pretreatment
GGAAAGC_GGTAGTG_CACACTC	[Clostridium] innocuum	GCF_012271835.1	98.79	refseq	FMT-1	Pretreatment
TCTCATA_ACTTTCA_CGATTAT	[Clostridium] innocuum	GCF_012271835.1	98.79	refseq	FMT-1	Pretreatment
CACACAA_ATTGGAC_GCTGGGT	Blautia coccoides	GCF_034355335.1	98.78	refseq	FMT-1	Pretreatment
GAGCAGA_CGGTTAA_CTCACAC	Blautia coccoides	GCF_034355335.1	98.78	refseq	FMT-1	Pretreatment
CGAGAAG_TGCTTGC_CAGCAGC	Blautia coccoides	GCF_034355335.1	98.78	refseq	FMT-1	Pretreatment
AGGCCAC_ACGAGGA_AGGAGGT	Blautia coccoides	GCF_034355335.1	98.78	refseq	FMT-1	Pretreatment
ATTCTAC_GCACATA_GCTGCAG	Blautia coccoides	GCF_034355335.1	98.78	refseq	FMT-1	Pretreatment
AAGGTTC_GGCCGAT_ATAAGGG	Blautia coccoides	GCF_034355335.1	98.78	refseq	FMT-1	Pretreatment
CACATTT_TTAGGAC_AGAATCT	Blautia coccoides	GCF_034355335.1	98.78	refseq	FMT-1	Pretreatment
CTCGGAG_TTTGCCA_CGTAGCG	Blautia coccoides	GCF_034355335.1	98.78	refseq	FMT-1	Pretreatment
CAGTCCT_ACTGAAC_AGTAGTC	[Clostridium] innocuum	GCF_023008265.1	98.78	refseq	FMT-1	Pretreatment
GCTCTGT_GACGTGC_CATTCGC	Blautia coccoides	GCF_034355335.1	98.78	refseq	FMT-1	Pretreatment
CAGTCCT_CACTCCA_AAAGATG	[Clostridium] innocuum	GCF_012271835.1	98.78	refseq	FMT-1	Pretreatment
AAGGTTC_TCAGATG_GCCAAAT	Blautia coccoides	GCF_034355335.1	98.78	refseq	FMT-1	Pretreatment
CTAATGG_AATCGGT_TTGCCGT	Blautia coccoides	GCF_034355335.1	98.78	refseq	FMT-1	Pretreatment
CGTAGCG_TCACGAA_TAGACCA	Blautia coccoides	GCF_034355335.1	98.78	refseq	FMT-1	Pretreatment
AACCGCG_AAGACCT_ACGATAC	Blautia coccoides	GCF_034355335.1	98.78	refseq	FMT-1	Pretreatment
GACGTTA_GGAAAGC_GCATGAT	Blautia coccoides	GCF_034355335.1	98.78	refseq	FMT-1	Pretreatment
CGATGGC_TGAGGGA_TACAGTG	Blautia coccoides	GCF_034355335.1	98.78	refseq	FMT-1	Pretreatment
ATCACGA_CGTTGGG_ACACTGA	Blautia coccoides	GCF_034355335.1	98.78	refseq	FMT-1	Pretreatment
CAGAGAG_AAACGTC_CAGTAAC	Blautia coccoides	GCF_034355335.1	98.78	refseq	FMT-1	Pretreatment
ATCTACT_GCACATA_AACTCTT	Thomasclavelia ramosa	GCF_016728785.1	98.78	refseq	FMT-1	Pretreatment
CAGCAGC_ATCATTC_CGGAGTC	Blautia coccoides	GCF_034355335.1	98.78	refseq	FMT-1	Pretreatment
AGAGCTT_GACGTGC_TCTGGAA	Blautia coccoides	GCF_034355335.1	98.78	refseq	FMT-1	Pretreatment
CTAAGAC_CAAGTTG_CATAACT	Blautia coccoides	GCF_034355335.1	98.78	refseq	FMT-1	Pretreatment
ACCGTAA_TCTGAGA_GAACCTA	Blautia coccoides	GCF_034355335.1	98.78	refseq	FMT-1	Pretreatment
ATCTACT_TGACTTT_CTCGAAA	Blautia coccoides	GCF_034355335.1	98.78	refseq	FMT-1	Pretreatment
CTTAGGA_CGTAGCA_CGCTATC	Blautia coccoides	GCF_034355335.1	98.78	refseq	FMT-1	Pretreatment
GACTACA_GGCCGAT_CGATTAT	Blautia coccoides	GCF_034355335.1	98.78	refseq	FMT-1	Pretreatment
CATTATC_GACCAAT_GGGCTAA	Blautia coccoides	GCF_034355335.1	98.78	refseq	FMT-1	Pretreatment
TCTCATA_TGTACCT_GCACTCT	Blautia coccoides	GCF_034355335.1	98.78	refseq	FMT-1	Pretreatment
GGGCACT_CAGATCA_GGAGCAA	Blautia coccoides	GCF_034355335.1	98.78	refseq	FMT-1	Pretreatment
TGCTGCT_GTAACTG_GGTAGTG	Blautia coccoides	GCF_034355335.1	98.78	refseq	FMT-1	Pretreatment
TCGTAGA_CGGAGCT_TGGCGCA	Blautia coccoides	GCF_034355335.1	98.78	refseq	FMT-1	Pretreatment
GGTATTG_AGCCTAA_GCACTCT	Thomasclavelia ramosa	GCF_016027135.1	98.78	refseq	FMT-1	Pretreatment
GTGTTAG_GTGAAGG_GTTGCTT	[Clostridium] innocuum	GCF_022845735.1	98.78	refseq	FMT-1	Pretreatment
GTATCTT_CACACCT_ATTCTAC	Blautia coccoides	GCF_034355335.1	98.78	refseq	FMT-1	Pretreatment
TCACGAA_TCTGAGA_TTTGCGC	Blautia coccoides	GCF_034355335.1	98.78	refseq	FMT-1	Pretreatment
TCGTAGA_TTCGAAG_CATTCGC	Blautia coccoides	GCF_034355335.1	98.78	refseq	FMT-1	Pretreatment
TCACGAA_TGACTTT_ATTACTC	Blautia coccoides	GCF_034355335.1	98.78	refseq	FMT-1	Pretreatment
TACGGGC_CATATCG_TCTTCGG	Blautia coccoides	GCF_034355335.1	98.78	refseq	FMT-1	Pretreatment
GTGTTAG_AGCTATT_CTTGGCT	[Clostridium] innocuum	GCF_023008265.1	98.78	refseq	FMT-1	Pretreatment
TTGCGTC_AGGTGTA_AGGGCTT	Blautia coccoides	GCF_034355335.1	98.78	refseq	FMT-1	Pretreatment
TTGCGTC_GGCCGAT_ATAAGGG	Blautia coccoides	GCF_034355335.1	98.78	refseq	FMT-1	Pretreatment
TACTTAC_GTTCATT_GGAACTT	Blautia coccoides	GCF_034355335.1	98.78	refseq	FMT-1	Pretreatment
TAGCCGG_GACGTGC_AAGGTTC	Blautia coccoides	GCF_034355335.1	98.78	refseq	FMT-1	Pretreatment
AGAGCTT_GAAACTC_ATTACTC	[Clostridium] innocuum	GCF_012271835.1	98.77	refseq	FMT-1	Pretreatment
GAGCAGA_GACCAAT_AGAAAGG	[Clostridium] innocuum	GCF_012271835.1	98.77	refseq	FMT-1	Pretreatment
TACACGA_TCGTCTT_GACGTTA	[Clostridium] innocuum	GCF_022845735.1	98.77	refseq	FMT-1	Pretreatment
TTGCGTC_ATTGGAC_CATATGG	[Clostridium] innocuum	GCF_012271835.1	98.77	refseq	FMT-1	Pretreatment
TTCGGTC_AATCGGT_GGATGTT	[Clostridium] innocuum	GCF_012317185.1	98.77	refseq	FMT-1	Pretreatment
TCGGGAC_AACTCAG_CATTCGC	[Clostridium] innocuum	GCF_012271835.1	98.77	refseq	FMT-1	Pretreatment
GACCTGG_CTCCTAG_TTAGGCA	Blautia coccoides	GCF_034355335.1	98.76	refseq	FMT-1	Pretreatment
CTAATGG_TGGCTGG_CGCGTTT	Blautia coccoides	GCF_034355335.1	98.76	refseq	FMT-1	Pretreatment
GAAATGA_GTGAAGG_AAGGTTC	Blautia coccoides	GCF_034355335.1	98.76	refseq	FMT-1	Pretreatment
CAGTCCT_TGAGCCG_CGGAGTC	Blautia coccoides	GCF_034355335.1	98.76	refseq	FMT-1	Pretreatment
AGCGTCG_ACTGAAC_ATAAGGG	Blautia coccoides	GCF_034355335.1	98.76	refseq	FMT-1	Pretreatment
CTAAGAC_CGGTTAA_TTAGGCA	Blautia coccoides	GCF_034355335.1	98.76	refseq	FMT-1	Pretreatment
GAAATGA_AGTTACG_TTGCCGT	Blautia coccoides	GCF_034355335.1	98.76	refseq	FMT-1	Pretreatment
CGATGGC_AGTTACG_GGCGACT	Mediterraneibacter gnavus	GCF_020181455.1	98.76	refseq	FMT-1	Pretreatment
AGGGTGA_AGACATA_GGGTTGC	Blautia coccoides	GCF_034355335.1	98.76	refseq	FMT-1	Pretreatment
CTTAGGA_ACGAGGA_CATAACT	Blautia coccoides	GCF_034355335.1	98.76	refseq	FMT-1	Pretreatment
AGTAGTC_AAACGTC_TGATTTC	Blautia coccoides	GCF_034355335.1	98.76	refseq	FMT-1	Pretreatment
GCTGCAG_CGATGTA_TCCACAC	Blautia coccoides	GCF_034355335.1	98.76	refseq	FMT-1	Pretreatment
TCGGGAC_AATCGGT_TTGGCAA	[Clostridium] innocuum	GCF_012271835.1	98.76	refseq	FMT-1	Pretreatment
TCTTCGG_AACCATG_GATCTAG	Blautia coccoides	GCF_034355335.1	98.76	refseq	FMT-1	Pretreatment
GTATCTT_AGCTATT_GGCGACT	Blautia coccoides	GCF_034355335.1	98.76	refseq	FMT-1	Pretreatment
GGCTCGA_AGACATA_GTTGCTT	Blautia coccoides	GCF_034355335.1	98.76	refseq	FMT-1	Pretreatment
TATCTCA_CATTCGC_CGCGTTT	Blautia coccoides	GCF_034355335.1	98.76	refseq	FMT-1	Pretreatment
GGCTCGA_ATAAGAG_TTGGCAA	Mediterraneibacter gnavus	GCF_020181455.1	98.76	refseq	FMT-1	Pretreatment
GGACGTC_AGCTATT_AAACAAC	Thomasclavelia ramosa	GCF_014131695.1	98.76	refseq	FMT-1	Pretreatment
TTTATGC_CATATCG_AAACAAC	Blautia coccoides	GCF_034355335.1	98.76	refseq	FMT-1	Pretreatment
TTGAACG_TAAGAGA_CGCTATC	Blautia coccoides	GCF_034355335.1	98.76	refseq	FMT-1	Pretreatment
GTGGGTC_CAAGTTG_TGATTTC	[Clostridium] innocuum	GCF_012271835.1	98.76	refseq	FMT-1	Pretreatment
GCAAACT_CTTCTCT_AGTGGGA	[Clostridium] innocuum	GCF_022845735.1	98.75	refseq	FMT-1	Pretreatment
GCTGGGT_TTGACTC_AGTGGGA	Blautia coccoides	GCF_034355335.1	98.75	refseq	FMT-1	Pretreatment
GAGCAGA_AATCGGT_ACACTGA	Blautia coccoides	GCF_034355335.1	98.75	refseq	FMT-1	Pretreatment
CGAACAT_CTTCTCT_CTCGAAA	Blautia coccoides	GCF_034355335.1	98.75	refseq	FMT-1	Pretreatment
GCTCTGT_GGGCACT_TTTGCGC	Blautia coccoides	GCF_034355335.1	98.75	refseq	FMT-1	Pretreatment
GACTACA_AGACATA_ATAAGGG	Enterocloster bolteae	GCF_016889665.1	98.75	refseq	FMT-1	Pretreatment
GCTCTGT_TCGTCTT_CATAACT	Blautia coccoides	GCF_034355335.1	98.75	refseq	FMT-1	Pretreatment
GATCGAT_CGACGTT_TGATTTC	Mediterraneibacter gnavus	GCF_020181455.1	98.75	refseq	FMT-1	Pretreatment
AACCGCG_GGAAAGC_ACCGTAA	Blautia coccoides	GCF_034355335.1	98.75	refseq	FMT-1	Pretreatment
CTAATGG_CTCACAC_CGTTAGA	Blautia coccoides	GCF_034355335.1	98.75	refseq	FMT-1	Pretreatment
GCAGCCA_CTCAATA_GACGTTA	Thomasclavelia ramosa	GCF_014131695.1	98.75	refseq	FMT-1	Pretreatment
CTCTACG_GCATACA_ACGATAC	Thomasclavelia ramosa	GCF_016027135.1	98.75	refseq	FMT-1	Pretreatment
CTCGGAG_TGGCTGG_AGCGGTC	Blautia coccoides	GCF_034355335.1	98.75	refseq	FMT-1	Pretreatment
ACTTGTT_CGATGTA_GCATGAT	Claveliimonas bilis	GCF_020892095.1	98.75	refseq	FMT-1	Pretreatment
AGCTCTC_AGGTGTA_CGCGTTT	Blautia coccoides	GCF_034355335.1	98.75	refseq	FMT-1	Pretreatment
CTTCTCT_CGCGGTA_TCAGATG	Blautia coccoides	GCF_034355335.1	98.75	refseq	FMT-1	Pretreatment
CGATGGC_ATAAGAG_ATTACTC	Blautia coccoides	GCF_034355335.1	98.75	refseq	FMT-1	Pretreatment
ACGATAC_TACTTGT_TTGGCAA	Blautia coccoides	GCF_034355335.1	98.75	refseq	FMT-1	Pretreatment
CTGCCTA_CGCGGTA_TGACGGC	Blautia coccoides	GCF_034355335.1	98.75	refseq	FMT-1	Pretreatment
GCAAACT_GTTCTCG_AAGGTTC	Blautia coccoides	GCF_034355335.1	98.75	refseq	FMT-1	Pretreatment
GGCAATT_GCGCGAT_GTGTGCG	Enterocloster bolteae	GCF_013112035.1	98.75	refseq	FMT-1	Pretreatment
TGAGCCG_TCTATTG_TGACGGC	Blautia coccoides	GCF_034355335.1	98.75	refseq	FMT-1	Pretreatment
TTAGGCA_GCATACA_TTGCCGT	Blautia coccoides	GCF_034355335.1	98.75	refseq	FMT-1	Pretreatment
GGCAATT_GTGCGGT_GTTGCTT	Blautia coccoides	GCF_034355335.1	98.75	refseq	FMT-1	Pretreatment
GGCAATT_GAATGAA_GATCTAG	Blautia coccoides	GCF_034355335.1	98.75	refseq	FMT-1	Pretreatment
GGCAATT_ACGAGGA_CTGCGGA	Blautia coccoides	GCF_034355335.1	98.75	refseq	FMT-1	Pretreatment
GTAACGT_AGCTATT_ATTACTC	Blautia coccoides	GCF_034355335.1	98.75	refseq	FMT-1	Pretreatment
GGGCACT_GCACATA_GTGTGCG	Blautia coccoides	GCF_034355335.1	98.75	refseq	FMT-1	Pretreatment
TTAGGCA_ATAAGAG_GTAATCG	Blautia coccoides	GCF_034355335.1	98.75	refseq	FMT-1	Pretreatment
TCAGCTC_AATCGGT_GGAGCAA	Mediterraneibacter gnavus	GCF_030167985.1	98.75	refseq	FMT-1	Pretreatment
TGGCGCA_CGGTTAA_TCGTAGA	Blautia coccoides	GCF_034355335.1	98.75	refseq	FMT-1	Pretreatment
GGGCACT_GTTCATT_AGTAGTC	Blautia coccoides	GCF_034355335.1	98.75	refseq	FMT-1	Pretreatment
TTCGGTC_TTTGCCA_TACTCAT	Blautia coccoides	GCF_034355335.1	98.75	refseq	FMT-1	Pretreatment
TCTTCGG_CGAATGT_CGAACAT	Enterocloster bolteae	GCF_023008325.1	98.75	refseq	FMT-1	Pretreatment
TTAGGCA_TTTGCCA_AAACAAC	Blautia coccoides	GCF_034355335.1	98.75	refseq	FMT-1	Pretreatment
[truncated: 52,596 more rows]
